# Supplementary material for: Global relationships between tree-cavity excavators and forest bird richness
Source: PubMed Central journal article supplement (PMC7428234; doi:10.1098/rsos.192177), 2020-07-08
Supplement: rsos192177_review_history.pdf [file rsos192177_review_history.pdf]

## **Global relationships between tree-cavity excavators and forest bird richness**

Yntze van der Hoek, Gabriel V. Gaona, Michał Ciach and Kathy Martin

### **Article citation details**

*R. Soc. open sci.* **7**: 192177.

<http://dx.doi.org/10.1098/rsos.192177>

### **Review timeline**

Original submission: 27 May 2019  
1st revised submission: 13 December 2019  
2nd revised submission: 31 January 2020  
3rd revised submission: 14 March 2020  
4th revised submission: 15 June 2020  
Final acceptance: 17 June 2020

Note: Reports are unedited and appear as submitted by the referee. The review history appears in chronological order.

## Review History

### RSOS-190962.R0 (Original submission)

#### Review form: Reviewer 1

**Is the manuscript scientifically sound in its present form?**

Yes

**Are the interpretations and conclusions justified by the results?**

Yes

**Is the language acceptable?**

Yes

**Do you have any ethical concerns with this paper?**

No

**Have you any concerns about statistical analyses in this paper?**

No

## Recommendation?

Major revision is needed (please make suggestions in comments)

### Comments to the Author(s)

General comment:

The manuscript entitled "Global and universal relationships between tree-cavity excavators and forest bird richness." reports on an interesting exploratory study linking woodpeckers/other tree cavity excavators, secondary cavity users and other forest tree species at the global and bioregional levels. The results are useful and may inspire new studies exploring these relationships more in-depth. My main criticism concerns the quality of reasoning and how and to what extent different issues are introduced and discussed. Proposing the use of certain group of species as indicators or other type of indicator species shall rest on solid grounds as well as need of such indicators should be clearly put forward. I simply miss the delineation of the conservation/management problem why we need indicators. There are many articles published on the worldwide decline of primary/intact forests, their characteristics and, in my opinion, you do not use the opportunity to discuss the potential role of woodpeckers/other tree cavity excavators (with very intimate linkages to natural forest characteristics) to support your case. Also, even if you mention their usefulness in management, there is lacking information on the intensively managed forests as areas that lose both important characteristics linked to old-growth forests and forests with high level of naturalness and thereby lose most specialized forest species often being woodpeckers. Also use of woodpeckers/other excavators as indicators of successful forest restoration could be mentioned. There is large body of literature on both above topics and I suggest that you should add paragraphs pertaining on these issues in both Introduction and Discussion sections. To limit the length of the article, you may get rid of several unnecessary repetitions. More suggestions below:

Detailed comments:

Line 99: Several species use smaller trees or snags too. Possibly add "often" or "usually".

Line 109: Woodpeckers (cavity excavators) are most often resident species what could additionally strengthen your reasoning on strong linkages to forest environments and their quality.

Lines 127-133: Please consult Wesolowski and Martin (2018) and extend the discussion on mechanism a bit more. I am lacking a clear statement on two possible, non-excluding each other mechanisms of expected relationships as very nicely stated way down in Discussion (Lines 312-314).

RESULTS: Could you add a summary table with numbers of species in different groups in different bioregions? It would provide some nice background for further discussions of results. You have those numbers already!

Lines 224-231: I do not understand how you can model the relationship between woodpeckers and the three other groups in Australasia, where, as you state below, there is no woodpeckers or even other strong excavators are largely lacking.

DISCUSSION: a bit confusing use of words "excavators/woodpeckers" (Line 244) and "excavators" (Line 275). Please check if necessary to use both of them!

Lines 239-243: Worthy to mention that forests in some bioregions supply decay-formed cavities in high numbers (particularly non-managed forests) and some other not (e.g. boreal forest in Europe - see Andersson et al. (2018): Andersson J., Domingo Gomez E., Michon S., Roberge J.-M. (2018) Tree cavity densities and characteristics in managed and unmanaged Swedish boreal forest. *Scandinavian Journal of Forest Research*, 33 (3), pp. 233-244. It would add the management angle in discussion about the role of woodpeckers/excavators for other species.

Lines 272-273: Please refer to studies on the global species richness of woodpeckers e.g. Mikusinski, G. 2006. Woodpeckers (Picidae) - distribution, conservation and research in a global perspective. *Annales Zoologici Fennici* 43: 86-95.

Lines 289-294: Refer also to the "primeval" Bialowieza Forest case in temperate zone being in stark contrast to managed forests (i.e. higher predation risk and subsequently preference for decay-formed cavities among secondary users. See: Wesolowski and Martin (2018) and references therein.

Lines 299-304: Please refer to papers by Wesolowski here: Wesolowski T. 2011. "Lifespan" of woodpecker-made holes in a primeval temperate forest: A thirty year study. Forest Ecology and Management, 262 (9) , pp. 1846-1852.

## Review form: Reviewer 2

**Is the manuscript scientifically sound in its present form?**

No

**Are the interpretations and conclusions justified by the results?**

No

**Is the language acceptable?**

Yes

**Do you have any ethical concerns with this paper?**

No

**Have you any concerns about statistical analyses in this paper?**

Yes

**Recommendation?**

Major revision is needed (please make suggestions in comments)

**Comments to the Author(s)**

Many comments are made in the word file attached (Appendix A).

## Decision letter (RSOS-190962.R0)

31-Jul-2019

Dear Dr van der Hoek:

Manuscript ID RSOS-190962 entitled "Global and universal relationships between tree-cavity excavators and forest bird richness" which you submitted to Royal Society Open Science, has been reviewed. The comments from reviewers are included at the bottom of this letter.

In view of the criticisms of the reviewers, the manuscript has been rejected in its current form. However, a new manuscript may be submitted which takes into consideration these comments.

Please note that resubmitting your manuscript does not guarantee eventual acceptance, and that your resubmission will be subject to peer review before a decision is made.

You will be unable to make your revisions on the originally submitted version of your manuscript. Instead, revise your manuscript and upload the files via your author centre.

Once you have revised your manuscript, go to <https://mc.manuscriptcentral.com/rsos> and login to your Author Center. Click on "Manuscripts with Decisions," and then click on "Create a Resubmission" located next to the manuscript number. Then, follow the steps for resubmitting your manuscript.

Your resubmitted manuscript should be submitted by 28-Jan-2020. If you are unable to submit by this date please contact the Editorial Office.

We look forward to receiving your resubmission.

Kind regards,  
Alice Power  
Editorial Coordinator  
Royal Society Open Science  
openscience@royalsociety.org

on behalf of Kevin Padian (Subject Editor)  
openscience@royalsociety.org

Subject Editor Comments to Authors:

I am recommending a "reject/resub" decision because our "revision" turnaround time may be too short for the authors' needs in revising, and because the reviewers have raised extensive concerns, despite being encouraging overall about the manuscript.

They see issues with how the main problem of the study is set out, the methods, the evaluation, and the conclusions. They also note a geographic bias that may entail ecological biases in the relationships of excavators to their ecosystems.

If you elect to re-submit, please detail your responses to reviewers' comments and make clear how you have altered your re-submitted manuscript. Best wishes with your revisions.

Reviewers' Comments to Author:

Reviewer: 1

General comment:

The manuscript entitled "Global and universal relationships between tree-cavity excavators and forest bird richness." reports on an interesting exploratory study linking woodpeckers/other tree cavity excavators, secondary cavity users and other forest tree species at the global and bioregional levels. The results are useful and may inspire new studies exploring these relationships more in-depth. My main criticism concerns the quality of reasoning and how and to what extent different issues are introduced and discussed. Proposing the use of certain group of species as indicators or other type of indicator species shall rest on solid grounds as well as need of such indicators should be clearly put forward. I simply miss the delineation of the conservation/management problem why we need indicators. There are many articles published on the worldwide decline of primary/intact forests, their characteristics and, in my opinion, you do not use the opportunity to discuss the potential role of woodpeckers/other tree cavity excavators (with very intimate linkages to natural forest characteristics) to support your case. Also, even if you mention their usefulness in management, there is lacking information on the intensively managed forests as areas that lose both important characteristics linked to old-growth forests and forests with high level of naturalness and thereby lose most specialized forest species often being woodpeckers. Also use of woodpeckers/other excavators as indicators of successful forest restoration could be mentioned. There is large body of literature on both above topics and I suggest that you should add paragraphs pertaining on these issues in both Introduction and Discussion sections. To limit the length of the article, you may get rid of several unnecessary repetitions. More suggestions below:

Detailed comments:

Line 99: Several species use smaller trees or snags too. Possibly add "often" or "usually".

Line 109: Woodpeckers (cavity excavators) are most often resident species what could additionally strengthen your reasoning on strong linkages to forest environments and their quality.

Lines 127-133: Please consult Wesolowski and Martin (2018) and extend the discussion on mechanism a bit more. I am lacking a clear statement on two possible, non-excluding each other mechanisms of expected relationships as very nicely stated way down in Discussion (Lines 312-314).

RESULTS: Could you add a summary table with numbers of species in different groups in different bioregions? It would provide some nice background for further discussions of results. You have those numbers already!

Lines 224-231: I do not understand how you can model the relationship between woodpeckers and the three other groups in Australasia, where, as you state below, there is no woodpeckers or even other strong excavators are largely lacking.

DISCUSSION: a bit confusing use of words "excavators/woodpeckers" (Line 244) and "excavators" (Line 275). Please check if necessary to use both of them!

Lines 239-243: Worthy to mention that forests in some bioregions supply decay-formed cavities in high numbers (particularly non-managed forests) and some other not (e.g. boreal forest in Europe – see Andersson et al. (2018): Andersson J., Domingo Gomez E., Michon S., Roberge J.-M. (2018) Tree cavity densities and characteristics in managed and unmanaged Swedish boreal forest. *Scandinavian Journal of Forest Research*, 33 (3), pp. 233-244. It would add the management angle in discussion about the role of woodpeckers/excavators for other species.

Lines 272-273: Please refer to studies on the global species richness of woodpeckers e.g. Mikusinski, G. 2006. Woodpeckers (Picidae) - distribution, conservation and research in a global perspective. *Annales Zoologici Fennici* 43: 86-95.

Lines 289-294: Refer also to the "primeval" Bialowieza Forest case in temperate zone being in stark contrast to managed forests (i.e. higher predation risk and subsequently preference for decay-formed cavities among secondary users. See: Wesolowski and Martin (2018) and references therein.

Lines 299-304: Please refer to papers by Wesolowski here: Wesolowski T. 2011. "Lifespan" of woodpecker-made holes in a primeval temperate forest: A thirty year study. *Forest Ecology and Management*, 262 (9) , pp. 1846-1852.

Reviewer: 2

Comments to the Author(s)

Many comments are made in the word file attached

## Author's Response to Decision Letter for (RSOS-190962.R0)

See Appendix B.

## RSOS-192177.R0

Review form: Reviewer 1

**Is the manuscript scientifically sound in its present form?**

Yes

**Are the interpretations and conclusions justified by the results?**

Yes

**Is the language acceptable?**

Yes

**Do you have any ethical concerns with this paper?**

No

**Have you any concerns about statistical analyses in this paper?**

No

**Recommendation?**

Accept with minor revision (please list in comments)

**Comments to the Author(s)**

Line 130: add a bracket at the end of the sentence

Lines 164-187: I opt for a very short explanation what do you mean by "universal" used in the title of the paper already here.

Lines 268-277: In contrast with added information about not analysing woodpeckers in Australasia (lines 236-238), you report it here and in Table 2. It is confusing to me.

Line 293: I have a hard time finding the paper by Tikkanen et al. 2006 as supporting your claim here. Possibly cite several paper based on single-species woodpecker studies or use some of those:

JM Roberge, P Angelstam, MA Villard. 2008. Specialised woodpeckers and naturalness in hemiboreal forests—deriving quantitative targets for conservation planning. *Biological conservation*, 2008

or

Angelstam, P., & Mikusiński, G. 1994: Woodpecker assemblages in natural and managed boreal and hemiboreal forest - a review. *Annales Zoologici Fennici* 31: 157-172.

Lines 392-394: I suggest adding further argument here i.e. that woodpeckers are highly responsive to playbacks (both calls and particularly drumming) that, if applied in right season are very effective survey tool and cover relatively large areas. See e.g. Kumar, R. and Singh, P. (2010), Determining woodpecker diversity in the sub-Himalayan forests of northern India using call playbacks. *Journal of Field Ornithology*, 81: 215-222. doi:10.1111/j.1557-9263.2009.00267.x or Jeremy A. Baumgardt, Joel D. Sauder, and Kerry L. Nicholson (2014) Occupancy Modeling of Woodpeckers: Maximizing Detections for Multiple Species With Multiple Spatial Scales. *Journal of Fish and Wildlife Management*: December 2014, Vol. 5, No. 2, pp. 198-207.

Table 2: remove data concerning the woodpeckers (see my comment above)

There is one important paper dealing with woodpeckers at the global scale that is relevant to your study but omitted namely: Vergara-Tabares, D. L., M.Lammertink, E. G.Verga, A.Schaaf, and J.Nori (2018). Gone with the forest: Assessing global woodpecker conservation from land use patterns. *Diversity and Distributions* 24:640–651.

Please consider mentioning the results of this paper in the Introduction or Discussion. It is particularly interesting from the management perspective and the human influence on forest qualities.

## Review form: Reviewer 2

**Is the manuscript scientifically sound in its present form?**

No

**Are the interpretations and conclusions justified by the results?**

No

**Is the language acceptable?**

Yes

**Do you have any ethical concerns with this paper?**

No

**Have you any concerns about statistical analyses in this paper?**

Yes

**Recommendation?**

Major revision is needed (please make suggestions in comments)

**Comments to the Author(s)**

For the article to have the potential to be accepted, the authors must work, in my opinion, mainly on the following points:

1) work on the predictions, making them more precise, with more ecological language, and that revolve around the two main causes that the authors propose as the main drivers determining the relationships of excavators and forest birds: the sharing of habitat requirements, and the provision of excavated cavities. How these causes spatially vary based on geographic, climatic and historical characteristics in each region, will determine the predictions that will be tested.

2) rethink the overlapping of the bird categories, assessing which is the best option to determine which of the aforementioned factors (i.e. sharing of habitat requirements and cavity provisions), are the most likely drivers of the proposed relationships. As I comment in the text, the definition of the categories is inconsistent with the methodology used. And, if I understood well the methodology, I also have the impression that the overlapping of categories used may be influencing the results, inflating the relationships between excavators and forest birds, since in this last category are also included many SCNs and forest specialists. I have seen your response to a related comment I made in the previous version. I guess that a good possibility is that the only categories that overlap are 2 (SCN) and 3 (forest specialists). That way, you can see relationships that supposedly may be due more exclusively to provision of cavities (relationships of excavator with 2 would be stronger than with 3), or more related to sharing habitat requirements (relationships of excavator with 3 would be stronger than with 2). Also, leaving category 4 without overlapping can lead to different results and interpretations I think could be more interesting.

3) The discussion needs a lot of work. I would suggest that you focus on the differences between the zoogeographic regions, which is the main objective of the paper and what has been evaluated. The differences that may exist within each region should be minimized to the maximum, and only mentioned when strictly necessary. The discussion still has a great bias to try to explain the relationships between excavators and SCN, and there is a considerably smaller space in trying to explain the relationships with forest birds that do not nest in cavities. Finally, relationships in the Australasia region, which showed a different pattern from the rest (even in sign), were not explained, and these results are practically ignored when proposed, from the title, and the first and last paragraph of the discussion, that relationships are common to all zoogeographic regions.

Many other comments have been made in the attached file (Appendix C).

## Decision letter (RSOS-192177.R0)

08-Jan-2020

Dear Dr van der Hoek,

The Subject Editor assigned to your paper ("Global and universal relationships between tree-cavity excavators and forest bird richness") has now received comments from reviewers. We would like you to revise your paper in accordance with the referee and Associate Editor suggestions which can be found below (not including confidential reports to the Editor). Please note this decision does not guarantee eventual acceptance.

Please submit a copy of your revised paper before 31-Jan-2020. Please note that the revision deadline will expire at 00.00am on this date. If we do not hear from you within this time then it will be assumed that the paper has been withdrawn. In exceptional circumstances, extensions may be possible if agreed with the Editorial Office in advance. We do not allow multiple rounds of revision so we urge you to make every effort to fully address all of the comments at this stage. If deemed necessary by the Editors, your manuscript will be sent back to one or more of the original reviewers for assessment. If the original reviewers are not available we may invite new reviewers.

To revise your manuscript, log into <http://mc.manuscriptcentral.com/rsos> and enter your Author Centre, where you will find your manuscript title listed under "Manuscripts with Decisions." Under "Actions," click on "Create a Revision." Your manuscript number has been appended to denote a revision. Revise your manuscript and upload a new version through your Author Centre.

When submitting your revised manuscript, you must respond to the comments made by the referees and upload a file "Response to Referees" in "Section 6 - File Upload". Please use this to document how you have responded to each of the comments, and the adjustments you have made. In order to expedite the processing of the revised manuscript, please be as specific as possible in your response.

In addition to addressing all of the reviewers' and editor's comments please also ensure that your revised manuscript contains the following sections before the reference list:

- Ethics statement

If your study uses humans or animals please include details of the ethical approval received, including the name of the committee that granted approval. For human studies please also detail whether informed consent was obtained. For field studies on animals please include details of all permissions, licences and/or approvals granted to carry out the fieldwork.

- Data accessibility

It is a condition of publication that all supporting data are made available either as supplementary information or preferably in a suitable permanent repository. The data accessibility section should state where the article's supporting data can be accessed. This section should also include details, where possible of where to access other relevant research materials such as statistical tools, protocols, software etc can be accessed. If the data has been deposited in an external repository this section should list the database, accession number and link to the DOI for all data from the article that has been made publicly available. Data sets that have been



deposited in an external repository and have a DOI should also be appropriately cited in the manuscript and included in the reference list.

If you wish to submit your supporting data or code to Dryad (<http://datadryad.org/>), or modify your current submission to dryad, please use the following link:  
<http://datadryad.org/submit?journalID=RSOS&manu=RSOS-192177>

- **Competing interests**

Please declare any financial or non-financial competing interests, or state that you have no competing interests.

- **Authors' contributions**

All submissions, other than those with a single author, must include an Authors' Contributions section which individually lists the specific contribution of each author. The list of Authors should meet all of the following criteria; 1) substantial contributions to conception and design, or acquisition of data, or analysis and interpretation of data; 2) drafting the article or revising it critically for important intellectual content; and 3) final approval of the version to be published.

All contributors who do not meet all of these criteria should be included in the acknowledgements.

We suggest the following format:

AB carried out the molecular lab work, participated in data analysis, carried out sequence alignments, participated in the design of the study and drafted the manuscript; CD carried out the statistical analyses; EF collected field data; GH conceived of the study, designed the study, coordinated the study and helped draft the manuscript. All authors gave final approval for publication.

- **Acknowledgements**

Please acknowledge anyone who contributed to the study but did not meet the authorship criteria.

- **Funding statement**

Please list the source of funding for each author.

Once again, thank you for submitting your manuscript to Royal Society Open Science and I look forward to receiving your revision. If you have any questions at all, please do not hesitate to get in touch.

Kind regards,

Andrew Dunn

Royal Society Open Science Editorial Office

Royal Society Open Science

[openscience@royalsociety.org](mailto:openscience@royalsociety.org)

on behalf of Prof Kevin Padian (Subject Editor)

[openscience@royalsociety.org](mailto:openscience@royalsociety.org)

Associate Editor Comments to Author:

The reviewers have provided further substantial feedback, but are broadly of the view that not only have you made efforts to improve the manuscript but that there is certainly merit in the general 'story' the manuscript is telling.

With this in mind, we'd like to invite you to submit a revised manuscript for further consideration. Bear in mind that we do not generally permit multiple rounds of revision, so

please do ensure that you incorporate the requested changes into the manuscript and provide an indication of how you've done so (using a tracked-changes version of the paper and a point-by-point response document).

Good luck!

Reviewer comments to Author:

Reviewer: 2

Comments to the Author(s)

For the article to have the potential to be accepted, the authors must work, in my opinion, mainly on the following points:

1) work on the predictions, making them more precise, with more ecological language, and that revolve around the two main causes that the authors propose as the main drivers determining the relationships of excavators and forest birds: the sharing of habitat requirements, and the provision of excavated cavities. How these causes spatially vary based on geographic, climatic and historical characteristics in each region, will determine the predictions that will be tested.

2) rethink the overlapping of the bird categories, assessing which is the best option to determine which of the aforementioned factors (i.e. sharing of habitat requirements and cavity provisions), are the most likely drivers of the proposed relationships. As I comment in the text, the definition of the categories is inconsistent with the methodology used. And, if I understood well the methodology, I also have the impression that the overlapping of categories used may be influencing the results, inflating the relationships between excavators and forest birds, since in this last category are also included many SCNs and forest specialists. I have seen your response to a related comment I made in the previous version. I guess that a good possibility is that the only categories that overlap are 2 (SCN) and 3 (forest specialists). That way, you can see relationships that supposedly may be due more exclusively to provision of cavities (relationships of excavator with 2 would be stronger than with 3), or more related to sharing habitat requirements (relationships of excavator with 3 would be stronger than with 2). Also, leaving category 4 without overlapping can lead to different results and interpretations I think could be more interesting.

3) The discussion needs a lot of work. I would suggest that you focus on the differences between the zoogeographic regions, which is the main objective of the paper and what has been evaluated. The differences that may exist within each region should be minimized to the maximum, and only mentioned when strictly necessary. The discussion still has a great bias to try to explain the relationships between excavators and SCN, and there is a considerably smaller space in trying to explain the relationships with forest birds that do not nest in cavities. Finally, relationships in the Australasia region, which showed a different pattern from the rest (even in sign), were not explained, and these results are practically ignored when proposed, from the title, and the first and last paragraph of the discussion, that relationships are common to all zoogeographic regions.

Many other comments have been made in the attached file

Reviewer: 1

Comments to the Author(s)

Line 130: add a bracket at the end of the sentence

Lines 164-187: I opt for a very short explanation what do you mean by "universal" used in the title of the paper already here.

Lines 268-277: In contrast with added information about not analysing woodpeckers in Australasia (lines 236-238), you report it here and in Table 2. It is confusing to me.

Line 293: I have a hard time finding the paper by Tikkanen et al. 2006 as supporting your claim here. Possibly cite several paper based on single-species woodpecker studies or use some of those:

JM Roberge, P Angelstam, MA Villard. 2008. Specialised woodpeckers and naturalness in hemiboreal forests—deriving quantitative targets for conservation planning. *Biological conservation*, 2008

or

Angelstam, P., & Mikusiński, G. 1994: Woodpecker assemblages in natural and managed boreal and hemiboreal forest - a review. *Annales Zoologici Fennici* 31: 157-172.

Lines 392-394: I suggest adding further argument here i.e. that woodpeckers are highly responsive to playbacks (both calls and particularly drumming) that, if applied in right season are very effective survey tool and cover relatively large areas. See e.g. Kumar, R. and Singh, P. (2010), Determining woodpecker diversity in the sub-Himalayan forests of northern India using call playbacks. *Journal of Field Ornithology*, 81: 215-222. doi:10.1111/j.1557-9263.2009.00267.x or Jeremy A. Baumgardt, Joel D. Sauder, and Kerry L. Nicholson (2014) Occupancy Modeling of Woodpeckers: Maximizing Detections for Multiple Species With Multiple Spatial Scales. *Journal of Fish and Wildlife Management*: December 2014, Vol. 5, No. 2, pp. 198-207.

Table 2: remove data concerning the woodpeckers (see my comment above)

There is one important paper dealing with woodpeckers at the global scale that is relevant to your study but omitted namely: Vergara-Tabares, D. L., M.Lammertink, E. G.Verga, A.Schaaf, and J.Nori (2018). Gone with the forest: Assessing global woodpecker conservation from land use patterns. *Diversity and Distributions* 24:640–651.

Please consider mentioning the results of this paper in the Introduction or Discussion. It is particularly interesting from the management perspective and the human influence on forest qualities.

## Author's Response to Decision Letter for (RSOS-192177.R0)

See Appendix D.

## RSOS-192177.R1 (Revision)

### Review form: Reviewer 1

**Is the manuscript scientifically sound in its present form?**

Yes

**Are the interpretations and conclusions justified by the results?**

Yes

**Is the language acceptable?**

No

**Do you have any ethical concerns with this paper?**

No

**Have you any concerns about statistical analyses in this paper?**

No

**Recommendation?**

Accept with minor revision (please list in comments)

**Comments to the Author(s)**

Dear Authors,

Thanks for the new version of the manuscript that I find generally improved. I have some further suggestions (see below) and also think that the entire text should be thoroughly read by the native speaker; it is "sloppy" in several places.

Line 172: remove "comma" after "indicator"

Line 175: add "with" after "correlation"

Line 179: possibly, in global perspective, better to use broad-leaved since several coniferous trees may be "deciduous". Or change the classification to temperate, boreal, tropical etc.

Lines 185-190: poor English - check and re-write

Line 218: using "same species" is confusing here. What do you mean by "same species"?

Lines 219-220: provide names of the authors in the text

Line 292: add "i.e." before "between excavators..."

Line 295: was rho really 0.88 in both cases?

Line 355: higher temperature?

Line 363: "largely tropical" instead of "more tropical"?

Line 367: provide valid reference for this claim i.e. on high logging rates in Oriental Region

Line 373-377: it seems to be against your prediction. Whole sentence is a bit confusing.

Line 386: what dynamics do you mean? Fire dynamics?

Line 514-516: I would explicitly mention high detectability here

## Review form: Reviewer 2

**Is the manuscript scientifically sound in its present form?**

No

**Are the interpretations and conclusions justified by the results?**

No

**Is the language acceptable?**

Yes

**Do you have any ethical concerns with this paper?**

No

**Have you any concerns about statistical analyses in this paper?**

Yes

**Recommendation?**

Major revision is needed (please make suggestions in comments)

**Comments to the Author(s)**

See attached (Appendix E).

## Decision letter (RSOS-192177.R1)

04-Mar-2020

Dear Dr van der Hoek:

Manuscript ID RSOS-192177.R1 entitled "Global relationships between tree-cavity excavators and forest bird richness" which you submitted to Royal Society Open Science, has been reviewed. The comments of the reviewer(s) are included at the bottom of this letter.

Please submit a copy of your revised paper before 27-Mar-2020. Please note that the revision deadline will expire at 00.00am on this date. If we do not hear from you within this time then it will be assumed that the paper has been withdrawn. In exceptional circumstances, extensions may be possible if agreed with the Editorial Office in advance. We do not allow multiple rounds of revision so we urge you to make every effort to fully address all of the comments at this stage. If deemed necessary by the Editors, your manuscript will be sent back to one or more of the original reviewers for assessment. If the original reviewers are not available we may invite new reviewers.

To revise your manuscript, log into <http://mc.manuscriptcentral.com/rsos> and enter your Author Centre, where you will find your manuscript title listed under "Manuscripts with Decisions." Under "Actions," click on "Create a Revision." Your manuscript number has been appended to denote a revision. Revise your manuscript and upload a new version through your Author Centre.

When submitting your revised manuscript, you must respond to the comments made by the referees and upload a file "Response to Referees" in "Section 6 - File Upload". Please use this to document how you have responded to the comments, and the adjustments you have made. In order to expedite the processing of the revised manuscript, please be as specific as possible in your response.

In addition to addressing all of the reviewers' and editor's comments please also ensure that your revised manuscript contains the following sections before the reference list:

- Ethics statement

If your study uses humans or animals please include details of the ethical approval received, including the name of the committee that granted approval. For human studies please also detail whether informed consent was obtained. For field studies on animals please include details of all permissions, licences and/or approvals granted to carry out the fieldwork.

- Data accessibility

It is a condition of publication that all supporting data are made available either as supplementary information or preferably in a suitable permanent repository. The data accessibility section should state where the article's supporting data can be accessed. This section should also include details, where possible of where to access other relevant research materials such as statistical tools, protocols, software etc can be accessed. If the data have been deposited in an external repository this section should list the database, accession number and link to the DOI for all data from the article that have been made publicly available. Data sets that have been deposited in an external repository and have a DOI should also be appropriately cited in the manuscript and included in the reference list.

- Competing interests

Please declare any financial or non-financial competing interests, or state that you have no competing interests.

- Authors' contributions

All submissions, other than those with a single author, must include an Authors' Contributions section which individually lists the specific contribution of each author. The list of Authors should meet all of the following criteria; 1) substantial contributions to conception and design, or acquisition of data, or analysis and interpretation of data; 2) drafting the article or revising it critically for important intellectual content; and 3) final approval of the version to be published.

All contributors who do not meet all of these criteria should be included in the acknowledgements.

We suggest the following format:

AB carried out the molecular lab work, participated in data analysis, carried out sequence alignments, participated in the design of the study and drafted the manuscript; CD carried out the statistical analyses; EF collected field data; GH conceived of the study, designed the study, coordinated the study and helped draft the manuscript. All authors gave final approval for publication.

- Acknowledgements

Please acknowledge anyone who contributed to the study but did not meet the authorship criteria.

- Funding statement

Please list the source of funding for each author.

Once again, thank you for submitting your manuscript to Royal Society Open Science and I look forward to receiving your revision. If you have any questions at all, please do not hesitate to get in touch.

Kind regards,  
Anita Kristiansen  
Editorial Coordinator

Royal Society Open Science  
openscience@royalsociety.org

on behalf of Kevin Padian (Subject Editor)  
openscience@royalsociety.org

Associate Editor Comments to Author:

Associate Editor: 1

Comments to the Author:

As the reviewers acknowledge you've made 'good faith' efforts to improve your paper in response to their concerns, we'd like to offer you a final opportunity to revise your manuscript - this will be your last chance to persuade the reviewers that your manuscript is ready for acceptance: if you are unable to do so after revision, we may not be able to consider the paper further. We wish you every success in this revision, and look forward to receiving a new version of the paper in due course.

Reviewer comments to Author:

Reviewer: 2

Comments to the Author(s)

See attached. (RSOS-192177.R1\_Proof\_hi.pdf)

Reviewer: 1

Comments to the Author(s)

Dear Authors,

Thanks for the new version of the manuscript that I find generally improved. I have some further suggestions (see below) and also think that the entire text should be thoroughly read by the native speaker; it is "sloppy" in several places.

Line 172: remove "comma" after "indicator"

Line 175: add "with" after "correlation"

Line 179: possibly, in global perspective, better to use broad-leaved since several coniferous trees may be "deciduous". Or change the classification to temperate, boreal, tropical etc.

Lines 185-190: poor English – check and re-write

Line 218: using "same species" is confusing here. What do you mean by "same species"?

Lines 219-220: provide names of the authors in the text

Line 292: add "i.e." before "between excavators..."

Line 295: was rho really 0.88 in both cases?

Line 355: higher temperature?

Line 363: "largely tropical" instead of "more tropical"?

Line 367: provide valid reference for this claim i.e. on high logging rates in Oriental Region

Line 373-377: it seems to be against your prediction. Whole sentence is a bit confusing.

Line 386: what dynamics do you mean? Fire dynamics?

Line 514-516: I would explicitly mention high detectability here

## Author's Response to Decision Letter for (RSOS-192177.R1)

See Appendix F.

## RSOS-192177.R2 (Revision)

### Review form: Reviewer 1

**Is the manuscript scientifically sound in its present form?**

Yes

**Are the interpretations and conclusions justified by the results?**

Yes

**Is the language acceptable?**

Yes

**Do you have any ethical concerns with this paper?**

No

**Have you any concerns about statistical analyses in this paper?**

No

**Recommendation?**

Accept with minor revision (please list in comments)

**Comments to the Author(s)**

I am generally pleased with changes included in this version of the manuscript. However, it would be great to carefully read some of the new sentences and improve them linguistically. For example check lines 312-319 and 363-368 (clean version) for missing words.

**Decision letter (RSOS-192177.R2)**

We hope you are keeping well at this difficult and unusual time. We continue to value your support of the journal in these challenging circumstances. If Royal Society Open Science can assist you at all, please don't hesitate to let us know at the email address below.

Dear Dr van der Hoek:

On behalf of the Editors, I am pleased to inform you that your Manuscript RSOS-192177.R2 entitled "Global relationships between tree-cavity excavators and forest bird richness" has been accepted for publication in Royal Society Open Science subject to minor revision in accordance with the referee suggestions. Please find the referees' comments at the end of this email.

The reviewers and Subject Editor have recommended publication, but also suggest some minor revisions to your manuscript. Therefore, I invite you to respond to the comments and revise your manuscript.

- Ethics statement

If your study uses humans or animals please include details of the ethical approval received, including the name of the committee that granted approval. For human studies please also detail whether informed consent was obtained. For field studies on animals please include details of all permissions, licences and/or approvals granted to carry out the fieldwork.

- Data accessibility

It is a condition of publication that all supporting data are made available either as supplementary information or preferably in a suitable permanent repository. The data accessibility section should state where the article's supporting data can be accessed. This section should also include details, where possible of where to access other relevant research materials such as statistical tools, protocols, software etc can be accessed. If the data has been deposited in an external repository this section should list the database, accession number and link to the DOI for all data from the article that has been made publicly available. Data sets that have been deposited in an external repository and have a DOI should also be appropriately cited in the manuscript and included in the reference list.

If you wish to submit your supporting data or code to Dryad (<http://datadryad.org/>), or modify your current submission to dryad, please use the following link:

<http://datadryad.org/submit?journalID=RSOS&manu=RSOS-192177.R2>

- Competing interests

Please declare any financial or non-financial competing interests, or state that you have no competing interests.

- Authors' contributions

All submissions, other than those with a single author, must include an Authors' Contributions section which individually lists the specific contribution of each author. The list of Authors



should meet all of the following criteria; 1) substantial contributions to conception and design, or acquisition of data, or analysis and interpretation of data; 2) drafting the article or revising it critically for important intellectual content; and 3) final approval of the version to be published.

All contributors who do not meet all of these criteria should be included in the acknowledgements.

We suggest the following format:

AB carried out the molecular lab work, participated in data analysis, carried out sequence alignments, participated in the design of the study and drafted the manuscript; CD carried out the statistical analyses; EF collected field data; GH conceived of the study, designed the study, coordinated the study and helped draft the manuscript. All authors gave final approval for publication.

- Acknowledgements

Please acknowledge anyone who contributed to the study but did not meet the authorship criteria.

- Funding statement

Please list the source of funding for each author.

Please note that we cannot publish your manuscript without these end statements included. We have included a screenshot example of the end statements for reference. If you feel that a given heading is not relevant to your paper, please nevertheless include the heading and explicitly state that it is not relevant to your work.

Because the schedule for publication is very tight, it is a condition of publication that you submit the revised version of your manuscript before 19-Jun-2020. Please note that the revision deadline will expire at 00.00am on this date. If you do not think you will be able to meet this date please let me know immediately.

To revise your manuscript, log into <https://mc.manuscriptcentral.com/rsos> and enter your Author Centre, where you will find your manuscript title listed under "Manuscripts with Decisions". Under "Actions," click on "Create a Revision." You will be unable to make your revisions on the originally submitted version of the manuscript. Instead, revise your manuscript and upload a new version through your Author Centre.

When submitting your revised manuscript, you will be able to respond to the comments made by the referees and upload a file "Response to Referees" in "Section 6 - File Upload". You can use this to document any changes you make to the original manuscript. In order to expedite the processing of the revised manuscript, please be as specific as possible in your response to the referees.

When uploading your revised files please make sure that you have:

- 1) A text file of the manuscript (tex, txt, rtf, docx or doc), references, tables (including captions) and figure captions. Do not upload a PDF as your "Main Document".
- 2) A separate electronic file of each figure (EPS or print-quality PDF preferred (either format should be produced directly from original creation package), or original software format)
- 3) Included a 100 word media summary of your paper when requested at submission. Please ensure you have entered correct contact details (email, institution and telephone) in your user account
- 4) Included the raw data to support the claims made in your paper. You can either include your data as electronic supplementary material or upload to a repository and include the relevant doi within your manuscript

5) All supplementary materials accompanying an accepted article will be treated as in their final form. Note that the Royal Society will neither edit nor typeset supplementary material and it will be hosted as provided. Please ensure that the supplementary material includes the paper details where possible (authors, article title, journal name).

Supplementary files will be published alongside the paper on the journal website and posted on the online figshare repository (<https://figshare.com>). The heading and legend provided for each supplementary file during the submission process will be used to create the figshare page, so please ensure these are accurate and informative so that your files can be found in searches. Files on figshare will be made available approximately one week before the accompanying article so that the supplementary material can be attributed a unique DOI.

Once again, thank you for submitting your manuscript to Royal Society Open Science and I look forward to receiving your revision. If you have any questions at all, please do not hesitate to get in touch.

Kind regards,  
Andrew Dunn  
Royal Society Open Science Editorial Office  
Royal Society Open Science  
[openscience@royalsociety.org](mailto:openscience@royalsociety.org)

on behalf of Prof Kevin Padian (Subject Editor)  
[openscience@royalsociety.org](mailto:openscience@royalsociety.org)

Associate Editor Comments to Author :

The reviewer is broadly satisfied with the scientific content of the paper, though they would prefer that you seek further English language support. Examples of professional services providing such advice may be found at <https://royalsociety.org/journals/authors/benefits/language-editing/>.

Reviewer comments to Author:  
Reviewer: 1

Comments to the Author(s)

I am generally pleased with changes included in this version of the manuscript. However, it would be great to carefully read some of the new sentences and improve them linguistically. For example check lines 312-319 and 363-368 (clean version) for missing words.

## Author's Response to Decision Letter for (RSOS-192177.R2)

See Appendix G.

## Decision letter (RSOS-192177.R3)

We hope you are keeping well at this difficult and unusual time. We continue to value your support of the journal in these challenging circumstances. If Royal Society Open Science can assist you at all, please don't hesitate to let us know at the email address below.

Dear Dr van der Hoek,

It is a pleasure to accept your manuscript entitled "Global relationships between tree-cavity excavators and forest bird richness" in its current form for publication in Royal Society Open Science.

You can expect to receive a proof of your article in the near future. Please contact the editorial office ([openscience\\_proofs@royalsociety.org](mailto:openscience_proofs@royalsociety.org)) and the production office ([openscience@royalsociety.org](mailto:openscience@royalsociety.org)) to let us know if you are likely to be away from e-mail contact -- if you are going to be away, please nominate a co-author (if available) to manage the proofing process, and ensure they are copied into your email to the journal.

Due to rapid publication and an extremely tight schedule, if comments are not received, your paper may experience a delay in publication. Royal Society Open Science operates under a continuous publication model. Your article will be published straight into the next open issue and this will be the final version of the paper. As such, it can be cited immediately by other researchers. As the issue version of your paper will be the only version to be published I would advise you to check your proofs thoroughly as changes cannot be made once the paper is published.

Please see the Royal Society Publishing guidance on how you may share your accepted author manuscript at <https://royalsociety.org/journals/ethics-policies/media-embargo/>.

Thank you for your fine contribution. On behalf of the Editors of Royal Society Open Science, we look forward to your continued contributions to the Journal.

Kind regards,  
Andrew Dunn  
Royal Society Open Science Editorial Office  
Royal Society Open Science  
[openscience@royalsociety.org](mailto:openscience@royalsociety.org)

on behalf of Prof Kevin Padian (Subject Editor)  
[openscience@royalsociety.org](mailto:openscience@royalsociety.org)

Follow Royal Society Publishing on Twitter: @RSocPublishing  
Follow Royal Society Publishing on Facebook:  
<https://www.facebook.com/RoyalSocietyPublishing.FanPage/>  
Read Royal Society Publishing's blog: <https://blogs.royalsociety.org/publishing/>

# Appendix A

## Global and universal relationships between tree-cavity excavators and forest bird richness

The overwhelming majority of tree-cavity excavators, among which woodpeckers are the most numerous group (van der Hoek, Gaona, & Martin, 2017), are forest or woodland birds. Indeed, general patterns of woodpecker richness correlate positively with amount of forest cover at the global scale (Ilsøe et al., 2017). However, many excavators are regarded as habitat specialists and have highly specific habitat requirements, among which the availability of dead wood is especially important (Hoyt & Hannon, 2002; Bütler, Angelstam, Ekelund, & Schlaepfer, 2004; Tikkanen et al., 2006). This group of birds utilizes large, live or decaying trees, or coarse woody debris, for nesting, roosting, and feeding. As a result, the prevalence of such attributes in a forest ecosystem may influence local richness and abundance of excavators (Martin & Eadie, 1999; Drever, Aitken, Norris, & Martin, 2008; Drever & Martin, 2010).

The strong attachment to specific forest elements, such as dead wood and large trees, makes excavators good indicators of the naturalness of ecosystems (Marchetti, 2004; Roberge & Angelstam, 2006; Virkkala, 2006; Drever et al., 2008; Drever & Martin, 2010), whereby their presence correlates strongly with other aspects of biodiversity (Mikusiński, Gromadzki, & Chylarecki, 2001; Nilsson, Hedin, & Niklasson, 2001; Angelstam et al. 2003). For example, studies in northern boreal and temperate regions revealed that many other forest birds respond similarly to habitat components required by woodpeckers, which leads to a strong correlation between woodpecker and forest bird richness and abundance at stand and landscape scales (Mikusiński et al., 2001; Roberge & Angelstam 2006; Drever et al., 2008). As a result, the responses of woodpeckers, and likely that of other tree-cavity-excavating birds (e.g.,

**Commented [MOU1]:** what is the difference between 'global' and 'universal'. There is nothing in the introduction, nor in the discussion, justifying the usage of these two words. I suggest to delete 'universal'

**Commented [MOU2]:** I see this paragraph as mostly unnecessary, with some of this information that can be fused with the second paragraph

**Commented [MOU3]:** you cited this article in the previous paragraph with the four authors, and here it is as 'et al.'. Please, correct where needed

**Commented [MOU4]:** you previously cited this article with the three authors, and here it is as 'et al.'. Please, correct where needed

26 barbets, trogons, nuthatches, and certain parrot species), to changes in forest habitats  
27 may be indicative of responses of forest bird communities in general (Drever & Martin,  
28 2010). Thus, excavators can be effective and efficient indicators at the forest ecosystem  
29 scale, and thus useful as conservation and management targets (Roberge, Mikusiński, &  
30 Svensson, 2008).

31 Excavators are not only reliable indicators of other forest birds by means of their  
32 associations with forest characteristics, but correlations between both groups of birds  
33 are also partially determined by species interactions. Taken together, these and non-  
34 excavator cavity nesters are linked into 'nest-webs' (sensu Martin and Eadie, 1999) of  
35 interacting species, which are structured by the availability and acquisition of tree-  
36 cavities formed by two major processes: 'natural formation', in which fungi decompose  
37 wood by fungi over an extended period, or animal excavation (Cockle, Martin, &  
38 Wesolowski, 2011; Cockle, Martin, & Robledo, 2012; Ruggera et al. 2016). Since most  
39 excavators—at least the majority of woodpeckers—excavate a new nest cavity each  
40 year, this mode of cavity creation steadily provides a large number of potential sheltered  
41 roosting and nesting sites for secondary-users: both for vertebrates (Cockle et al., 2012)  
42 and invertebrates (Tylianakis, Klein, Lozada, & Tschamtko, 2006; Powell, Costa,  
43 Lopes, & Vasconcelos, 2011). As a result, cavity formation by excavation is the main  
44 source of nest holes for species in many regions of the world (Cockle et al., 2011), and  
45 richness of cavity excavators is likely to be indicative of the richness of a broad range of  
46 non-excavating tree-cavity nesters. However, decay-formed cavities might be very  
47 common in other regions, especially the tropics, and it is very likely that the relative  
48 importance of both processes of cavity formation—and thus the strength of the  
49 relationship between excavator richness and non-excavator richness—varies globally  
50 (Cockle et al., 2011).

**Commented [MOU5]:** I am not aware of this. I've seen some parrot species burrowing their own cavities in termite mounds and cliffs, or 'arranging' cavities already done by woodpeckers or fungi. But I have not seen/heard about parrots excavating 'brand new' cavities in trees. Please, could you add a reference for that?

**Commented [MOU6]:** I see this extrapolation from responses of a very specific bird group (i.e. cavity nesters) to responses of the whole forest bird community, a bit pretentious. Drever & Martin did not find that association either, as can be seen in their summary: "Recent studies indicated that species richness of woodpeckers was correlated with richness of all forest birds, thus suggesting potential exists for management practices that can address needs of woodpeckers in particular and other forest birds in general... These results, combined with previously identified positive correlations between woodpecker and forest bird richness, indicate woodpeckers can be managed as a suite for the purpose of managing avian biodiversity as a whole."

Besides, most of these extrapolations were done in north temperate forests (NA and Europe), which are structurally simpler than tropical forests. For example, excavators and understory birds might have similar responses to logging in north temperate forests, but different responses in tropical and subtropical forests. If the article is focused at a global scale, these considerations need to be taken into account.

So, unless you have a better argumentation for this association at a global scale, I suggest to delete this part

**Commented [MOU7]:** This is not what Cockle et al. (2011) found. According to the map in the Figure 2a, you can see that the pattern that you mention (excavated cavities as main source for non-excavator birds) is only strong in North America, very weak in Europe (only 1 out of 4 studies showed that pattern), and opposite in South America and Australia, this is, non-excavator birds mainly used decay-formed cavities (there is no study in Africa). After Cockle et al. (2011), Ruggera et al. (2016) quoted "Therefore, in the PF woodpeckers do not seem to play a key role in provisioning cavities to the nest-web, a pattern also shown for other South American and some European forests, and contrary to the findings in North America (Cockle et al., 2011a,b; Pereira et al., 2009; Wesolowski, 2007)."

Please, be careful when citing other authors, and put strictly what they have found

51 Finally, it is worth noting that ~~the diversity of excavators can be indicative of other~~  
52 ~~groups of species as~~ excavators can ~~be habitat engineers which~~ facilitate foraging of  
53 other bird species by perforating the bark of trees to expose insects or sap (Bull &  
54 Jackson, 1995; Montellano, Blendinger, & Macchi, 2013) and ~~which~~ play a role in the  
55 dispersal of fungi which leads to wood softening, thus further aiding in the provision of  
56 potential nest-cavities (Jusino et al., 2016).

Commented [MOU8]:

57 Local studies of cavity-nesting birds and their ~~community~~ interactions are largely  
58 biased towards temperate zones, and only a few authors have explored global variation  
59 in nest-web characteristics or addressed how such variation should be taken into  
60 account when considering cavity-nester communities in forest conservation or  
61 management (e.g., Cockle et al., 2011; [Ruggera et al. 2016](#)). Given the significant role

Commented [MOU9]: I see this unnecessary at this point

62 that woodpeckers and other excavators play in forest ecosystems across most of the  
63 world, we might predict that these birds could be reliable indicators of avian diversity  
64 and richness not only at local and regional scales (Mikusiński et al., 2001; Martin,  
65 Ibarra, & Drever, 2015), but also at a global scale. Therefore, the aim of the present

Commented [MOU10]: Please, see the previous comment on this pattern. Actually, it seems that woodpeckers play a considerably smaller role than that you stated, as cavity-providers in many non-disturbed ecosystems

66 study is to investigate whether there are consistent patterns in the relationships between  
67 avian tree-cavity excavators (hereafter: excavators) and species richness of ~~non-~~  
68 ~~excavating tree-cavity nesters (hereafter: non-excavators),~~ forest specialist species, and

Commented [MOU11]: If my previous comment is correct, how is this prediction held?

69 forest birds in general, across the globe. Given the important role of excavators in forest  
70 ecosystems, we expect that non-excavator, forest specialist, and forest bird richness will  
71 generally increase with the number of excavators present in the ecosystem, regardless of  
72 the ecosystem or location. However, we also predict that the strength of the relationship  
73 between excavators and richness of other forest birds will vary across zoogeographic  
74 regions, following indications that the richness of different groups of tree-cavity nesting  
75 birds (excavators, non-excavators) varies substantially across the world (van der Hoek

Commented [MOU12]: I see necessary to call to this group with something that recalls that are cavity users, because both forest specialist species and forest birds in general include also non-excavator bird species. An option can be 'secondary cavity-nesters'

Commented [MOU13]: Here or in Methods: it's necessary to clarify if these categories are mutually exclusive. For example, some secondary cavity-nesters are forest specialists, and of course, are also forest birds in general. These species are considered in the three categories or only in the 'non-excavator' category? How this nested data set would eventually influence your results?

76 et al., 2017). If previously observed relationships between cavity-excavators and other  
77 forest birds scale up from local forest stands or ecosystems to zoogeographic or global  
78 levels, then this strengthens the potential of tree cavity-excavators as both indicators and  
79 management surrogates.

Commented [MOU14]: what about the other two bird groups?

## 80 81 **Material and Methods**

82 We used published global distribution maps of tree-cavity nesting birds (van der Hoek  
83 et al., 2017) and forest birds (Betts et al., 2017) to extract richness estimates per 10×10  
84 km grid cell. Maps for both tree-cavity nesters and forest birds were based on the same  
85 species range maps provided by BirdLife International and NatureServe (2015). Bird  
86 species were classified in: 1) excavators: XXXXXX; 2) non-excavators: all birds known  
87 to nest in tree cavities but which do not excavate their cavities, most of which are forest  
88 birds; 3) forest specialists: birds that make exclusive use of forest; and 4) forest birds in  
89 general: birds that use forest habitat and at least one other type of habitat. We used only  
90 range polygons where a species' presence was classified as 'Extant' or 'Probably  
91 extant', and assigned 'presence' to all grid cells that overlapped with range polygons.

Commented [MOU15]: I suggest to deeply restructure the introduction: 1) a first paragraph that talks in general about the relationship of excavators with other birds (fusion of the first two paragraphs); 2) Exclusive paragraphs for each excavator relationship with each of the other 3 groups of birds. In each paragraph express what is known and what is the relationship predicted by the authors, and how they think that these relationships may vary in relation to the biogeographic regions considered. Another option is that the geographical variations of the relationships are expressed together in a separate paragraph.

On the other hand, I think that it must necessarily be emphasized and made clear, what is the novelty provided by this study, in comparison with other studies cited in the same introduction and that address comparisons very similar to those of this study (eg Drever et al. 2008, Mikusinski et al 2001, Virkkala 2006).

92 Next, we created generalized least squares (gls) models to assess the linear relationships  
93 between ~~excavators and the other bird categories~~ ~~excavators and all forest birds (birds~~  
94 ~~classified as using forest exclusively and those using forest habitat and at least one other~~  
95 ~~type of habitat; hereafter: forest birds), all forest specialists (birds classified as making~~  
96 ~~exclusive use of forest by Betts et al. (2017)), or all non-excavating cavity-nesters (all~~  
97 ~~birds known to nest in tree cavities but which do not excavate their cavities, most of~~  
98 ~~which are forest birds; hereafter: non-excavators)~~. To take biogeographical differences  
99 into account, we proceeded to separate trends across the globe, and created gls models

Commented [MOU16]: I find necessary to clearly define the categories of bird groups you use. I tried to do this by copy-and-paste some information you wrote below. However, I don't know if I did it correct, and the definition of 'excavator' group is missing. Please, check it and correct it. Yet, something is not clear to me, Can a given bird species be part of more than one group? If the answer is yes, how that influences on results?

Commented [MOU17]:

100 for the six zoogeographic regions separately (Nearctic, Palearctic, Neotropical,  
101 Afrotropical, Oriental, and Australasia).

102 As our data were spatially structured, we followed similar protocols to adjust for  
103 spatial autocorrelation as per Storch et al. (2006). This implied the use of GLS models with  
104 an exponential spatial covariance structure, as these models had the best fit in  
105 preliminary tests, which reduced—rather than eliminated—the influence of spatial  
106 autocorrelation on our models. In these tests, exponential GLS models consistently had  
107 the lowest Akaike's Information Criterion (AIC) value compared to a set of models,  
108 including an ordinary least squares model with no spatial structure, and GLS models with  
109 Gaussian, linear, rational quadratics and spherical spatial covariance structures.

110 Even though GLS models work well with large datasets, we found that GLS models  
111 fitted on all data failed to converge (using the R package “nlme” (Pinheiro et al., 2016)).  
112 To circumvent this computational problem, we first grouped grid cells by  
113 zoogeographic region. We thereafter ran 1000 models on bootstrap permutations of  
114 1000 randomly selected grid cells (see Kissling, Sekercioglu, & Jetz, 2012; Ilsøe et al.,  
115 2017). Of these 1000 model iterations, we subsequently calculated the mean ( $\pm$ SD),  
116 minimum and maximum coefficients of the regression slope. Next, we obtained a  
117 measure of the strength of each correlation by fitting each exponential GLS model to a  
118 different, non-overlapping, test data set of 1000 randomly selected grid cells. We then  
119 proceeded to calculate the Spearman rho coefficient of the correlation between  
120 predicted and observed data, for all 1000 models per zoogeographic region. Finally, we  
121 calculated the mean Spearman rho of all significant models per zoogeographic region.  
122 We repeated all of these analyses for woodpeckers as a subset of the excavators. All  
123 data, R scripts, and initial results needed to reproduce our analyses presented here are  
124 deposited online (Appendix S1).

**Commented [MOU18]:** I find necessary to clarify some 'ecological' issues (i.e. not statistical) in methods. 1) Did you include the whole area of each biogeographic zone? or 2) only the forest areas in each one of them?  
If (1): How do you think the different amount of area/forest area of each biogeographic zone can influence your results? How non-forest excavators (as some woodpeckers) can influence your results? or did you exclude them?  
Another question: given the consideration of Palearctic and Oriental regions, what does the AUSTRALASIA region includes? what part of Asia?

**Commented [MOU19]:** What did you specifically model? which were the variables?

**Commented [MOU20]:** I am not an specialist in this kind of analyses, and I could not fully understand it. Given that many readers of this kind of papers are not specialists either, I find very important to better explain this methodological part. What are the predicted and what the observed data? What does tell us the regression slopes and what the mean spearman rho?

Nevertheless, at this point, I have the impression that you modeled the richness of non-excavators and forest birds, relative the presence of excavators (explanatory variable), i.e. in a causal manner (= GLS models). However, in the introduction this relationship was mostly raised in a correlational manner, this is, that both excavators and the other forest bird groups show similar responses to forest structure and disturbances. Exceptions to this correlational relationship are, for example, the FEW cases (in terms of global areas) in which excavators are essential for non-excavators by providing new cavities or food resources (sap and insects in excavator perforations). In short, you are analysing a relationship that you mostly posted as correlational, with regression models. Please, if my reasoning is incorrect, just ignore it, but explain better the methodology.



125

## 126 Results

127 ~~We distilled global patterns in the r~~Relationships between excavator richness and that of  
 128 non-excavators, all forest birds, and forest specialists (Fig. 1), ~~though relationships~~  
 129 differed in relative strength and regression slope, ~~and also according to depending on~~  
 130 ~~the group of birds and the~~ zoogeographic region analysed (Fig. 2, Table 1). ~~For~~  
 131 ~~example, the R~~relationships between excavators and non-excavators and forest-  
 132 associated birds were typified by particularly steep regression slopes in the Neotropics  
 133 ~~and the other~~ predominantly tropical regions (~~: Neotropical Afrotropical and Oriental~~).

134 In the Neotropics, the presence of one additional excavator species in a grid cell implied  
 135 an increase of more than two additional non-excavators, ten forest bird species, or four  
 136 forest specialists. In contrast, regression slopes were less steep in predominantly  
 137 temperate and boreal regions such as the Nearctic and Palearctic, where an increase of  
 138 one excavator species signified an increase of approximately one non-excavator species,  
 139 four to five forest birds, or one forest specialist. Similar to variation in the slopes of the  
 140 regressions, we found differences in the strength (as represented by Spearman's rho) of  
 141 these relationships, with again stronger relationships in the predominantly tropical  
 142 Afrotropical, Oriental, and Neotropical regions than in the comparably more  
 143 temperate/boreal Nearctic and Palearctic regions (Table 1).

144 Although the relationships between excavators and the other three ~~bird groups of cavity-~~  
 145 ~~nesting and forest-associated birds~~ were generally similar in nature (positive), there  
 146 were some differences in the relative strength of these relationships across  
 147 zoogeographic regions. For example, excavator richness was a particularly strong  
 148 predictor of non-excavator richness and of all forest birds in the Oriental region ( $\rho =$   
 149 0.88 and 0.86, respectively), and slightly less so for forest specialists ( $\rho = 0.77$ ),

**Commented [MOU21]:** I find Figures 1 and 2 redundant, given that in Fig. 1 you detailed ellipses for each of the six zoogeographic region. I'd say that you can leave only the figure 2 and nothing will be lost.

**Commented [MOU22]:** what does mean this category? specialists? all forest birds? both? you should be consistent with category names

**Commented [MOU23]:** I wouldn't say that Afrotropical and Oriental zones have also 'particularly steep slopes'. For example, in Table 1 can be seen that Australasian slopes are all steeper than Afrotropical and Oriental slopes. Also, Nearctic and Palearctic slopes of non-excavator are equal or steeper than that of Oriental, respectively; and that of forest specialist birds are also steeper or equal than that of Afrotropical, respectively. SO, the pattern you wrote is not as clear as you suggest.

**Commented [MOU24]:** It's hard to follow your reasoning. It seems like sometimes your reasoning is associative/correlative (e.g. both excavators and other groups of forest birds have similar responses to disturbances), other times it is explanatory (e.g. the excavator richness determines the richness of other non-excavator cavity-users by providing new cavities), and here it is predictive: the addition of 1 excavator species implies the addition of X forest bird species, ignoring any other type of causes, such as phylogenetic, biogeographical, etc. You must decide which of these visions you are going to explore, or clearly establish that all of them will be analysed, with their respective methodologies and theoretical support

**Commented [MOU25]:** What exactly does the Rho (=strength) mean in this context? low values of Rho mean that the relationships are not very reliable? for example in australasian region. And more important, what would be the joint interpretation of the slopes, the percentage of models with p greater than 0.5 and the rho?

150 whereas excavator richness in the Afrotropics showed a strong relationship with all  
151 forest birds ( $\rho = 0.94$ ) and with forest specialists ( $\rho = 0.88$ ), but a somewhat weaker  
152 association with non-excavators ( $\rho = 0.79$ ).

153 We repeated all analyses for woodpeckers as a subset of excavators and found nearly  
154 identical results, with again significant positive relationships between woodpeckers and  
155 other groups of cavity-nesting or forest-associated birds in all regions but Australasia,  
156 and with steeper regression slopes and stronger relationships in the predominantly  
157 tropical Neotropical, Oriental and Afrotropical regions as compared to more shallow  
158 slopes and weaker associations in the Nearctic and Palearctic (Table 2). The relative  
159 strength of the relationships between woodpeckers and the three other groups of cavity-  
160 nesting and forest-associated birds did again depend on the zoogeographic region (in  
161 similar ways as for excavators), and woodpeckers were equally strong predictors of the  
162 richness of other birds as excavators in general, with the notable exception of  
163 Australasia. In this region, excavators showed a weak ( $\rho = 0.69$ ) but often significant  
164 ( $p < 0.05$  in 97 percent of model iterations) positive relationship with forest specialists,  
165 whereas no clear relationship emerged between woodpeckers and forest specialists ( $\rho$   
166  $= -0.08$ ).

167

## 168 **Discussion**

169 We found strong positive relationships between excavators/woodpeckers and non-  
170 excavators, forest birds and forest specialists at global and zoogeographic scales,  
171 although these relationships differed in both strength and characteristics (regression  
172 slopes) across zoogeographic regions. Our results imply that excavators and  
173 woodpeckers (a predominant subset of excavators) hold potential as indicators and  
174 management surrogates across most of the world (Hunter Jr et al., 2016), but also that

**Commented [MOU26]:** I did not understand the difference between the global and the zoogeographic scale of analysis. That is why I suggested that figures 1 and 2 are redundant. Furthermore, there are not numerical results for the global scale of analysis. So, I'd suggest to better clarify these results

175 we have to take differences among zoogeographic regions into account if we are going  
176 to adopt these surrogates for conservation or management. Furthermore, the  
177 zoogeographic variation among nest-web assemblages hints at underlying differences in  
178 factors ranging from broad-scale patterns in evolutionary history (e.g., speciation) to  
179 more local-scale variation in ecosystem characteristics and species traits (e.g., tree  
180 cavity availability and a species' level of habitat specialization).

**Commented [MOU27]:** I would like to read what are those differences to take into account from a practical point of view

181 Many excavators, woodpeckers included (~~hereafter excavators/woodpeckers~~), have  
182 strong preferences for specific forest elements, such as dead and decaying trees or  
183 particularly large trees (e.g., Tikkanen et al. 2006). In turn, these elements, and the  
184 processes that drive their presence and abundance, are of great importance to habitat  
185 formation and create additional niche space to support many groups of organisms  
186 (Stokland, Siitonen, & Jonsson, 2012). Therefore, we can expect that forests that meet  
187 the habitat requirements of excavators (e.g., certain levels of availability of decaying  
188 and dead wood) provide high quality habitat for many other organisms. This may  
189 explain higher richness of forest birds (especially forest specialists) in areas occupied by  
190 high numbers of excavators/woodpeckers. For non-excavating species that utilize tree-  
191 cavities for their nests, this relationship may be enhanced by the fact that  
192 excavators/woodpeckers create or facilitate potential nest substrates (Martin & Eadie,  
193 1999). In other words, the strong habitat preferences of many excavators/woodpeckers,  
194 as well as the facilitatory role excavators play in providing nest substrates, make these  
195 birds potential indicators of many forest-associated species and, by extension, of high-  
196 quality forests (i.e., natural, old growth; Drever et al. 2008).

**Commented [MOU28]:** The comment on nest-webs here, in the first paragraph of Discussion, is out of context. Besides, variation among nestwebs... in relation to what? Are you trying to relate the association of excavators and other forest birds with variations in nestweb characteristics? it's far from clear, and you are leaving out a key aspect: the diversity, persistence and characteristics of trees with cavities

197 The steep slopes we found for correlations between excavators/woodpeckers and  
198 other forest birds in the predominantly tropical regions (Neotropics, Oriental,  
199 Afrotropical) contrast to more shallow slopes in the temperate/boreal regions

**Commented [MOU29]:** However, in several other nestwebs (for example in South America [Cockle et al. 2012, Ruggera et al. 2016] and India [Manikandan & Balasubramanian 2018]), most non excavator birds mainly use decay-formed cavities in living trees. Only 10-25% of interactions (including excavator interactions) are made with snags. So, the evidence to date (even in the Neotropics, where your results showed the strongest association between excavators and non-excavators), would not be explained by the number of snags or the amount of woodpecker-excavated cavities. Also, you need to better explain why forest specialist birds would benefit from the presence of 'certain levels (how much?) of availability of decaying and dead wood'

200 (Palearctic, Nearctic). Macro-scale processes (e.g., as outlined by Gaston, 2000), such  
 201 as speciation events, are likely to account for some of these differences among  
 202 zoogeographic regions. First, overall species richness of birds (Blackburn & Gaston,  
 203 1996), including cavity-nesting birds (van der Hoek et al., 2017), and also of trees as  
 204 potential substrates for cavities (Currie & Paquin, 1987), differs both among and within  
 205 zoogeographic regions, likely inducing differences in nest-web assemblages (see e.g.  
 206 Cockle et al. (2012) for global differences in nest-web characteristics). However,  
 207 variation in species composition and associated variation in functional richness (i.e.  
 208 variety of functional traits), more than richness per se, is likely to contribute most to  
 209 spatial variation in nest-web assemblages across global scales. For example, the  
 210 Australasian region lacks the presence of Piciformes, the Order to which nearly 75% of  
 211 excavators belong (van der Hoek et al., 2017), whereas speciation processes have led to  
 212 a relatively high diversity of Piciformes in southeast Asia (Benz, Robbins, & Peterson,  
 213 2006). Given that we found nearly similar results for woodpeckers and excavators as a  
 214 larger group that includes e.g., barbets, except for in Australasia, we hereafter discuss  
 215 these jointly as ‘excavators’.

216 We hypothesize that observed spatial variation in the relationships between  
 217 excavators and other forest birds within zoogeographic regions stems more from local  
 218 differences in habitat and vegetation characteristics (e.g. tree species composition and  
 219 climatic variables (Huston, 1999), as well as tree cavity availability and their  
 220 formation agents (Remm & Löhms 2011)) rather than from speciation processes. Such  
 221 differences would for example explain how in the Neotropics, cavity-nesting  
 222 assemblages studied in the temperate mountain forests of Chile had a 1:6 ratio of  
 223 excavators (4 species) to non-excavators (25 species; Altamirano, Ibarra, Martin, &  
 224 Bonacic, 2017) whereas a subtropical Atlantic moist forest supported relatively higher

**Commented [MOU30]:** differences in relation to what of the nestwebs? you need to be more specific

**Commented [MOU31]:** You need to better explain this: how speciation and other macro-scale processes across the globe influence on the results you found. Explanations generally are biased to nestwebs. However, you have other bird groups that not necessarily are cavity-nesters. Also, you don't necessarily have to invoke networks (of which there are relatively few reports worldwide) to talk about cavity-nesters (of which there are comparatively many more reports around the world)

**Commented [MOU32]:** Again, 1) variation in relation to what of the nestwebs? you need to be more specific. And 2) Explanations generally are biased to nestwebs, you don't need to invoke networks to talk about cavity-nesters

**Commented [MOU33]:** Australasia region doesn't lack Piciformes. As you say a few words later, SE Asia has a high diversity of Piciformes. So, be careful when you explain Australasia results as a unique region (see comment also about AUSTRALASIA in methods). In fact, I would like to find a better explanation of the results of the Australasian region, since it had the most contrasting results with the rest of the regions.

**Commented [MOU34]:** I honestly lost the point of the paragraph. I do not see a concrete explanation or discussion of some aspect of the reported results. I did not understand why the tropical regions had deeper slopes (although, see comment on results on the criticism of this pattern), I did not understand how to explain the flatter slopes of the temperate / cold regions of the north, nor did I find a convincing explanation of the contrasting results of the Australasian region

**Commented [MOU35]:** What are these 'within' variations? In results, you have always emphasized differences 'between' zoogeographic regions. Please, explain better

225 numbers of excavators with a 1:3 ratio of excavators (9) to non-excavators (25) (Cockle  
226 et al., 2012). Similarly, we can hypothesize that at least some variation at regional  
227 scales stems from differences in the propensities for re-use of excavated cavities by  
228 non-excavators. For example, proportions of decay-formed cavities used are particularly  
229 high in parts of the world with high amounts of precipitation (e.g., most of the wet  
230 tropics), a reflection of fungal growth, and lower in anthropogenically disturbed  
231 landscapes than in primary forests (Remm & Löhmus, 2011). In turn, a high availability  
232 of decay-formed cavities might allow for a relatively high non-excavator richness, with  
233 fewer species dependent on excavators for the supply of nest-cavities. For example,  
234 even woodpeckers, commonly considered primary excavators, occasionally use decay-  
235 formed cavities in Neotropical temperate rainforests where tree decay is the key driver  
236 of nest-web structure (Altamirano et al., 2017). Finally, we find that relatively higher  
237 numbers of non-excavators, or cavity-nesters in general, may occur in regions where  
238 many species are habitat generalists that utilize other nest substrates than tree-cavities  
239 (e.g., 40% of cavity nesters in Neotropical temperate forests are facultative users of tree  
240 cavities for nesting; Altamirano et al., 2017), as compared to regions where most cavity  
241 nesters are obligate tree-cavity users (e.g., over 85% of cavity nesters in temperate  
242 Nearctic forests; Wesolowski & Martin, 2018). Finally, it is worth noting that cavity  
243 availability and use are also likely to be influenced by cavity persistence (longevity), a  
244 characteristic that can have considerable spatial variation due to factors such as land use  
245 patterns (e.g., logging), climatic factors (e.g., rainfall), and cavity characteristics (e.g.,  
246 whether they are located in live or dead trees; e.g., Edworthy, Wiebe, & Martin, 2012;  
247 Cockle, Martin, & Bodrati, 2017).

248 We detected relative differences in strengths among the relationships between  
249 excavators/woodpeckers and non-excavators, forest birds, and forest specialists across

**Commented [MOU36]:** what differences? you have not established what are the differences along the neotropical region in terms of climatic variables, tree species composition, tree availability and their formation agents. Also, include in this comparison the work by Ruggera et al. 2016, how their results fit in the explanation your trying to develop?

**Commented [MOU37]:** variation of what?

**Commented [MOU38]:** then, if non-excavators do not 'need' excavators as cavity-forming agents, why did they show the greatest association in richness in the Neotropics?

**Commented [MOU39]:** Also, Lammertink et al. 2019. Helmeted Woodpeckers roost in decay-formed cavities in large living trees: a clue to an old-growth forest association. Condor 121:1-10 DOI: 10.1093/condor/duy016

**Commented [MOU40]:** Altamirano et al. 2017 wrote: 'Among SCNs, ten species (40%) were obligate and 15 (60%) were non obligate cavity nesters. Non obligate cavity nesters included six (24%) facultative, five (20%) marginal, and four (16%) incidental SCN'. If we include also PCN, facultative cavity nesters are 20%.

**Commented [MOU41]:** how are they influenced? Again, I lost the point. You began talking about 'spatial variation in the relationships between excavators and other forest birds within zoogeographic regions', but then you focused (again) only on excavators and non-excavators, especially in the Neotropics.

250 zoogeographic regions. These differences were most likely to stem from the same  
251 variation among species and ecosystem characteristics discussed above (e.g., the  
252 distribution and relative importance of cavity forming agents), and indicate that richness  
253 of excavators/woodpeckers may be a better indicator of richness of other cavity and  
254 forest-associated species in one region than in another. In addition, the relative strength  
255 of relationships between excavators and other forest birds might reflect whether  
256 excavators are indicative of the richness of other species due to shared associations with  
257 particular forest elements (indirect association), due to their direct facilitation of nest  
258 cavities (direct facilitation), or whether both factors play a role. For example, we found  
259 that relationships between excavator and forest bird or forest specialist richness in the  
260 Afrotropics are relatively strong, whereas the relationship between excavators and non-  
261 excavators is comparatively weaker. This might indicate that, in the Afrotropics,  
262 excavators are especially strong predictors of other groups of forest-associated birds  
263 through their mutual habitat requirements, rather than through their direct facilitation of  
264 tree-cavities. In contrast, excavators are relatively stronger predictors of non-excavators  
265 in the Oriental region, which might lead to hypotheses that excavators play a more  
266 direct, nest-web structuring role through the provision of cavities in the Oriental region.  
267 Some non-excavators might use cavities created by multiple excavator species,  
268 whereas others predominantly use cavities formed by processes of degradation, damage  
269 or insect activity (Martin & Eadie 1999; Cockle et al., 2012; Ruggera et al., 2016). In  
270 addition, certain excavators might be especially abundant or provide cavities that are  
271 very commonly reused by several species, whereas others are scarce and leave only a  
272 few short-lived cavities that would not be generally available for use by non-excavators.  
273 Given such complexities among nest-web interactions, it is important to emphasize that  
274 we present general global patterns in the composition of tree-cavity-using assemblages

**Commented [MOU42]:** in which ones?

**Commented [MOU43]:** I believe that this is a central point, that it should be better developed in the introduction, and that the methodology should be chosen according to that. It is not the same to analyze something in a correlative way, that in an explanatory or predictive way

**Commented [MOU44]:** This does not make sense to me. The relationship is weak, and you argue that it is because they have similar requirements. However, if they have similar habitat requirements, it would not be logical to think that their richness should vary in a similar way?

**Commented [MOU45]:** however, see Manikandan & Balasubramanian 2018. Sequential Use of Tree Cavities by Birds and Nest Web in a Riparian Forest in Southwest India. Acta Ornithologica, 53(1):49-60.

**Commented [MOU46]:** All this is vague and inconclusive: it may be this but it may also be the other

275 (i.e., communities of linked species that often interact within networks), and do not  
276 provide evidence for direct causal links between the presence of one group of species  
277 and another or direct evidence of species interactions at the zoogeographic regional  
278 scale.

Commented [MOU47]: I do not see an important point in this paragraph. I suggest to erase it completely

279 Excavators, of which woodpeckers are an important subset, appear to be useful  
280 indicator species for forest bird diversity at multiple spatial scales, across the world.

Commented [MOU48]: which ones? you only analysed at the zoogeographic scale

281 They form a small and fairly easy to identify ~~(even by citizen scientists)~~ subset of the a  
282 larger group of species (forest birds), often studied to understand the effects of  
283 anthropogenic disturbances. Studies of excavators (or woodpeckers specifically),  
284 especially in high biodiversity tropical regions, might provide quick measures of forest  
285 quality and biodiversity. A comprehensive study of all forest birds in some regions like  
286 Amazon or Congo basin would require considerable local expertise and training, which  
287 is often difficult to achieve due to social and monetary limitations. Thus, we conclude,  
288 excavators have excellent potential as study subjects for conservation monitoring and  
289 planning initiatives, in comparative research, and to guide the establishment of region-  
290 wide forest conservation strategies, especially in the largely understudied tropical  
291 regions of the world.

292

### 293 Acknowledgments

294 We would like to thank Lisa Manne, and Kristina Cockle for their critical remarks on  
295 drafts of this article.

296

### 297 References

298 **Altamirano**, T. A., Ibarra, J. T., Martin, K., & Bonacic, C. (2017). The conservation  
299 value of tree decay processes as a key driver structuring tree cavity nest webs in

300 South American temperate rainforests. *Biodiversity and Conservation*, 26(10),  
301 2453-2472.

302 **Angelstam**, P. K., Bütler, R., Lazdinis, M., Mikusiński, G., & Roberge, J. M. (2003;  
303 **January**). Habitat thresholds for focal species at multiple scales and forest  
304 biodiversity conservation—dead wood as an example. In *Annales zoologici fennici*  
305 (pp. 473-482). Finnish Zoological and Botanical Publishing Board.

306 **Benz**, B. W., Robbins, M. B., & Peterson, A. T. (2006). Evolutionary history of  
307 woodpeckers and allies (Aves: Picidae): placing key taxa on the phylogenetic tree.  
308 *Molecular phylogenetics and evolution*, 40(2), 389-399.

309 **Betts**, M. G., Wolf, C., Ripple, W. J., Phalan, B., Millers, K. A., Duarte, A., ... & Levi,  
310 T. (2017). Global forest loss disproportionately erodes biodiversity in intact  
311 landscapes. *Nature*, 547(7664), 441.

312 BirdLife International, & NatureServe (2015). *Bird species distribution maps of the*  
313 *world*. Cambridge and Arlington: BirdLife International and NatureServe.

314 **Blackburn**, T. M., & Gaston, K. J. (1996). Spatial patterns in the species richness of  
315 birds in the New World. *Ecography*, 19(4), 369-376.

316 **Bull** E.L., & Jackson, J.A. (1995). Pileated Woodpecker (*Dryocopus pileatus*). No. 148.  
317 In A. Poole, & F. Gill (Eds.), *The birds of North America*. Washington DC: The  
318 Academy of Natural Sciences & The American Ornithologists' Union.

319 **Bütler** R., Angelstam P., Ekelund P., & Schlaepfer R. (2004). Dead wood threshold  
320 values for the three-toed woodpecker presence in boreal and sub-Alpine forest.  
321 *Biological Conservation*, 119, 305-318.

322 **Cockle**, K. L., Martin, K., & Bodrati, A. (2017). Persistence and loss of tree cavities  
323 used by birds in the subtropical Atlantic Forest. *Forest ecology and management*,  
324 384, 200-207.

**Commented [MOU49]:** Sometimes, there's a -, and sometimes there's a . Please, use only one



325 **Cockle**, K. L., Martin, K., & Wesolowski, T. (2011). Woodpeckers, decay, and the  
326 future of cavity-nesting vertebrate communities worldwide. *Frontiers in Ecology*  
327 *and the Environment*, 9(7), 377-382.

328 **Cockle**, K. L., Martin, K., & Robledo, G. (2012). Linking fungi, trees, and hole-using  
329 birds in a Neotropical tree-cavity network: Pathways of cavity production and  
330 implications for conservation. *Forest Ecology and Management*, 264, 210-219.

331 **Currie**, D. J., & Paquin, V. (1987). Large-scale biogeographical patterns of species  
332 richness of trees. *Nature*, 329(6137), 326.

333 **Drever**, M. C., & Martin, K. (2010). Response of woodpeckers to changes in forest  
334 health and harvest: Implications for conservation of avian biodiversity. *Forest*  
335 *ecology and management*, 259(5), 958-966.

336 **Drever**, M. C., Aitken, K. E., Norris, A. R., & Martin, K. (2008). Woodpeckers as  
337 reliable indicators of bird richness, forest health and harvest. *Biological*  
338 *conservation*, 141(3), 624-634.

339 **Edworthy**, A. B., Wiebe, K. L., & Martin, K. (2012). Survival analysis of a critical  
340 resource for cavity-nesting communities: patterns of tree cavity longevity.  
341 *Ecological Applications*, 22(6), 1733-1742.

342 **Gaston**, K. J. (2000). Global patterns in biodiversity. *Nature*, 405(6783), 220.

343 Hoyt, J. S., & Hannon, S. J. (2002). Habitat associations of black-backed and three-toed  
344 woodpeckers in the boreal forest of Alberta. *Canadian Journal of Forest Research*,  
345 32(10), 1881-1888.

346 **Hunter** Jr, M., Westgate, M., Barton, P., Calhoun, A., Pierson, J., Tulloch, A., ... &  
347 Heino, J. (2016). Two roles for ecological surrogacy: Indicator surrogates and  
348 management surrogates. *Ecological Indicators*, 63, 121-125.

349 **Huston**, M. A. (1999). Local processes and regional patterns: appropriate scales for  
350 understanding variation in the diversity of plants and animals. *Oikos*, 393-401.

351 **Ilsøe**, S. K., Kissling, W. D., Fjeldså, J., Sandel, B., & Svenning, J. C. (2017). Global  
352 variation in woodpecker species richness shaped by tree availability. *Journal of*  
353 *biogeography*, 44(8), 1824-1835.

354 **Jusino**, M. A., Lindner, D. L., Banik, M. T., Rose, K. R., & Walters, J. R. (2016).  
355 Experimental evidence of a symbiosis between red-cockaded woodpeckers and  
356 fungi. *Proceedings of the Royal Society B: Biological Sciences*, 283(1827),  
357 20160106.

358 **Kissling**, W. D., Sekercioglu, C. H., & Jetz, W. (2012). Bird dietary guild richness  
359 across latitudes, environments and biogeographic regions. *Global Ecology and*  
360 *Biogeography*, 21(3), 328-340.

361 **Marchetti**, M. (Ed.). (2004). *Monitoring and indicators of forest biodiversity in Europe*  
362 *– from ideas to operationality*. Joensuu, Finland: European Forest Institute

363 **Martin**, K., & Eadie, J. M. (1999). Nest webs: a community-wide approach to the  
364 management and conservation of cavity-nesting forest birds. *Forest Ecology and*  
365 *Management*, 115(2-3), 243-257.

366 **Martin** K., Ibarra J.T., & Drever, M. (2015). Avian surrogates in terrestrial ecosystems:  
367 theory and practice. In D. Lindenmayer, P. Barton P, & J. Pierson (Eds.), *Indicators*  
368 *and Surrogates in Ecology, Biodiversity and Environmental Management* (pp. 33-  
369 34). Melbourne & London: CSIRO Publishing & CRC Press.

370 **Mikusinski**, G., Gromadzki, M., & Chylarecki, P. (2001). Woodpeckers as indicators of  
371 forest bird diversity. *Conservation biology*, 15(1), 208-217.

372 **Montellano**, M. G. N., Blendinger, P. G., & Macchi, L. (2013). Sap consumption by the  
373 White-fronted Woodpecker and its role in avian assemblage structure in dry forests.  
374 *The Condor*, 115(1), 93-101.

375 **Nilsson**, S. G., Hedin, J., & Niklasson, M. (2001). Biodiversity and its assessment in  
376 boreal and nemoral forests. *Scandinavian Journal of Forest Research*, 16(S3), 10-  
377 26.

378 **Pinheiro** J., Bates D., DebRoy S., Sarkar D., Heisterkamp S., Van Willigen B., &  
379 Maintainer, R. (2016). Package “nlme.” Available from [https://cran.r-](https://cran.r-project.org/web/packages/nlme/nlme.pdf)  
380 [project.org/web/packages/nlme/nlme.pdf](https://cran.r-project.org/web/packages/nlme/nlme.pdf) (accessed January 15, 2018).

381 **Powell**, S., Costa, A. N., Lopes, C. T., & Vasconcelos, H. L. (2011). Canopy  
382 connectivity and the availability of diverse nesting resources affect species  
383 coexistence in arboreal ants. *Journal of Animal Ecology*, 80(2), 352-360.

384 **Remm**, J., & Löhmus, A. (2011). Tree cavities in forests—the broad distribution pattern  
385 of a keystone structure for biodiversity. *Forest Ecology and Management*, 262(4),  
386 579-585.

387 **Roberge**, J. M., & Angelstam, P. (2006). Indicator species among resident forest birds—a  
388 cross- regional evaluation in northern Europe. *Biological Conservation*, 130(1),  
389 134-147.

390 **Roberge**, J. M., Mikusiński, G., & Svensson, S. (2008). The white-backed woodpecker:  
391 umbrella species for forest conservation planning?. *Biodiversity and conservation*,  
392 17(10), 2479-2494.

393 **Ruggera**, R. A., Schaaf, A. A., Vivanco, C. G., Politi, N., & Rivera, L. O. (2016).  
394 Exploring nest webs in more detail to improve forest management. *Forest Ecology*  
395 *and Management*, 372, 93- 100.

396 **Stokland**, J. N., Siitonen, J., & Jonsson, B. G. (2012). *Biodiversity in dead wood*.  
397 Cambridge, UK: Cambridge University Press.

398 **Storch**, D., Davies, R. G., Zajíček, S., Orme, C. D. L., Olson, V., Thomas, G. H., ... &  
399 Blackburn, T. M. (2006). Energy, range dynamics and global species richness  
400 patterns: reconciling mid-domain effects and environmental determinants of avian  
401 diversity. *Ecology Letters*, 9(12), 1308-1320.

402 **Tikkanen**, O. P., Martikainen, P., Hyvärinen, E., Junninen, K., & Kouki, J. (2006;  
403 ~~January~~). Red- listed boreal forest species of Finland: associations with forest  
404 structure, tree species, and decaying wood. In *Annales Zoologici Fennici* (pp. 373-  
405 383). Finnish Zoological and Botanical Publishing Board.

406 **Tylianakis**, J. M., Klein, A. M., Lozada, T., & Tschamtker, T. (2006). Spatial scale of  
407 observation affects  $\alpha$ ,  $\beta$  and  $\gamma$  diversity of cavity-nesting bees and wasps across a  
408 tropical land-use gradient. *Journal of Biogeography*, 33(7), 1295-1304.

409 **van** der Hoek, Y., Gaona, G. V., & Martin, K. (2017). The diversity, distribution and  
410 conservation status of the tree-cavity-nesting birds of the world. *Diversity and*  
411 *Distributions*, 23(10), 1120-1131.

412 **Virkkala**, R. (2006, ~~January~~). Why study woodpeckers? The significance of  
413 woodpeckers in forest ecosystems. In *Annales Zoologici Fennici* (pp. 82-85).  
414 Finnish Zoological and Botanical Publishing Board.

415 **Wesołowski**, T., & Martin, K. (2018). Tree holes and hole-nesting birds in European  
416 and North American Forests. In G. Mikusinski, J.-M. Roberge, & R. J. Fuller  
417 (Eds.), *Ecology and Conservation of Forest Birds* (Chapter 4, pp 79-134).  
418 Cambridge, UK: Cambridge University Press.

419 **Table 1. Results of generalized least square models of possible correlations**  
420 **between (1) excavator and non-excavator richness, (2) excavator and forest bird**  
421 **richness, (3) excavator and forest specialist richness.** Each result reflects the mean  
422 outcome of 1000 models build with 1000 randomly selected grid cell data points that  
423 include an exponential spatial covariance structure. The mean Spearman rho was  
424 calculated over the fit of each of 1000 models to a test data set.

| Zoogeographic region | Correlation | Mean Slope (Min. – Max.; SD) | % of models with $P < 0.05$ | Mean Spearman rho |
|----------------------|-------------|------------------------------|-----------------------------|-------------------|
| Nearctic             | 1           | 0.8 (0.4 - 1.3; 0.1)         | 60                          | 0.73              |
|                      | 2           | 4.3 (3.3 - 5.9; 0.4)         | 63                          | 0.84              |
|                      | 3           | 1.4 (1.2 - 1.6; 0.1)         | 71                          | 0.71              |
| Palearctic           | 1           | 1.1 (0.7 - 1.4; 0.1)         | 84                          | 0.78              |
|                      | 2           | 4.9 (4.0 - 6.7; 0.4)         | 73                          | 0.85              |
|                      | 3           | 1.1 (0.8 - 1.7; 0.1)         | 83                          | 0.79              |
| Oriental             | 1           | 0.7 (0.6 - 0.9; 0.0)         | 100                         | 0.88              |
|                      | 2           | 5.7 (4.9 - 6.6; 0.3)         | 100                         | 0.86              |
|                      | 3           | 1.6 (1.3 - 1.9; 0.1)         | 100                         | 0.77              |
| Neotropical          | 1           | 2.4 (1.9 - 3.0; 0.2)         | 83                          | 0.95              |
|                      | 2           | 10.8 (9.1 - 14.0; 0.7)       | 72                          | 0.97              |
|                      | 3           | 4.2 (3.4 - 5.2; 0.2)         | 72                          | 0.96              |
| Afrotropical         | 1           | 1.1 (0.7 - 1.9; 0.2)         | 76                          | 0.79              |
|                      | 2           | 6.8 (5.0 - 9.8; 0.9)         | 73                          | 0.94              |
|                      | 3           | 0.9 (0.6 - 1.5; 0.1)         | 79                          | 0.88              |
| Australasian         | 1           | 1.8 (1.4 - 2.2; 0.1)         | 88                          | -0.14             |
|                      | 2           | 7.5 (2.3 - 11.2; 1.3)        | 100                         | 0.31              |
|                      | 3           | 1.0 (-0.1 - 2.0; 0.3)        | 97                          | 0.69              |

425

426

427 **Table 2. Results of generalized least square models of possible correlations**  
428 **between (1) woodpecker and non-excavator richness, (2) woodpecker and forest**  
429 **bird richness, and (3) woodpecker and forest specialist richness.** Each result reflects  
430 the mean outcome of 1000 models build with 1000 randomly selected grid cell data  
431 points that include an exponential spatial covariance structure. The mean Spearman rho  
432 was calculated over the fit of each of 1000 models to a test data set.

| Zoogeographic region | Correlation | Mean Slope (Min. – Max.; SD) | % of models with $P < 0.05$ | Mean Spearman rho |
|----------------------|-------------|------------------------------|-----------------------------|-------------------|
| Nearctic             | 1           | 1.0 (0.5 - 1.6; 0.2)         | 61                          | 0.70              |
|                      | 2           | 5.3 (3.7 - 8.0; 0.7)         | 67                          | 0.79              |
|                      | 3           | 1.7 (1.1 - 2.2; 0.1)         | 70                          | 0.63              |
| Palearctic           | 1           | 1.2 (0.9 - 2.3; 0.1)         | 81                          | 0.79              |
|                      | 2           | 5.6 (4.3 - 8.1; 0.6)         | 73                          | 0.83              |
|                      | 3           | 1.3 (0.9 - 2.0; 0.2)         | 82                          | 0.73              |
| Oriental             | 1           | 1.0 (0.8 - 1.3; 0.1)         | 100                         | 0.88              |
|                      | 2           | 7.9 (6.6 - 9.8; 0.5)         | 100                         | 0.88              |
|                      | 3           | 2.2 (1.7 - 2.6; 0.1)         | 100                         | 0.80              |
| Neotropical          | 1           | 3.3 (2.4 - 4.9; 0.4)         | 68                          | 0.94              |
|                      | 2           | 14.3 (10.8 - 20.5; 1.6)      | 67                          | 0.93              |
|                      | 3           | 5.2 (3.9 - 6.6; 0.5)         | 73                          | 0.88              |
| Afrotropical         | 1           | 1.6 (0.9 - 3.5; 0.4)         | 72                          | 0.74              |
|                      | 2           | 9.9 (6.4 - 19.6; 1.9)        | 69                          | 0.86              |
|                      | 3           | 1.3 (0.7 - 3.2; 0.3)         | 80                          | 0.81              |
| Australasian         | 1           | 1.9 (-0.1 - 4.4; 0.6)        | 81                          | -0.33             |
|                      | 2           | 8.6 (1.2 - 21.8; 2.4)        | 75                          | -0.30             |
|                      | 3           | 3.9 (-0.2 - 9.0; 1.2)        | 96                          | -0.08             |

433

434 **Figure legends**

435 **Figure 1. Scatterplots indicating potential correlations between excavators and**

436 **non-excavators (a), excavators and all forest birds (b), and excavators and ~~all~~**

437 **forest specialist birds (c). Circular polygons represent the distribution of 95% of grid**

438 **cells pertaining to each of six zoogeographic regions. Points represent richness values in**

439 **10x10 km grid cells.**

440 **Figure 1.**

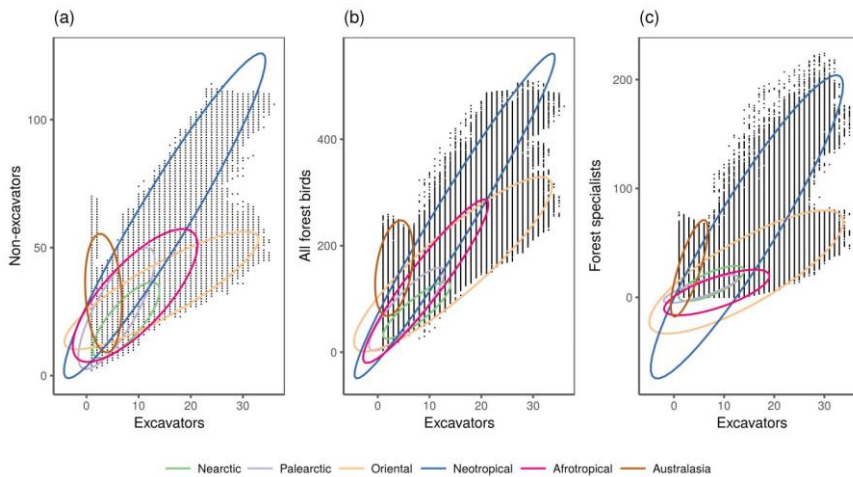

441

442

Commented [MOU50]: if something is 'circular', it cannot be a 'polygon'

443 **Figure 2. Scatter plots of the correlation between the richness (number of species)**  
444 **of excavators and all forest birds (upper row), all forest specialists (middle row),**  
445 **and all non- excavating cavity-nesters (bottom row) in six zoogeographic regions.**  
446 Points represent species richness values in 10x10 km grid cells, and the solid line  
447 represents the fit of a linear regression model, created using all grid cell values.

448

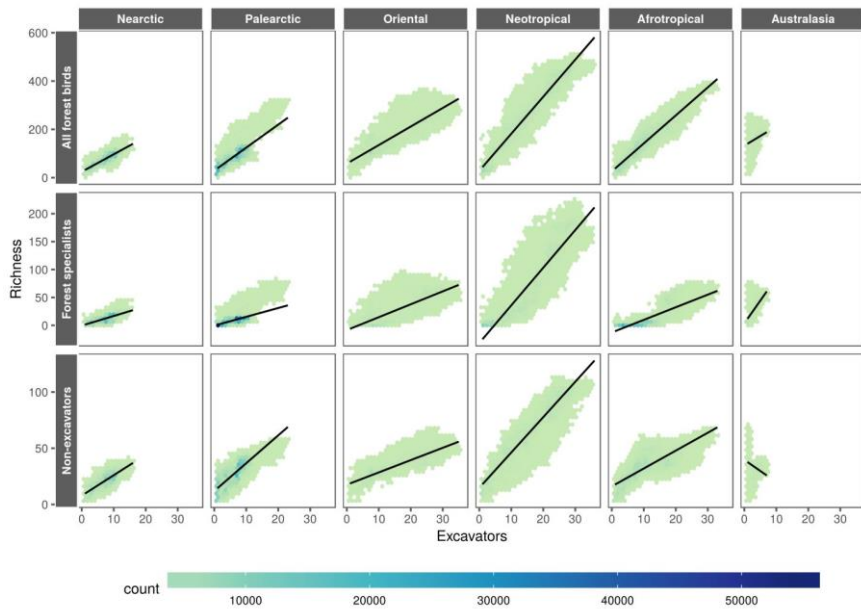

449 **Figure 2.**



## Appendix B

Authors Response letter to editor:

I am recommending a "reject/resub" decision because our "revision" turnaround time may be too short for the authors' needs in revising, and because the reviewers have raised extensive concerns, despite being encouraging overall about the manuscript.

They see issues with how the main problem of the study is set out, the methods, the evaluation, and the conclusions. They also note a geographic bias that may entail ecological biases in the relationships of excavators to their ecosystems.

If you elect to re-submit, please detail your responses to reviewers' comments and make clear how you have altered your re-submitted manuscript. Best wishes with your revisions.

Reviewers' Comments to Author:

Reviewer: 1

General comment:

The manuscript entitled "Global and universal relationships between tree-cavity excavators and forest bird richness." reports on an interesting exploratory study linking woodpeckers/other tree cavity excavators, secondary cavity users and other forest tree species at the global and bioregional levels. The results are useful and may inspire new studies exploring these relationships more in-depth.

**RESPONSE: We thank the reviewer for their supportive comments.**

My main criticism concerns the quality of reasoning and how and to what extent different issues are introduced and discussed. Proposing the use of certain group of species as indicators or other type of indicator species shall rest on solid grounds as well as need of such indicators should be clearly put forward. I simply miss the delineation of the conservation/management problem why we need indicators. There are many articles published on the worldwide decline of primary/intact forests, their characteristics and, in my opinion, you do not use the opportunity to discuss the potential role of woodpeckers/other tree cavity excavators (with very intimate linkages to natural forest characteristics) to support your case. Also, even if you mention their usefulness in management, there is lacking information on the intensively managed forests as areas that lose both important characteristics linked to old-growth forests and forests with high level of naturalness and thereby lose most specialized forest species often being woodpeckers.

**RESPONSE: We thank the reviewer for pointing out these ways to strengthen our text. We have added arguments and citations to strengthen these points throughout the Introduction (e.g., lines 96-98).**

Also use of woodpeckers/other excavators as indicators of successful forest restoration could be mentioned. There is large body of literature on both above topics and I suggest that you should add paragraphs pertaining on these issues in both Introduction and Discussion sections. To limit the length of the article, you may get rid of several unnecessary repetitions. More suggestions below:

Detailed comments:

Line 99: Several species use smaller trees or snags too. Possibly add "often" or "usually".

**RESPONSE: We agree with the reviewer that there are many exceptions, for which we followed the suggestion to add 'often' to soften the generalization.**

Line 109: Woodpeckers (cavity excavators) are most often resident species what could additionally strengthen your reasoning on strong linkages to forest environments and their quality.

**RESPONSE: We thank the reviewer for this valid point, and have incorporated a sentence to illustrate this in the second paragraph of our introduction.**

Lines 127-133: Please consult Wesolowski and Martin (2018) and extend the discussion on mechanism a bit more. I am lacking a clear statement on two possible, non-excluding each other mechanisms of expected relationships as very nicely stated way down in Discussion (Lines 312-314).

**RESPONSE: We thank the reviewer for this valid point. We agree that this is a key element of our manuscript that should be clarified much earlier in the text, and have a such included lines to address this topic in the very beginning of the Introduction.**

RESULTS: Could you add a summary table with numbers of species in different groups in different bioregions? It would provide some nice background for further discussions of results. You have those numbers already!

**RESPONSE: We understand that this might make it much easier to follow some of the reasoning, plus it would benefit authors who would like to build on our analyses. We have therefore followed your advice and added a supplementary table (Table S1) summarizing these data.**

Lines 224-231: I do not understand how you can model the relationship between woodpeckers and the three other groups in Australasia, where, as you state below, there is no woodpeckers or even other strong excavators are largely lacking.

**RESPONSE: Thank you for pointing this out, this is indeed a mistake. We have removed the 'woodpecker part' for Australasia and have added text to make this clear in methods as well ('We repeated all of these analyses for woodpeckers as a**

**subset of the excavators, with the notable exception of Australasia where woodpeckers are absent.')**

DISCUSSION: a bit confusing use of words “excavators/woodpeckers” (Line 244) and “excavators” (Line 275). Please check if necessary to use both of them!

**RESPONSE: We agree that this is a bit confusing and have simplified this, by simply using excavator/woodpecker when an argument or explanation concerns both groups equally and ‘excavator’ or ‘woodpecker’ by itself if it is particular to only one of these groups (e.g., when evidence does not extend beyond woodpeckers or when discussing specific results (e.g., ratios)).**

Lines 239-243: Worthy to mention that forests in some bioregions supply decay-formed cavities in high numbers (particularly non-managed forests) and some other not (e.g. boreal forest in Europe – see Andersson et al. (2018): Andersson J., Domingo Gomez E., Michon S., Roberge J.-M. (2018) Tree cavity densities and characteristics in managed and unmanaged Swedish boreal forest. *Scandinavian Journal of Forest Research*, 33 (3), pp. 233-244. It would add the management angle in discussion about the role of woodpeckers/excavators for other species.

**RESPONSE: We have added more text on this (esp. lines 304-309) including the reference suggested. We absolutely agree that this is a key element of the story, yet we aimed not to add too much to an already rather lengthy manuscript.**

Lines 272-273: Please refer to studies on the global species richness of woodpeckers e.g. Mikusinski, G. 2006. Woodpeckers (Picidae) - distribution, conservation and research in a global perspective. *Annales Zoologici Fennici* 43: 86–95.

**RESPONSE: We have added this reference.**

Lines 289-294: Refer also to the “primeval” Bialowieza Forest case in temperate zone being in stark contrast to managed forests (i.e. higher predation risk and subsequently preference for decay-formed cavities among secondary users. See: Wesolowski and Martin (2018) and references therein.

**RESPONSE: We have added a section on this, including additional references.**

Lines 299-304: Please refer to papers by Wesolowski here: Wesolowski T. 2011. "Lifespan" of woodpecker-made holes in a primeval temperate forest: A thirty year study. *Forest Ecology and Management*, 262 (9) , pp. 1846-1852.

**RESPONSE: We added this reference.**

Reviewer 2:

What is the difference between 'global' and 'universal'. There is nothing in the introduction, nor in the discussion, justifying the usage of these two words. I suggest to delete 'universal'

**RESPONSE: We thank the reviewer for this remark, it made it clear to us that we needed to clarify these terms. When we use the term 'global' we imply that these relationships can be found in nearly every region of the world, with 'universal' we mean that they are of similar nature (strong and positive).**

**We clarify these terms in both the Introduction and the Discussion (e.g., by adding that 'Around the world, we can find relationships of a universal nature (strong and positive) between excavator and forest bird richness.')**

I see this paragraph as mostly unnecessary, with some of this information that can be fused with the second paragraph

**RESPONSE: We understand that this start of the Introduction could be stronger, highlighting both the problem (need for indicators) and the opportunity (excavators/woodpeckers could make great indicators). We have reworked the introduction to accommodate these changes.**

**The reviewer mentions multiple inconsistencies in citations/references, we have now adopted the 'Open Biology/Royal Society Open Science' style and all issues should be resolved.**

I am not aware of this. I've seen some parrot species burrowing their own cavities in termitaria and cliffs, or 'arranging' cavities already done by woodpeckers or fungi. But I have not seen/heard about parrots excavating 'brand new' cavities in trees. Please, could you add a reference for that?

**RESPONSE: Although not common, parrots especially in Australasia may excavate in trunks that are in advanced stages of decay, without there having been a previous cavity, see e.g., Courtney, J. 2010. An Observation of Nesting Behaviour in Marshall's Fig-Parrot 'Cyclopsitta diophthalma marshalli'. Australian Field Ornithology, Vol. 27, No. 4, Dec 149-152.**

.....So, unless you have a better argumentation for this association at a global scale, I suggest to delete this part.

**RESPONSE: We have, in this new version, followed up on your suggestion and removed this statement that the response of woodpeckers can be indicative of that of forest birds in general.**

This is not what Cockle et al. (2011) found. According to the map in the Figure 2a, you can see that the pattern that you mention (excavated cavities as main source for non-excavator birds) is only strong in North America, very weak in Europe (only 1 out of 4 studies showed that pattern), and opposite in South America and Australia, this is, non-excavator birds mainly used decay formed cavities (there is no study in Africa). After Cockle et al. (2011), Ruggera et al. (2016) quoted "Therefore, in the PF woodpeckers do not seem to play a key role in provisioning cavities to the nest-web, a pattern also shown for other South American and some European forests, and contrary to the findings in North America (Cockle et al., 2011a,b; Pereira et al., 2009; Wesolowski, 2007)." Please, be careful when citing other authors, and put strictly what they have found.

**RESPONSE:** We agree that we may have overstated the importance of excavators for the provision of cavities, and have altered our language accordingly (e.g., stating that ‘cavity formation by excavation is an importance source of nest holes for species in many regions of the world’). However, Cockle et al. has shown that woodpeckers are an important provider of cavities in farmlands and altered forests in Argentina. Thus, even in South America, woodpeckers may provide a larger role in the provisioning of tree cavities than currently recognized.

- Please, see the previous comment on this pattern. Actually, it seems that woodpeckers play a considerably smaller role than that you stated, as cavity providers in many non-disturbed ecosystems. If my previous comment is correct, how is this prediction held?

**RESPONSE:** We think this new version of our manuscript does a better job at highlighting the two mechanisms by which excavators are indicators: due to their associations with particular forest elements and their role in facilitating the presence of other species through the provision of nest cavities. We therefore think this prediction is still valid, but we did alter the text to recognize this point:

**“Nevertheless, we might predict that these birds could be reliable indicators of avian diversity and richness not only at stand or landscape-levels (8, 17), but also across large regions at a global scale, not only for the cavities that excavators supply but also due to excavators’ associations with forest elements that are indicative of heterogeneous forests with a high degree of naturalness.”**

I see necessary to call to this group with something that recalls that are cavity users, because both forest specialist species and forest birds in general include also non-excavator bird species. An option can be ‘secondary cavity-nesters’

**RESPONSE:** We have followed this useful suggestion and have changed non-excavator to ‘secondary cavity-nester’ throughout the text.

Here or in Methods: it’s necessary to clarify if these categories are mutually exclusive. For example, some secondary cavity-nesters are forest specialists, and of course, are also forest birds in general. These species are considered in the three categories or only in the ‘non-excavator’ category? How this nested data set would eventually influence your results?

**RESPONSE:** We added a sentence in the Methods to explain that some of these numbers are indeed nested, with for example a forest specialist also being counted as a forest bird. We can see how it could be interesting to know (for example) details on the relationship between excavators and forest specialists that do not nest in cavities, which we do not provide at this point. One reason for this is that sample size for many grid cells would become too low for our models to converge, particularly when we would count forest specialists that do not breed in cavities as a separate group (e.g., there are relatively few forest specialists in the Nearctic that are not also cavity-nesters).

Another reason is that we aimed to know whether excavators make useful indicators and management surrogates. For this we wanted to know how indicative excavators are of larger and more inclusive suites of forest-associated birds, not of very specific subgroups (e.g., forest-associated species that do not breed in cavities and that do not exclusively use forest habitat).

What about the other two bird groups?

**RESPONSE: We have altered this text to make clear we predict that spatial variation in forest characteristics, management regimes, and bird communities will lead to differences in relationships between excavators and forest birds.**

- I suggest to deeply restructure the introduction: 1) a first paragraph that talks in general about the relationship of excavators with other birds (fusion of the first two paragraphs); 2) Exclusive paragraphs for each excavator relationship with each of the other 3 groups of birds. In each paragraph express what is known and what is the relationship predicted by the authors, and how they think that these relationships may vary in relation to the biogeographic regions considered. Another option is that the geographical variations of the relationships are expressed together in a separate paragraph. On the other hand, I think that it must necessarily be emphasized and made clear, what is the novelty provided by this study, in comparison with other studies cited in the same introduction and that address comparisons very similar to those of this study (eg Drever et al. 2008, Mikusinski et al 2001, Virkkala 2006).

**RESPONSE: We thank both Reviewer 1 and 2 for this suggestion for restructuring, and have adopted these suggestions. We have given more attention to the novelty of our study in the very first paragraph of our new version (Larger scale, testing for general patterns across all major biogeographic areas), and have further regrouped and organized the paragraphs in the introduction.**

- I find necessary to clearly define the categories of bird groups you use. I tried to do this by copy-and-paste some information you wrote below. However, I don't know if I did it correct, and the definition of 'excavator' group is missing. Please, check it and correct it. Yet, something is not clear to me, Can a given bird species be part of more than one group? If the answer is yes, how that influences on results?

**RESPONSE: We have added some text to clarify this in the methods and provided clear definitions of all bird groups used (see also our response to an earlier query above.**

- I find necessary to clarify some 'ecological' issues (i.e. not statistical) in methods. 1) Did you include the whole area of each biogeographic zone? or 2) only the forest areas in each one of them? If (1): How do you think the different amount of area/forest area of each biogeographic zone can influence your results? How non-forest excavators (as some woodpeckers) can influence your results? or did you exclude them? Another question: given the consideration of Palearctic and Oriental regions, what does the AUSTRALASIA region includes? what part of Asia?

**RESPONSE: We thank the reviewer for this question. We have added text to explain this in the Methods: "We did not restrict our analyses to forested regions, wanting to avoid making subjective decisions on the classification of a grid cell to a specific vegetation/habitat type. Yet, to make sure we did look for possible relationships between these forest-associated species in regions they actually occur, we did remove cells with zero excavators/woodpeckers and cells where the numbers of secondary cavity-nesters, forest specialists, or all forest birds were lower than that of excavators/woodpeckers from further analyses. "**

**That said, we are not sure how the amount of area/forest area would influence our results, but we have aimed to circumvent that issue as much as possible by randomly selecting (1000 times) 1000 grid**

cells per region, thereby comparing similar surface (though not necessarily forest, but see above) areas per region.

Australasia encompasses the following regions, following our adaptation of the classification of van der Hoek et al. 2017. Diversity and Distributions, which is in turn based on that of the Handbook of the Birds of the World (Del Hoyo et al.): American Samoa, Australia, Bismarck Archipelago, Admiralty Islands, Cook Islands, Easter Island, Federated States Micronesia, Fiji, French Polynesia, Guam and the Marianas, Johnston Island, Kiribati, Macquarie Island, Marshall Islands, Nauru, New Caledonia, New Guinea, New Zealand, Niue, Norfolk Island, Papua New Guinea, Pitcairn Islands, Samoa, Solomon Archipelago, Tokelau, Tonga, Tuvalu, Vanuatu, Wake Island, Wallis and Futuna. Practically, we can say that most excavators in this region are from (Papua) New Guinea and surrounding islands.

- What did you specifically model? which were the variables?

**RESPONSE: The gls models are more clearly explained now: “ This implied the use of gls models with excavator richness as a predictor variable, the richness of one of the categories of forest-associated birds as a response variable, and a variable exponential spatial covariance structure...”**

- I am not an specialist in this kind of analyses, and I could not fully understand it. Given that many readers of this kind of papers are not specialists either, I find very important to better explain this methodological part. What are the predicted and what the observed data? What does tell us the regression slopes and what the mean spearman rho? Nevertheless, at this point, I have the impression that you modeled the richness of non-excavators and forest birds, relative the presence of excavators (explanatory variable), i.e. in a causal manner (= gls models). However, in the introduction this relationship was mostly raised in a correlational manner, this is, that both excavators and the other forest bird groups show similar responses to forest structure and disturbances. Exceptions to this correlational relationship are, for example, the FEW cases (in terms of global areas) in which excavators are essential for nonexcavators by providing new cavities or food resources (sap and insects in excavator perforations). In short, you are analysing a relationship that you mostly posted as correlational, with regression models. Please, if my reasoning is incorrect, just ignore it, but explain better the methodology.

**RESPONSE: We have added some clarification (see e.g., the answer above) that may help understand these methods better.**

That said, it is correct that a gls model is basically an ordinary linear regression model with some different assumptions (or some assumptions not met; in this case related to spatial autocorrelation). However, whereas the reasoning behind a correlation vs. a regression differ, the statistics are, in this particular case, the same. A correlation can indeed encompass any relationship between two variables, without assuming cause and effect, whereas a linear regression can only be that: a linear relationship where we assume that X predicts Y. When the correlation is linear though, this becomes one and the same in terms of output (though not interpretation, which we therefore have been careful with, see our Discussion). In other words, when in this particular case both tests address the ‘null hypothesis that the two variables are not linearly related. If run on the same data, a correlation

test and slope test provide the same test statistic and p-value.' (see e.g., <http://sites.utexas.edu/sos/guided/inferential/numeric/bivariate/cor/>).

So why then this regression and not a correlation, if they provide the same outcome but correlations are easier to interpret? Largely because we would be unable to incorporate a measure to address spatial autocorrelation into a correlation test.

- given that in Fig. 1 you detailed ellipses for each of the six zoogeographic region. I'd say that you can leave only the figure 2 and nothing would be lost

**RESPONSE: We have followed this suggestion and removed the first of the two figures, leaving only the multi-paneled one. That said, we opted to add one map that shows global distributions of excavators relative to secondary cavity-nesters, a map which we deem to be illustrative of the spatial variation and clustering (e.g., between zoogeographic regions) that we discuss in our manuscript.**

- It seems like sometimes your reasoning is associative/correlative (e.g. both excavators and other groups of forest birds have similar responses to disturbances), other times it is explanatory (e.g. the excavator richness determines the richness of other non excavator cavity-users by providing new cavities), and here it is predictive: the addition of 1 excavator species implies the addition of X forest bird species, ignoring any other type of causes, such as phylogenetic, biogeographical, etc. You must decide which of these visions you are going to explore, or clearly establish that all of them will be analysed, with their respective methodologies and theoretical support.

**RESPONSE: Although regressions provide both explanatory and predictive outcomes we understand that our language here is confusing, and our statements may be misinterpreted as meaning one can simply predict from a given number of excavators how many other forest birds there are at that location (which is, of course, not that simple as you rightly point out). Yet, whether the tested relationships are associative (similar habitat needs etc.) or causative (birds use the cavities created by excavators), the fact of the matter is that they are linear. But, in some regions, this relationship is stronger than in others. We should have focused on this and not the steepness of the slopes; and we have therefore removed these parts from the Results and Discussion sections.**

**That said, we explore whether there are relationships between excavators and other forest birds (the GLS models themselves), but also aimed to see if this could then be used to determine to what extent excavator richness is indicative of that of other species (the matching with the test data set and derivation of Spearman rho's). We hope that this approach is clearer from our revised manuscript.**

- Commented [MOU25]: What exactly does the Rho (=strength) mean in this context? low values of Rho mean that the relationships are not very reliable? for example in australasian region. And more important, what would be the joint interpretation of the slopes, the percentage of models with p greater than 0.5 and the rho?

**RESPONSE: Rho would here give us an idea how 'perfect' the linear relationships are (with rho = 1 being perfect with all grid cells falling on one line), whereas the slope (which we now removed from further discussion (see above) but present in the Results section to be complete in our presentation of model statistics) would tell us how many other forest birds (other than excavators) there are likely to be in a given location (grid cell) relative to the number of excavators (this does thus present an idea of**



**‘what richness’ a certain number of excavators would possibly indicate). The % of models with a  $p < 0.05$  gives us an idea whether these relationships are significant or not, given we had to iterate over many (1000) models, this would be a measure of reliability of the relationships given the combination of both the correlation coefficient and the sample size (which here is always 1000).**

**Low values of rho do not necessarily mean that that the relationships are not very reliable, but rather that they would not be strong enough to be able to ‘use richness of excavators’ to predict how many other forest birds are in a given location (here grid cell). Thus low values of rho would, in this case, show that excavators are rather poor indicators of other forest birds, even though the relationships might be real and significant.**

- Commented [MOU27]: I would like to read what are those differences to take into account from a practical point of view and Commented [MOU28]: The comment on nest-webs here, in the first paragraph of Discussion, is out of context. Besides, variation among nestwebs... in relation to what? Are you trying to relate the association of excavators and other forest birds with variations in nestweb characteristics? it's far from clear, and you are leaving out a key aspect: the diversity, persistence and characteristics of trees with cavities

**RESPONSE: We have made some substantial changes to our text and hope to now provide a clearer line of argumentation.**

- However, in several other nestwebs (for example in South America [Cockle et al. 2012, Ruggera et al. 2016] and India [Manikandan & Balasubramanian 2018]), most non excavator birds mainly use decay-formed cavities in living trees. Only 10-25% of interactions (including excavator interactions) are made with snags. So, the evidence to date (even in the Neotropics, where your results showed the strongest association between excavators and non-excavators), would not be explained by the number of snags or the amount of woodpecker-excavated cavities. Also, you need to better explain why forest specialist birds would benefit from the presence of ‘certain levels (how much?) of availability of decaying and dead wood’

**RESPONSE: We have made substantial changes to the text in the Discussion, incorporating suggestions by both reviewers, which means that we now provide a clearer insight in the differences in the importance of decay vs. excavated cavities in the different regions. With that, we anticipate to have resolved these issues as well.**

- differences in relation to what of the nestwebs? you need to be more specific. You need to better explain this: how speciation and other macro-scale processes across the globe influence on the results you found. Explanations generally are biased to nestwebs. However, you have other bird groups that not necessarily are cavity-nesters. Also, you don't necessarily have to invoke networks (of which there are relatively few reports worldwide) to talk about cavity-nesters (of which there are comparatively many more reports around the world)

**RESPONSE: We thank the reviewer for this comment. We have made substantial changes to our text, reflecting better that both direct facilitation through nest-webs and indirect associations play a role in shaping the observed relationships. As a result of these changes, we have also paid more attention to the role of differences in community composition etc. in shaping these relationships.**

- Australasia region doesn't lack Piciformes. As you say a few words later, SE Asia has a high diversity of Piciformes. So, be careful when you explain Australasia results as a unique region (see comment also about AUSTRALASIA in methods). In fact, I would like to find a better explanation of the results of the Australasian region, since it had the most contrasting results with the rest of the regions.

**RESPONSE: There is a difference between the Oriental and Australasian zoogeographic regions that may have gone unnoticed to the reviewer. Most of Indonesia and other SE Asian countries falls within the Oriental region, with the Wallace line separating this region from the Australasian region (e.g., Papua/New Guinea) where some excavators exist but Piciformes are notably absent (see also e.g., Mikusiński, G. (2006, January). Woodpeckers: distribution, conservation, and research in a global perspective. In *Annales Zoologici Fennici* (pp. 86-95). Finnish Zoological and Botanical Publishing Board.). That said, we do agree that the results we found for the Australasian region deserved more attention, and have thus extended on this in the text.**

- what differences? you have not established what are the differences along the neotropical region in terms of climatic variables, tree species composition, tree availability and their formation agents. Also, include in this comparison the work by Ruggera et al. 2016, how their results fit in the explanation your trying to develop?

**RESPONSE: In our revised version you will find references to Ruggera et al. as well as more comprehensive explanation of the differences found across and within regions.**

- then, if non-excavators do not 'need' excavators as cavity-forming agents, why did they show the greatest association in richness in the Neotropics?

**RESPONSE: We anticipate that we have now explained this better, focusing on the fact that indirect associations (shared forest elements etc.) are more important than direct facilitation (cavities) in explaining these relationships.**

- Commented [MOU40]: Altamirano et al. 2017 wrote: 'Among SCNs, ten species (40%) were obligate and 15 (60%) were non obligate cavity nesters. Non obligate cavity nesters included six (24%) facultative, five (20%) marginal, and four (16%) incidental SCN'. If we include also PCN, facultative cavity nesters are 20%. Commented [MOU41]: how are they influenced? Again, I lost the point. You began talking about 'spatial variation in the relationships between excavators and other forest birds within zoogeographic regions', but then you focused (again) only on excavators and non-excavators, especially in the Neotropics.

**RESPONSE: We have changed these parts of text substantially, hopefully addressing these issues and providing more clarity.**

- I believe that this is a central point, that it should be better developed in the introduction, and that the methodology should be chosen according to that. It is not the same to analyze something in a correlative way, that in an explanatory or predictive way

**RESPONSE: Yes, we agree. We have made an effort to provide more attention to these two different mechanisms (direct facilitation and indirect association) by which relationships between excavators and other forest birds may be formed.**

**Appendix C****ROYAL SOCIETY  
OPEN SCIENCE****Global and universal relationships between tree-cavity  
excavators and forest bird richness**

|                               |                                                                                                                                                                                                                                                                        |
|-------------------------------|------------------------------------------------------------------------------------------------------------------------------------------------------------------------------------------------------------------------------------------------------------------------|
| Journal:                      | <i>Royal Society Open Science</i>                                                                                                                                                                                                                                      |
| Manuscript ID                 | RSOS-192177                                                                                                                                                                                                                                                            |
| Article Type:                 | Research                                                                                                                                                                                                                                                               |
| Date Submitted by the Author: | 13-Dec-2019                                                                                                                                                                                                                                                            |
| Complete List of Authors:     | van der Hoek, Yntze; The Dian Fossey Gorilla Fund International, Karisoke Research Center<br>Gaona, Gabriel; Justus Liebig Universität Giessen Graduiertenzentrum Ciach, Michal; University of Agriculture in Krakow<br>Martin, Kathy; University of British Columbia, |
| Subject:                      | ecology < BIOLOGY                                                                                                                                                                                                                                                      |
| Keywords:                     | Facilitator species, Indicator species, Species interactions, Picidae, Management surrogates, Woodpeckers                                                                                                                                                              |
| Subject Category:             | Biology (whole organism)                                                                                                                                                                                                                                               |
|                               |                                                                                                                                                                                                                                                                        |

SCHOLARONE™  
Manuscripts

**Author-supplied statements**

Relevant information will appear here if provided.

**Ethics**

*Does your article include research that required ethical approval or permits?:*

This article does not present research with ethical considerations

*Statement (if applicable):*

CUST\_IF\_YES\_ETHICS :No data available.

**Data**

*It is a condition of publication that data, code and materials supporting your paper are made publicly available. Does your paper present new data?:*

Yes

*Statement (if applicable):*

Links to the data and R scripts to reproduce analyses presented in Global and universal relationships between tree-cavity excavators and forest bird richness can be found in Appendix S1.

**Conflict of interest**

I/We declare we have no competing interests

*Statement (if applicable):*

CUST\_STATE\_CONFLICT :No data available.

**Authors' contributions**

This paper has multiple authors and our individual contributions were as below

*Statement (if applicable):*

YH and GVG carried out the data analysis, and led the design of the study and writing of the manuscript; MC and KM critically revised the manuscript. All authors contribute to the writing of the final manuscript, gave final approval for publication and agree to be held accountable for the work performed therein.

1  
2  
3 1 Title: Global and  relationships between tree-cavity excavators and forest bird richness

4 2  
5 3 Running title: Excavator and forest bird relationships

6 4  
7 5 Yntze van der Hoek<sup>1,2\*</sup>, Gabriel V. Gaona<sup>1</sup>, Michał Ciach<sup>3</sup> and Kathy Martin<sup>4,5</sup>

8 6  
9 7 <sup>1</sup> Universidad Regional Amazónica Ikiam, Vía Muyuna, Kilómetro 7, Tena, Ecuador.

10 8 <sup>2</sup> The Dian Fossey Gorilla Fund International, Musanze, Rwanda.

11 9 <sup>3</sup> Department of Forest Biodiversity, Institute of Forest Ecology and Silviculture, Faculty of  
12 10 Forestry, University of Agriculture, al. 29 Listopada 46, 31-425 Kraków, Poland.

13 11 <sup>4</sup> Department of Forest and Conservation Sciences, University of British Columbia, 2424 Main  
14 12 Mall, Vancouver, British Columbia V6T 1Z4 Canada.

15 13 <sup>5</sup> Environment and Climate Change Canada, 5421 Robertson Road, R.R. 1, Delta, British  
16 14 Columbia V4K 3N2, Canada.

17 15  
18 16 \*Corresponding author: [yntzevanderhoek@gmail.com](mailto:yntzevanderhoek@gmail.com)  
19 17  
20 18  
21 19  
22 20  
23 21  
24 22  
25 23  
26 24  
27 25  
28 26  
29 27  
30 28  
31 29  
32 30  
33 31  
34 32  
35 33  
36 34  
37 35  
38 36  
39 37  
40 38  
41 39  
42 40  
43 41  
44 42  
45 43  
46 44  
47 45  
48 46  
49 47  
50 48  
51 49  
52 50  
53 51  
54 52  
55 53  
56 54  
57 55  
58 56  
59 57  
60 58

**Abstract**

Global monitoring of biodiversity and ecosystem change can be aided by the effective use of indicators. Tree-cavity excavators, the majority of which are woodpeckers (Picidae), are known to be useful indicators of the health or naturalness of forest ecosystems and by the diversity of forest birds. They are indicators of the latter due to their associations with particular forest elements and because of their role in facilitating other species through the provision of nest cavities. Here, we investigated whether these positive correlations between excavators and other forest birds are also found at global scales. We used global distribution maps to extract richness estimates of tree-cavity nesting and forest-associated birds, which we grouped by zoogeographic regions. We then created generalized least squares (gls) models to assess the relationships between these groups of birds. We show that richness of tree-cavity excavating birds correlates positively with that of cavity-nesters and forest birds at global scales, but with variation across zoogeographic regions. As many excavators are relatively easy to detect, play keystone roles at local scales, and are effective management targets, we propose that excavators are useful for biodiversity monitoring across multiple spatial scales and geographic regions, especially in the tropics.

**Keywords**

Facilitator species, Indicator species, Management surrogates, Picidae, Species interactions, Woodpeckers

## 93 Introduction

94 Forests worldwide are facing increasing anthropogenic pressures, with both a rapid decline in the  
95 surface area of natural forests and a decrease in the naturalness of forests as a result [1, 2]. In  
96 turn, these reductions of high-quality forest habitats have led to a loss of forest-associated  
97 biodiversity [3-5]. To monitor these changes in forest ecosystems and their denizens, we often  
98 look at specialized animals that require the availability of specific habitat structures and  
99 processes across long temporal and large spatial scales [6], such as birds that respond not only to  
100 a loss in overall forest cover but also to a change in forest health, quality, and integrity [7-10].  
101 Excavators such as woodpeckers, barbets, nuthatches, trogons and certain parrot species—among  
102 which woodpeckers are the most numerous group [11]—may be especially effective indicators  
103 due to their associations with particular forest elements and their role in facilitating the presence  
104 of other species through the provision of nest cavities. Indeed, there is empirical evidence that  
105 their presence can be indicative of the state of both the forest (e.g., the presence of large trees  
106 [12], heterogeneous forest structure [13], or a high level of naturalness [14-18]) as well as the  
107 richness and abundance of other forest-associated species [19-21]. However, we may question  
108 whether excavators are universally effective indicators, at least of biodiversity, in all geographic  
109 regions or forest types. For example, excavators are better predictors of richness and abundance  
110 of other forest resident birds in deciduous versus coniferous forests of certain parts of hemiboreal  
111 Europe [15].

112 If relationships between excavators and other forest-associated biota are universally  
113 positive in nature, and common not only at stand- and landscape-scales but hold across large  
114 geographic regions, then excavators could form a unique group of indicators that may be  
115 effective across multiple locations and spatial scales [22]. To find species that are effective as  
116 both indicator and management surrogates across multiple regions would be especially useful in  
117 the largely understudied tropics where comprehensive biodiversity assessments are costly and  
118 logistically challenging [23]. The first signs are promising as the overwhelming majority of tree-  
119 cavity excavators are forest or woodland birds and general patterns of woodpecker richness  
120 correlate positively with the amount of forest cover at the global scale [24]. Moreover, many  
121 excavators are regarded as habitat specialists and tend to have highly specific habitat  
122 requirements, ~~requirements~~ which are usually only met in forests with high degrees of  
123 naturalness and low levels of disturbances (e.g., logging). In fact, restoration efforts have  
124 effectively made use of woodpeckers to indicate that restoration has successfully reached a  
125 certain level of naturalness [25, 26]. This group of birds often utilizes large, live or decaying  
126 trees, or coarse woody debris, for nesting, roosting, and feeding, and the availability of dead  
127 wood is in particular found to be important [27-29]. This role of excavators as indicators of the  
128 naturalness of ecosystems, whereby their presence correlates strongly with other aspects of  
129 biodiversity, is enhanced by the fact that the majority of species are forest residents, which  
130 arguably makes them more responsive to local changes in habitat quality (see e.g., [30]).

131 Excavators are not only reliable indicators of other forest birds by means of their mutual  
132 associations with forest characteristics, but correlations between both groups of birds are also  
133 partially determined by species interactions. Taken together, these ‘nest-webs’ [31] of interacting  
134 species are structured by the availability and acquisition of tree-cavities formed by two major  
135 processes: ‘~~natural~~ formation’, in which fungi decompose wood over an extended period, or  
136 animal excavation [32, 33]. Since most excavators—at least the majority of woodpeckers—  
137 excavate a new nest cavity each year, this mode of cavity creation steadily provides a large  
138 number of potential sheltered roosting and nesting sites for secondary-users: both for vertebrates

1  
2  
3 139 [33] and invertebrates [34, 35]. As a result, cavity formation by excavation is an important  
4 140 source of nest holes for species in many regions of the world, especially North America [33].  
5 141 However, decay-formed cavities are likely to be more important nest sites in other regions,  
6 142 especially the tropics, and it is very likely that the relative importance of both processes of cavity  
7 143 formation—and thus the strength of the relationship between excavator richness and secondary  
8 144 cavity-nester richness—varies globally [33]. Finally, it is worth noting that excavators play  
9 145 additional roles (beyond the direct provision of cavities) that may facilitate other species. For  
10 146 example, as excavators perforate the bark of trees they may expose insects or sap for other  
11 147 species to forage on [36, 37]. In addition, excavators can aid in the dispersal of fungi, which in  
12 148 turn enhances processes of wood softening and the formation of decay-formed cavities [38].

13 149 **Local studies of cavity-nesting birds and their interactions are largely biased towards**  
14 150 **temperate zones, and only a few authors have explored global variation in nest-web**  
15 151 **characteristics or addressed how such variation should be taken into account when considering**  
16 152 **cavity-nester communities in forest conservation or management (e.g., [33, 39]).** Nevertheless,  
17 153 we might predict that these birds could be reliable indicators of avian diversity and richness not  
18 154 only at stand or landscape-levels [9, 19], but also across large regions at a global scale, if not for  
19 155 the cavities that excavators supply but for the associations of excavators with forest elements that  
20 156 are indicative of heterogeneous forests with a high degree of naturalness. Therefore, the aim of  
21 157 the present study is to investigate whether there are consistent patterns in the relationships  
22 158 between avian tree-cavity excavators (hereafter: excavators) and species richness of non-  
23 159 excavating tree-cavity nesters (hereafter: secondary cavity-nesters), forest specialist species, and  
24 160 forest birds in general, across the globe. If previously observed relationships between cavity-  
25 161 excavators and other forest birds scale up from local forest stands [17] or ecosystems [19] to  
26 162 zoogeographic or global levels, then this strengthens the potential of tree cavity-excavators as  
27 163 both indicators and management surrogates.

28 164 Given the important role of excavators in forest ecosystems, we predicted that secondary  
29 165 cavity-nester, forest specialist, and forest bird richness generally will increase with the number of  
30 166 excavators present in the ecosystem, regardless of the ecosystem or location. However, we also  
31 167 predicted that the nature (e.g., the strength and slope of correlations) of the relationships between  
32 168 excavators and richness of other forest birds will vary across zoogeographic regions, reflecting  
33 169 differences in forest characteristics (e.g., deciduous vs. coniferous forests), forest management  
34 170 practices (e.g., forests being more or less intensively managed), and bird communities (e.g., the  
35 171 relative richness of different groups of forest-associated birds), as previously discussed in e.g.,  
36 172 [33]. In particular, we predicted that correlations between excavators and other birds would be  
37 173 particularly strong, but with relatively shallow regression slopes, in regions with relatively high  
38 174 intensities of forest management (vs. unmanaged natural forests) and low overall diversity. In  
39 175 these predominantly temperate and boreal regions, such as the Nearctic and Palearctic,  
40 176 relationships between excavators and other forest birds that are driven by mutual associations  
41 177 with particular forest elements would be enhanced by direct interactions through the provision of  
42 178 nest cavities, as a lack of available decay-formed cavities may increase the dependence of  
43 179 secondary-cavity nesters on excavated cavities. We predicted relatively shallow regression  
44 180 slopes in these regions (Nearctic, Palearctic), as there is a relatively low ratio between the  
45 181 numbers of excavators and secondary-cavity nesters [11]. For regions that largely span the  
46 182 tropics, such as the Neotropics, we also predicted positive correlations between excavators and  
47 183 other forest birds, but as these relationships would be driven mainly by mutual associations with  
48 184 particular forest elements and less by direct interactions through the provision of nest cavities—



1  
2  
3 185 decay-formed cavities being more prevalent here—we predicted these correlations to be weaker.  
4 186 However, as these regions are more diverse, we also predicted that there would be relatively  
5 187 higher numbers of forest birds per excavator, resulting in steeper regression slopes. 

## 188 189 **Material and Methods**

9 190 We used published global distribution maps of tree-cavity nesting birds [11] and forest birds [40]  
10 191 to extract richness estimates per 10×10 km grid cell. Maps for both tree-cavity nesters and forest  
11 192 birds were based on the same species range maps provided by BirdLife International and  
12 193 NatureServe [41]. We selected and classified focal bird species following [11, 40] as 1)  
13 194 excavators (species that are known to often or always excavate their own nesting cavities),  
14 195  secondary cavity-nesters: birds which are known to nest in tree cavity but which never or rarely  
15 196 excavate their own cavity, 3) forest specialists: birds that exclusively use forest habitat, and 4)  
16 197 forest birds: birds that use forest habitat but also at least one other type of habitat. We note that  
17 198 some species were counted in more than one  gory (e.g., a species that is a ‘forest specialist’  
18 199 is per definition also counted as a ‘forest bird’). However, excavators were never counted in any  
19 200 other category.

20 201 We used only range polygons where a species’ presence was classified as ‘Extant’ or  
21 202 ‘Probably extant’, and assigned ‘presence’ to all grid cells that overlapped with range polygons.  
22 203 Next, we created generalized least squares (gls) models to assess the linear relationships between  
23 204 excavators and other categories of forest-associated birds. To take biogeographical differences  
24 205 into account, we proceeded to separate trends across the globe, and created gls models for the six  
25 206 zoogeographic regions separately: Nearctic, Palearctic, Neotropical, Afrotropical, Oriental, and  
26 207 Australasia. We did not restrict our analyses to forested regions, wanting to avoid making  
27 208 subjective decisions on the classification of a grid cell to a specific vegetation/habitat type. Yet,  
28 209 to make sure we did look for possible relationships between these forest-associated species in  
29 210 regions they actually occur, we removed cells with zero excavators/~~woodpeckers~~ and cells where  
30 211 the numbers of secondary cavity-nesters, forest specialists, or all forest birds were lower than  
31 212 that of excavators/~~woodpeckers~~ from further analyses.

32 213 Our data were spatially structured (i.e., high and low richness of birds in different  
33 214 categories (excavators etc.) was spatially clustered) across and within zoogeographic regions, as  
34 215 demonstrated by the global distribution of the relative number of cavity excavators to non-  
35 216 excavating cavity-nesting birds (expressed as the ratio of excavator / non-excavating cavity-  
36 217 nester; Fig. 1). Thus, we followed similar protocols to adjust for spatial autocorrelation as per  
37 218 Storch et al. [42]. This implied the use of gls models with excavator richness as a predictor  
38 219 variable, the richness of one of the categories of forest-associated birds as a response variable,  
39 220 and a variable exponential spatial covariance structure, as these models had the best fit in  
40 221 preliminary tests, which reduced—rather than eliminated—the influence of spatial  
41 222 autocorrelation on our models. In these tests, exponential gls models consistently had the lowest  
42 223 Akaike’s Information Criterion (AIC) value compared to a set of models, including an ordinary  
43 224 least squares model with no spatial structure, and gls models with Gaussian, linear, rational  
44 225 quadratics and spherical spatial covariance structures.

45 226 Even though gls models work well with large datasets, we found that gls models fitted on  
46 227 all data failed to converge (using the R package “nlme” [43]). To circumvent this computational  
47 228 problem, we first grouped grid cells by zoogeographic region. We thereafter ran 1000 models on  
48 229 bootstrap permutations of 1000 randomly selected grid cells (see [24, 44]). Of these 1000 model  
49 230 iterations, we subsequently calculated the mean ( $\pm$ SD), minimum and maximum coefficients of

231 the regression slope. As gls models do not provide a measure of the strength of relationships, we  
232 proceeded with a different measure of the strength of each correlation: fitting each exponential  
233 gls model to a different, non-overlapping, test data set of 1000 randomly selected grid cells. We  
234 then proceeded to calculate the Spearman rho coefficient of the correlation between predicted  
235 and observed data, for all 1000 models per zoogeographic region. Finally, we calculated the  
236 mean Spearman rho of all significant models per zoogeographic region. We repeated all of these  
237 analyses for woodpeckers as a subset of the excavators, with the notable exception of Australasia  
238 where woodpeckers are absent. All data, R scripts, and initial results needed to reproduce our  
239 analyses presented here are deposited online (Appendix S1).

## 240 241 **Results**

242 Using gls modelling to assess the global patterns for the relationships between excavator richness  
243 and that of secondary cavity-nesters, forest specialists, and all forest birds, we found positive  
244 relationships between all pairs of comparisons. However, these relationships differed in relative  
245 strength and regression slope depending on the group of birds and zoogeographic region  
246 analysed (Fig. 2, Table 1; see Table S1 for an overview of the number of species per group per  
247 region).

248 In terms of variation across zoogeographic regions, the relationships between excavators  
249 and all other groups of forest-associated birds were typified by particularly steep regression  
250 slopes in the Neotropics, where the presence of one additional excavator species in a grid cell  
251 implied an increase of more than two additional secondary cavity-nesters, ten forest bird species,  
252 or four forest specialists. In contrast, regression slopes were less steep in predominantly  
253 temperate and boreal regions such as the Nearctic and Palearctic, where an increase of one  
254 excavator species signified an increase of approximately one secondary cavity-nester species,  
255 four to five forest birds, or one forest specialist. More importantly, and similar to variation in the  
256 slopes of the regressions, we found differences in the strength (as represented by Spearman's  
257 rho) of these relationships, with again stronger relationships in the predominantly tropical  
258 Afrotropical, Oriental, and Neotropical regions than in the comparably more temperate/boreal  
259 Nearctic and Palearctic regions (Table 1).

260 Although the relationships between excavators and the other three groups of cavity-  
261 nesting and forest-associated birds were generally similar in nature (positive), there were some  
262 differences in the relative strength of these relationships across zoogeographic regions. For  
263 example, excavator richness was a particularly strong predictor of secondary cavity-nester  
264 richness and of all forest birds in the Oriental region ( $\rho = 0.88$  and  $0.86$ , respectively), and  
265 slightly less so for forest specialists ( $\rho = 0.77$ ), whereas excavator richness in the Afrotropics  
266 showed a strong relationship with all forest birds ( $\rho = 0.94$ ) and with forest specialists ( $\rho =$   
267  $0.88$ ), but a somewhat weaker association with secondary cavity-nesters ( $\rho = 0.79$ ).

268 We repeated all analyses for woodpeckers as a subset of excavators and found nearly  
269 identical results, with again significant positive relationships between woodpeckers and other  
270 groups of cavity-nesting or forest-associated birds in all regions except Australasia, and with steeper  
271 regression slopes and stronger relationships in the predominantly tropical Neotropical, Oriental  
272 and Afrotropical regions as compared to more shallow slopes and weaker associations in the  
273 Nearctic and Palearctic (Table 2). The relative strength of the relationships between  
274 woodpeckers and the three other groups of cavity-nesting and forest-associated birds again  
275 depended on the zoogeographic region (in similar ways as for entire group of excavators) such  
276 that woodpeckers were strong predictors of the richness of other birds as excavators in general,

1  
2  
3 277 with the notable exception of Australasia. Nevertheless, despite the complete absence of  
4 278 woodpeckers from this region, we did find a  $\sqrt{k}$  ( $\rho = 0.69$ ) but often significant ( $p < 0.05$  in  
5 279 97 percent of model iterations) positive relationship between richness of excavators and forest  
6 280 specialists.

## 281 282 Discussion

283 We found strong positive relationships between excavators/~~woodpeckers~~ and secondary cavity-  
284 nesters, forest birds and forest specialists at global and zoogeographic scales, although these  
285 relationships differed in both strength and characteristics (regression slopes) across  
286 zoogeographic regions. Our results imply that excavators and woodpeckers (a predominant  
287 subset of excavators) hold potential as indicators and management surrogates across most of the  
288 world, but also that we need to take differences among zoogeographic regions (e.g., in the  
289 composition of local and regional nest-webs with regards to the relative numbers of excavators  
290 and secondary cavity-nesters as seen in Fig. 1) into account if we are to adopt these as surrogates  
291 for conservation or management.

292 Many excavators, ~~woodpeckers included~~, have strong preferences for specific forest  
293 elements, such as dead and decaying trees or particularly large trees (see e.g., [28]). In turn, these  
294 elements, and the processes that drive their presence and abundance, are of great importance to  
295 habitat formation and create additional niche space to support many groups of organisms [46].  
296 Therefore, we can expect that forests that meet the habitat requirements of excavators (e.g.,  
297 certain levels of availability of decaying and dead wood) provide high-quality habitat for many  
298 other wildlife species. ~~This may explain the higher richness of forest birds in areas occupied by~~  
299 ~~high numbers of excavators/woodpeckers~~. For non-excavating species that utilize tree-cavities  
300 for their nests, this relationship may be ~~enhanced~~ by the fact that excavators/woodpeckers create  
301 or facilitate potential nest substrates. In other words, the strong habitat preferences of many  
302 excavators/~~woodpeckers~~, as well as the facilitatory role excavators play in providing nest  
303 substrates, make these birds potentially effective indicators of many forest-associated species  
304 and, by extension, of high-quality forests (i.e., natural, old-growth; [17, 18]).

305 The steep slopes we found for correlations between excavators/~~woodpeckers~~ and other  
306 forest birds in the predominantly tropical regions (Neotropics, Oriental, Afrotropical) contrast to  
307 more shallow slopes in the temperate/boreal regions (Palearctic, Nearctic). Macro-scale  
308 processes (e.g., as outlined by Gaston [47]), such as speciation events, are likely to account for  
309 some of these differences among zoogeographic regions. First, the overall richness of birds [48],  
310 including cavity-nesting birds [11], and also of trees as potential substrates for cavities [49],  
311 differs both among and within zoogeographic regions, likely inducing differences in tree-cavity-  
312 nesting assemblages [33]. However, variation in species composition and associated variation in  
313 functional richness (i.e., the variety of functional traits varies across spatial and environmental  
314 gradients, as has been shown, for example, for dietary guilds [44]), is likely to contribute most to  
315 spatial variation in nest-web assemblages across global scales. Specifically, with regards to nest-  
316 webs, species with the ability to excavate cavities are not randomly distributed across the world.  
317 For example, the Australasian region lacks the presence of Piciformes, the Order to which nearly  
318 75% of excavators belong [11], whereas speciation processes have led to a relatively high  
319 diversity of Piciformes in Southeast Asia [50, 51].

320 The observed spatial variation in the relationships between excavators and other forest  
321 birds within zoogeographic regions may stem mainly from local differences in habitat and  
322 vegetation characteristics (e.g., tree species composition and climatic variables [52]) as well as

1  
2  
3 323 spatial variation in tree cavity availability and their formation agents [53], rather than from  
4 324 speciation processes. Such differences would, for example, explain how in the Neotropics,  
5 325 cavity-nesting assemblages studied in the temperate mountain forests of Chile [54] had a 1:6  
6 326 ratio of excavators (4 species) to secondary cavity-nesters (25 species) whereas a subtropical  
7 327 Atlantic moist forest [32] supported relatively higher numbers of excavators with a 1:3 ratio of  
8 328 excavators (9 species) to secondary cavity-nesters (25 species). An important factor to consider  
9 329 here is the potential for regional variation in cavity substrate availability (e.g., large trees) and  
10 330 the supply of decay-formed cavities due to differences in the onset and rate of decay processes as  
11 331 well as forest management (e.g., [55-57]). For example, retention of large trees can, in many  
12 332 forests, provide nesting and roosting opportunities for additional species as both opportunities for  
13 333 excavation and processes of decay become more prevalent.

14 334 In addition, we can hypothesize that at least some variation at regional scales stems from  
15 335 differences in the propensities for re-use of excavated cavities by secondary cavity-nesters. For  
16 336 example, there are signs that non-excavating cavity-nesters may experience higher predation risk  
17 337 in excavated versus decay-formed cavities, which may induce a preference for decay-formed  
18 338 cavities among secondary users if decay-formed cavities are in sufficient supply (e.g., a pattern  
19 339 found in some of the few unmanaged temperate forests in the European parts of the Palearctic;  
20 340 [58, 59]). In turn, the availability of decay-formed cavities may correspond to the  
21 341 aforementioned historical or current forest management practices as well as spatial patterns in  
22 342 climatic factors. For example, proportions of decay-formed cavities used are particularly high in  
23 343 parts of the world with high amounts of precipitation and more active regimes of fungal growth  
24 344 (e.g., most of the wet tropics), with both being lower in anthropogenically-disturbed landscapes  
25 345 than in primary forests [53]. In turn, high availability of decay-formed cavities might allow for a  
26 346 relatively high richness of secondary cavity-nesters, with fewer species dependent on excavators  
27 347 for the supply of nest-cavities. For example, even woodpeckers, commonly considered primary  
28 348 excavators, occasionally use decay-formed cavities in Neotropical temperate rainforests where  
29 349 tree decay is the key driver of nest-web structure [54].

30 350 Finally, we find that relatively higher numbers of secondary cavity-nesters, or cavity-  
31 351 nesters in general, may occur in regions where many species are habitat generalists that utilize  
32 352 other nest substrates than tree-cavities (e.g., 40% of cavity nesters in Neotropical temperate  
33 353 forests are facultative users of tree cavities for nesting [54]), as compared to regions where most  
34 354 cavity nesters are obligate tree-cavity users (e.g., over 85% of cavity nesters in temperate  
35 355 Nearctic forests [59]). Finally, it is worth noting that cavity availability and use are also likely to  
36 356 be influenced by cavity persistence (longevity) characteristic that can have considerable spatial  
37 357 variation due to factors such as land-use patterns (e.g., logging), climatic factors (e.g., rainfall),  
38 358 and cavity characteristics (e.g., whether they are located in live or dead trees [60-62]).

39 359 We detected relative differences in strengths among the relationships between  
40 360 excavators/woodpeckers and secondary cavity-nesters, forest birds, and forest specialists across  
41 361 zoogeographic regions. These differences were most likely to stem from the same variation  
42 362 among species and ecosystem characteristics discussed above (e.g., the distribution and relative  
43 363 importance of cavity-forming agents), and indicate that richness of excavators/woodpeckers may  
44 364 be a better indicator of richness of other cavity and forest-associated species in one region than in  
45 365 another. In addition, the relative strength of relationships between excavators and other forest  
46 366 birds might reflect whether excavators are indicative of the richness of other species due to  
47 367 shared associations with particular forest elements (indirect association), due to their direct  
48 368 facilitation of nest cavities (direct facilitation), or whether both factors play a role. For example,

we found that relationships between excavator and forest bird or forest specialist richness in the Afrotropics are relatively strong, whereas the relationship between excavators and secondary cavity-nesters is comparatively weaker. This might indicate that, in the Afrotropics, excavators are especially strong predictors of other groups of forest-associated birds through their mutual habitat requirements, rather than through their direct facilitation of tree-cavities. In contrast, excavators are relatively stronger predictors of secondary cavity-nesters in the Oriental region, which might lead to hypotheses that excavators play a more direct, nest-web structuring role through the provision of cavities in the Oriental region.

Some secondary cavity-nesters might use cavities created by multiple excavator species, whereas others predominantly use cavities formed by processes of degradation, damage or insect activity [31, 32, 39]. In addition, certain excavators might be especially abundant or provide cavities that are very commonly reused by several species, whereas others are scarce and leave only a few short-lived cavities that would not be generally available for use by secondary cavity-nesters. Given such complexities among nest-web interactions, it is important to emphasize that we present general global patterns in the composition of tree-cavity-using assemblages (i.e., communities of linked species that often interact within networks). We lack evidence for direct causal links between the presence of one species group with another, as well as direct evidence of species interactions at the zoogeographic regional scale.

Around the world, we found relationships of a universal nature (strong and positive) between excavator and forest bird richness. ~~such, we deem excavators, of which woodpeckers are an important subset,~~ to be useful indicator species for forest bird diversity at multiple spatial scales. They form a small and fairly easy to identify (even by citizen scientists) subset of a larger group of species (forest birds) often studied to understand the effects of anthropogenic disturbances. Studies of excavators ~~(or woodpeckers specifically)~~, especially in high biodiversity tropical regions, might provide quick measures of forest quality and biodiversity, which may in turn guide forest management decisions (e.g., improving the retention of large trees). A comprehensive study of all forest birds in some regions like the Amazon or Congo basin would require considerable local expertise and training, which is often difficult to achieve due to social and monetary limitations. Thus, we conclude, excavators have excellent potential as study subjects for conservation monitoring and planning initiatives, in comparative research, and to guide the establishment of region-wide forest conservation strategies, especially in the largely understudied tropical regions of the world.

## Acknowledgments

We would like to thank Lisa Manne, and Kristina Cockle and two anonymous reviewers for their critical remarks on drafts of this article.

## References

- 1 Allan JR, Venter O, Maxwell S, Bertzky B, Jones K, Shi Y, Watson JE. 2017 Recent increases in human pressure and forest loss threaten many Natural World Heritage Sites. *Biological conservation*. **206**, 47-55.
- 2 Hansen MC, Stehman SV, Potapov PV. 2010 Quantification of global gross forest cover loss. *Proceedings of the National Academy of Sciences*. **107**, 8650-8655.
- 3 Barlow J, Lennox GD, Ferreira J, Berenguer E, Lees AC, Mac Nally R, Thomson JR, de Barros Ferraz SF, Louzada J, Oliveira VHF. 2016 Anthropogenic disturbance in tropical forests can double biodiversity loss from deforestation. *Nature*. **535**, 144.

- 1  
2  
3 415 4 Gaston KJ, Blackburn TM, Goldewijk KK. 2003 Habitat conversion and global avian biodiversity loss.  
4 416 *Proceedings of the Royal Society of London. Series B: Biological Sciences.* **270**, 1293-1300.
- 5 417 5 Betts MG, Wolf C, Pfeifer M, Banks-Leite C, Arroyo-Rodríguez V, Ribeiro DB, Barlow J, Eigenbrod F,  
6 418 Faria D, Fletcher RJ. 2019 Extinction filters mediate the global effects of habitat fragmentation on  
7 419 animals. *Science.* **366**, 1236-1239.
- 8 420 6 Carignan V, Villard M-A. 2002 Selecting indicator species to monitor ecological integrity: a review.  
9 421 *Environmental monitoring and assessment.* **78**, 45-61.
- 10 422 7 Canterbury GE, Martin TE, Petit DR, Petit LJ, Bradford DF. 2000 Bird communities and habitat as  
11 423 ecological indicators of forest condition in regional monitoring. *Conservation Biology.* **14**, 544-558.
- 12 424 8 Venier LA, Pearce JL. 2004 Birds as indicators of sustainable forest management. *The Forestry*  
13 425 *Chronicle.* **80**, 61-66.
- 14 426 9 Martin K, Ibarra JT, Drever M. 2015 Avian surrogates in terrestrial ecosystems: theory and practice. In  
15 427 *Indicators and surrogates of biodiversity and environmental change* (eds D Lindenmayer, P Barton, J  
16 428 Pierson), pp 33-44. Melbourne & London: CSIRO Publishing & CRC Press.
- 17 429 10 Ibarra JT, Martin M, Cockle KL, Martin K. 2017 Maintaining ecosystem resilience: functional  
18 430 responses of tree cavity nesters to logging in temperate forests of the Americas. *Scientific reports.* **7**,  
19 431 4467.
- 20 432 11 van der Hoek Y, Gaona GV, Martin K. 2017 The diversity, distribution and conservation status of the  
21 433 tree-cavity-nesting birds of the world. *Diversity and Distributions.* **23**, 1120-1131.
- 22 434 12 McClelland BR, McClelland PT. 1999 Pileated woodpecker nest and roost trees in Montana: links with  
23 435 old-growth and forest" health". *Wildlife Society Bulletin.* 846-857.
- 24 436 13 Stachura-Skierczyńska K, Kosiński Z. 2016 Do factors describing forest naturalness predict the  
25 437 occurrence and abundance of middle spotted woodpecker in different forest landscapes? *Ecological*  
26 438 *Indicators.* **60**, 832-844.
- 27 439 14 Marchetti M. 2005 *Monitoring and indicators of forest biodiversity in Europe: from ideas to*  
28 440 *operationality.* Joensuu, Finland: European Forest Institute.
- 29 441 15 Roberge J-M, Angelstam P. 2006 Indicator species among resident forest birds—a cross-regional  
30 442 evaluation in northern Europe. *Biological Conservation.* **130**, 134-147.
- 31 443 16 Virkkala R. 2006 Why study woodpeckers? The significance of woodpeckers in forest ecosystems.  
32 444 *Annales Zoologici Fennici.* 82-85.
- 33 445 17 Drever MC, Aitken KE, Norris AR, Martin K. 2008 Woodpeckers as reliable indicators of bird richness,  
34 446 forest health and harvest. *Biological conservation.* **141**, 624-634.
- 35 447 18 Drever MC, Martin K. 2010 Response of woodpeckers to changes in forest health and harvest:  
36 448 Implications for conservation of avian biodiversity. *Forest Ecology and Management.* **259**, 958-966.
- 37 449 19 Mikusiński G, Gromadzki M, Chylarecki P. 2001 Woodpeckers as indicators of forest bird diversity.  
38 450 *Conservation Biology.* **15**, 208-217.
- 39 451 20 Angelstam PK, Bütler R, Lazdinis M, Mikusiński G, Roberge J-M. 2003. Habitat thresholds for focal  
40 452 species at multiple scales and forest biodiversity conservation—dead wood as an example. *Annales*  
41 453 *Zoologici Fennici.* 473-482.
- 42 454 21 Nilsson SG, Hedin J, Niklasson M. 2001 Biodiversity and its assessment in boreal and nemoral forests.  
43 455 *Scandinavian Journal of Forest Research.* **16**, 10-26.
- 44 456 22 Hess GR, Bartel RA, Leidner AK, Rosenfeld KM, Rubino MJ, Snider SB, Ricketts TH. 2006 Effectiveness  
45 457 of biodiversity indicators varies with extent, grain, and region. *Biological Conservation.* **132**, 448-457.
- 46 458 23 Collen B, Ram M, Zamin T, McRae L. 2008 The tropical biodiversity data gap: addressing disparity in  
47 459 global monitoring. *Tropical Conservation Science.* **1**, 75-88.
- 48 460 24 Ilsøe SK, Kissling WD, Fjeldså J, Sandel B, Svenning JC. 2017 Global variation in woodpecker species  
49 461 richness shaped by tree availability. *Journal of Biogeography.* **44**, 1824-1835.

- 1  
2  
3 462 25 Bell D, Hjältén J, Nilsson C, Jørgensen D, Johansson T. 2015 Forest restoration to attract a putative  
4 463 umbrella species, the white-backed woodpecker, benefited saproxylic beetles. *Ecosphere*. **6**, 1-14.  
5 464 26 Gatica-Saavedra P, Echeverría C, Nelson CR. 2017 Ecological indicators for assessing ecological  
6 465 success of forest restoration: a world review. *Restoration ecology*. **25**, 850-857.  
7 466 27 Hoyt JS, Hannon SJ. 2002 Habitat associations of black-backed and three-toed woodpeckers in the  
8 467 boreal forest of Alberta. *Canadian Journal of Forest Research*. **32**, 1881-1888.  
9 468 28 Tikkanen O-P, Martikainen P, Hyvärinen E, Junninen K, Kouki J. 2006. Red-listed boreal forest species  
10 469 of Finland: associations with forest structure, tree species, and decaying wood. *Annales Zoologici*  
11 470 *Fennici*. 373-383.  
12 471 29 Bütler R, Angelstam P, Ekelund P, Schlaepfer R. 2004 Dead wood threshold values for the three-toed  
13 472 woodpecker presence in boreal and sub-Alpine forest. *Biological Conservation*. **119**, 305-318.  
14 473 30 McLaren MA, Thompson ID, Baker JA. 1998 Selection of vertebrate wildlife indicators for monitoring  
15 474 sustainable forest management in Ontario. *The Forestry Chronicle*. **74**, 241-248.  
16 475 31 Martin K, Eadie JM. 1999 Nest webs: A community-wide approach to the management and  
17 476 conservation of cavity-nesting forest birds. *Forest Ecology and Management*. **115**, 243-257.  
18 477 32 Cockle KL, Martin K, Robledo G. 2012 Linking fungi, trees, and hole-using birds in a Neotropical tree-  
19 478 cavity network: Pathways of cavity production and implications for conservation. *Forest Ecology and*  
20 479 *Management*. **264**, 210-219.  
21 480 33 Cockle KL, Martin K, Wesolowski T. 2011 Woodpeckers, decay, and the future of cavity-nesting  
22 481 vertebrate communities worldwide. *Frontiers in Ecology and the Environment*. **9**, 377-382.  
23 482 34 Tylianakis JM, Klein AM, Lozada T, Tschardt T. 2006 Spatial scale of observation affects  $\alpha$ ,  $\beta$  and  $\gamma$   
24 483 diversity of cavity-nesting bees and wasps across a tropical land-use gradient. *Journal of Biogeography*.  
25 484 **33**, 1295-1304.  
26 485 35 Powell S, Costa AN, Lopes CT, Vasconcelos HL. 2011 Canopy connectivity and the availability of  
27 486 diverse nesting resources affect species coexistence in arboreal ants. *Journal of Animal Ecology*. **80**, 352-  
28 487 360.  
29 488 36 Bull EL, Jackson JA., 1995 Pileated Woodpecker (*Dryocopus pileatus*). In: *The birds of North America*  
30 489 (eds A Poole, F Gill). Washington DC: The Academy of Natural Sciences & The American Ornithologists'  
31 490 Union.  
32 491 37 Montellano MGN, Blendinger PG, Macchi L. 2013 Sap consumption by the White-fronted  
33 492 Woodpecker and its role in avian assemblage structure in dry forests. *The Condor*. **115**, 93-101.  
34 493 38 Jusino MA, Lindner DL, Banik MT, Rose KR, Walters JR. 2016 Experimental evidence of a symbiosis  
35 494 between red-cockaded woodpeckers and fungi. *Proceedings of the Royal Society B: Biological Sciences*.  
36 495 **283**, 20160106.  
37 496 39 Ruggera RA, Schaaf AA, Vivanco CG, Politi N, Rivera LO. 2016 Exploring nest webs in more detail to  
38 497 improve forest management. *Forest Ecology and Management*. **372**, 93-100.  
39 498 40 Betts MG, Wolf C, Ripple WJ, Phalan B, Millers KA, Duarte A, Butchart SH, Levi T. 2017 Global forest  
40 499 loss disproportionately erodes biodiversity in intact landscapes. *Nature*. **547**, 441-444.  
41 500 41 BirdLife International and NatureServe 2015 *Bird species distribution maps of the world*. Cambridge  
42 501 and Arlington: BirdLife International and NatureServe.  
43 502 42 Storch D, Davies RG, Zajíček S, Orme CDL, Olson V, Thomas GH, Ding TS, Rasmussen PC, Ridgely RS,  
44 503 Bennett PM. 2006 Energy, range dynamics and global species richness patterns: reconciling mid-domain  
45 504 effects and environmental determinants of avian diversity. *Ecology Letters*. **9**, 1308-1320.  
46 505 43 Pinheiro J, Bates D, DebRoy S, Sarkar D, Heisterkamp S, Van Willigen B. 2017 Package 'nlme'. *Linear*  
47 506 *and Nonlinear Mixed Effects Models, version 3-1*. Available from [https://cran.r-](https://cran.r-project.org/web/packages/nlme/nlme.pdf)  
48 507 [project.org/web/packages/nlme/nlme.pdf](https://cran.r-project.org/web/packages/nlme/nlme.pdf) (accessed January 15, 2018).

- 1  
2  
3 508 44 Kissling WD, Sekercioglu CH, Jetz W. 2012 Bird dietary guild richness across latitudes, environments  
4 509 and biogeographic regions. *Global Ecology and Biogeography*. **21**, 328-340.  
5 510 45 Hunter M, Westgate M, Barton P, Calhoun A, Pierson J, Tulloch A, Beger M, Branquinho C, Caro T,  
6 511 Gross J. 2016 Two roles for ecological surrogacy: Indicator surrogates and management surrogates.  
7 512 *Ecological Indicators*. **63**, 121-125.  
8 513 46 Stokland JN, Siitonen J, Jonsson BG. 2012 *Biodiversity in dead wood*. Cambridge, UK: Cambridge  
9 514 University Press.  
10 515 47 Gaston KJ. 2000 Global patterns in biodiversity. *Nature*. **405**, 220.  
11 516 48 Blackburn TM, Gaston KJ. 1996 Spatial patterns in the species richness of birds in the New World.  
12 517 *Ecography*. **19**, 369-376.  
13 518 49 Currie DJ, Paquin V. 1987 Large-scale biogeographical patterns of species richness of trees. *Nature*.  
14 519 **329**, 326-327.  
15 520 50 Benz BW, Robbins MB, Peterson AT. 2006 Evolutionary history of woodpeckers and allies (Aves:  
16 521 Picidae): placing key taxa on the phylogenetic tree. *Molecular phylogenetics and evolution*. **40**, 389-399.  
17 522 51 Mikusiński G. 2006 Woodpeckers: distribution, conservation, and research in a global perspective.  
18 523 *Annales Zoologici Fennici*. 86-95.  
19 524 52 Huston MA. 1999 Local processes and regional patterns: appropriate scales for understanding  
20 525 variation in the diversity of plants and animals. *Oikos*. **86**, 393-401.  
21 526 53 Remm J, Löhmus A. 2011 Tree cavities in forests—the broad distribution pattern of a keystone  
22 527 structure for biodiversity. *Forest Ecology and Management*. **262**, 579-585.  
23 528 54 Altamirano TA, Ibarra JT, Martin K, Bonacic C. 2017 The conservation value of tree decay processes as  
24 529 a key driver structuring tree cavity nest webs in South American temperate rainforests. *Biodiversity and*  
25 530 *Conservation*. **26**, 2453-2472.  
26 531 55 Andersson J, Domingo Gómez E, Michon S, Roberge J-M. 2018 Tree cavity densities and  
27 532 characteristics in managed and unmanaged Swedish boreal forest. *Scandinavian journal of forest*  
28 533 *research*. **33**, 233-244.  
29 534 56 Goodburn JM, Lorimer CG. 1998 Cavity trees and coarse woody debris in old-growth and managed  
30 535 northern hardwood forests in Wisconsin and Michigan. *Canadian Journal of Forest Research*. **28**, 427-  
31 536 438.  
32 537 57 Gutzat F, Dormann CF. 2018 Decaying trees improve nesting opportunities for cavity-nesting birds in  
33 538 temperate and boreal forests: A meta-analysis and implications for retention forestry. *Ecology and*  
34 539 *evolution*. **8**, 8616-8626.  
35 540 58 Wesolowski T, Tomialojc L. 2005 Nest sites, nest depredation, and productivity of avian broods in a  
36 541 primeval temperate forest: do the generalisations hold? *Journal of Avian Biology*. **36**, 361-367.  
37 542 59 Wesolowski T, Martin K. 2018 Tree Holes and Hole-Nesting Birds in European and North American  
38 543 Forests. In *Ecology and Conservation of Forest Birds* (eds G Mikusinski, J-M Roberge, RJ Fuller), pp 79-  
39 544 134. Cambridge, UK: Cambridge University Press.  
40 545 60 Edworthy AB, Wiebe KL, Martin K. 2012 Survival analysis of a critical resource for cavity-nesting  
41 546 communities: patterns of tree cavity longevity. *Ecological Applications*. **22**, 1733-1742.  
42 547 61 Cockle KL, Martin K, Bodrati A. 2017 Persistence and loss of tree cavities used by birds in the  
43 548 subtropical Atlantic Forest. *Forest ecology and management*. **384**, 200-207.  
44 549 62 Wesolowski T. 2011 “Lifespan” of woodpecker-made holes in a primeval temperate forest: A thirty  
45 550 year study. *Forest ecology and management*. **262**, 1846-1852.  
46  
47  
48  
49  
50  
51  
52  
53 551  
54  
55  
56  
57  
58  
59  
60



**Table 1. Results of generalized least square models of possible correlations between (1) excavator and secondary cavity-nester richness, (2) excavator and forest bird richness, (3) excavator and forest specialist richness.** Each result reflects the mean outcome of 1000 models build with 1000 randomly selected grid cell data points that include an exponential spatial covariance structure. The mean Spearman rho was calculated over the fit of each of 1000 models to a test data set.

| Zoogeographic region | Correlation | Mean Slope (Min. – Max.; SD) | % of models with $P < 0.05$ | Mean Spearman rho |
|----------------------|-------------|------------------------------|-----------------------------|-------------------|
| Nearctic             | 1           | 0.8 (0.4 - 1.3; 0.1)         | 60                          | 0.73              |
|                      | 2           | 4.3 (3.3 - 5.9; 0.4)         | 63                          | 0.84              |
|                      | 3           | 1.4 (1.2 - 1.6; 0.1)         | 71                          | 0.71              |
| Palearctic           | 1           | 1.1 (0.7 - 1.4; 0.1)         | 84                          | 0.78              |
|                      | 2           | 4.9 (4.0 - 6.7; 0.4)         | 73                          | 0.85              |
|                      | 3           | 1.1 (0.8 - 1.7; 0.1)         | 83                          | 0.79              |
| Oriental             | 1           | 0.7 (0.6 - 0.9; 0.0)         | 100                         | 0.88              |
|                      | 2           | 5.7 (4.9 - 6.6; 0.3)         | 100                         | 0.86              |
|                      | 3           | 1.6 (1.3 - 1.9; 0.1)         | 100                         | 0.77              |
| Neotropical          | 1           | 2.4 (1.9 - 3.0; 0.2)         | 83                          | 0.95              |
|                      | 2           | 10.8 (9.1 - 14.0; 0.7)       | 72                          | 0.97              |
|                      | 3           | 4.2 (3.4 - 5.2; 0.2)         | 72                          | 0.96              |
| Afrotropical         | 1           | 1.1 (0.7 - 1.9; 0.2)         | 76                          | 0.79              |
|                      | 2           | 6.8 (5.0 - 9.8; 0.9)         | 73                          | 0.94              |
|                      | 3           | 0.9 (0.6 - 1.5; 0.1)         | 79                          | 0.88              |
| Australasian         | 1           | 1.8 (1.4 - 2.2; 0.1)         | 88                          | -0.14             |
|                      | 2           | 7.5 (2.3 - 11.2; 1.3)        | 100                         | 0.31              |
|                      | 3           | 1.0 (-0.1 - 2.0; 0.3)        | 97                          | 0.69              |

558  
559  
560  
561  
562  
563  
564  
565  
566  
567  
568  
569  
570  
571  
572  
573  
574  
575

**Table 2. Results of generalized least square models of possible correlations between (1) woodpecker and secondary cavity-nester richness, (2) woodpecker and forest bird richness, and (3) woodpecker and forest specialist richness.** Each result reflects the mean outcome of 1000 models build with 1000 randomly selected grid cell data points that include an exponential spatial covariance structure. The mean Spearman rho was calculated over the fit of each of 1000 models to a test data set.

| Zoogeographic region | Correlation | Mean Slope (Min. – Max.; SD) | % of models with $P < 0.05$ | Mean Spearman rho |
|----------------------|-------------|------------------------------|-----------------------------|-------------------|
| Nearctic             | 1           | 1.0 (0.5 - 1.6; 0.2)         | 61                          | 0.70              |
|                      | 2           | 5.3 (3.7 - 8.0; 0.7)         | 67                          | 0.79              |
|                      | 3           | 1.7 (1.1 - 2.2; 0.1)         | 70                          | 0.63              |
| Palearctic           | 1           | 1.2 (0.9 - 2.3; 0.1)         | 81                          | 0.79              |
|                      | 2           | 5.6 (4.3 - 8.1; 0.6)         | 73                          | 0.83              |
|                      | 3           | 1.3 (0.9 - 2.0; 0.2)         | 82                          | 0.73              |
| Oriental             | 1           | 1.0 (0.8 - 1.3; 0.1)         | 100                         | 0.88              |
|                      | 2           | 7.9 (6.6 - 9.8; 0.5)         | 100                         | 0.88              |
|                      | 3           | 2.2 (1.7 - 2.6; 0.1)         | 100                         | 0.80              |
| Neotropical          | 1           | 3.3 (2.4 - 4.9; 0.4)         | 68                          | 0.94              |
|                      | 2           | 14.3 (10.8 - 20.5; 1.6)      | 67                          | 0.93              |
|                      | 3           | 5.2 (3.9 - 6.6; 0.5)         | 73                          | 0.88              |
| Afrotropical         | 1           | 1.6 (0.9 - 3.5; 0.4)         | 72                          | 0.74              |
|                      | 2           | 9.9 (6.4 - 19.6; 1.9)        | 69                          | 0.86              |
|                      | 3           | 1.3 (0.7 - 3.2; 0.3)         | 80                          | 0.81              |
| Australasian         | 1           | 1.9 (-0.1 - 4.4; 0.6)        | 81                          | -0.33             |
|                      | 2           | 8.6 (1.2 - 21.8; 2.4)        | 75                          | -0.30             |
|                      | 3           | 3.9 (-0.2 - 9.0; 1.2)        | 96                          | -0.08             |

582  
583  
584  
585  
586  
587  
588  
589  
590  
591  
592  
593  
594  
595  
596  
597  
598  
599

1  
2  
3 **600 Figure legends**  
4

5 601

6  
7 **602 Figure 1. Global map of the relative richness of tree cavity excavators versus secondary**  
8 **603 cavity-nesting birds (expressed as the ratio excavator / secondary cavity-nester) in 10x10**  
9 **604 km grid cells.** Low values (light colors) indicate relatively low numbers of excavators as  
10 compared to secondary cavity-nesters (or, inversely, relatively high numbers of secondary  
11 ~~cavity-nesters~~) while high values (dark colors) indicate a relatively higher proportion of  
12 excavators to secondary cavity-nesters.  
13 607

14  
15 608

16  
17 **609 Figure 2. Scatter plots of the correlation between the richness (number of species) of**  
18 **610 excavators and all forest birds (upper row), all forest specialists (middle row), and all non-**  
19 **611 excavating cavity-nesters (bottom row) in six zoogeographic regions.** Points represent species  
20 richness values in 10x10 km grid cells, and the solid line represents the fit of a linear regression  
21 model, created using all grid cell values.  
22 613

23 614

24 615

25 616

26 617

27 618

28 619

29 620

30 621

31 622

32 623

33 624

34 625

35 626

36 627

37 628

38 629

39 630

40 631

41 632

42

43

44

45

46

47

48

49

50

51

52

53

54

55

56

57

58

59

60

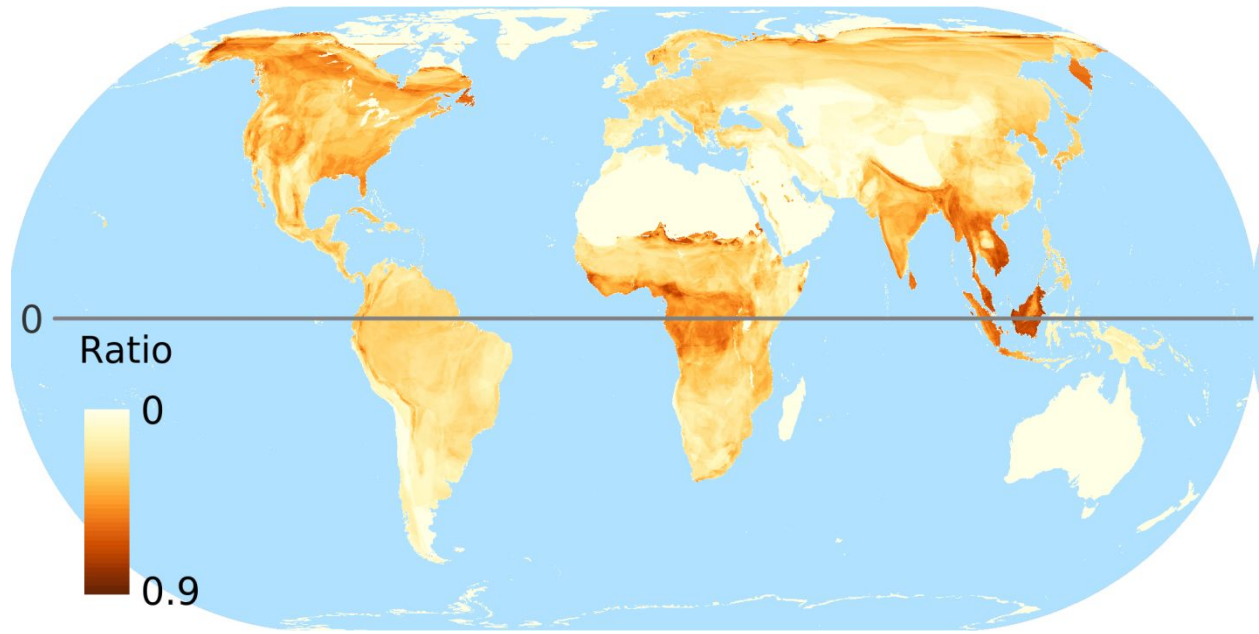

**Figure 1.**

633  
634  
635  
636  
637  
638  
639  
640  
641  
642  
643  
644  
645  
646  
647  
648  
649  
650  
651  
652  
653  
654  
655  
656  
657  
658

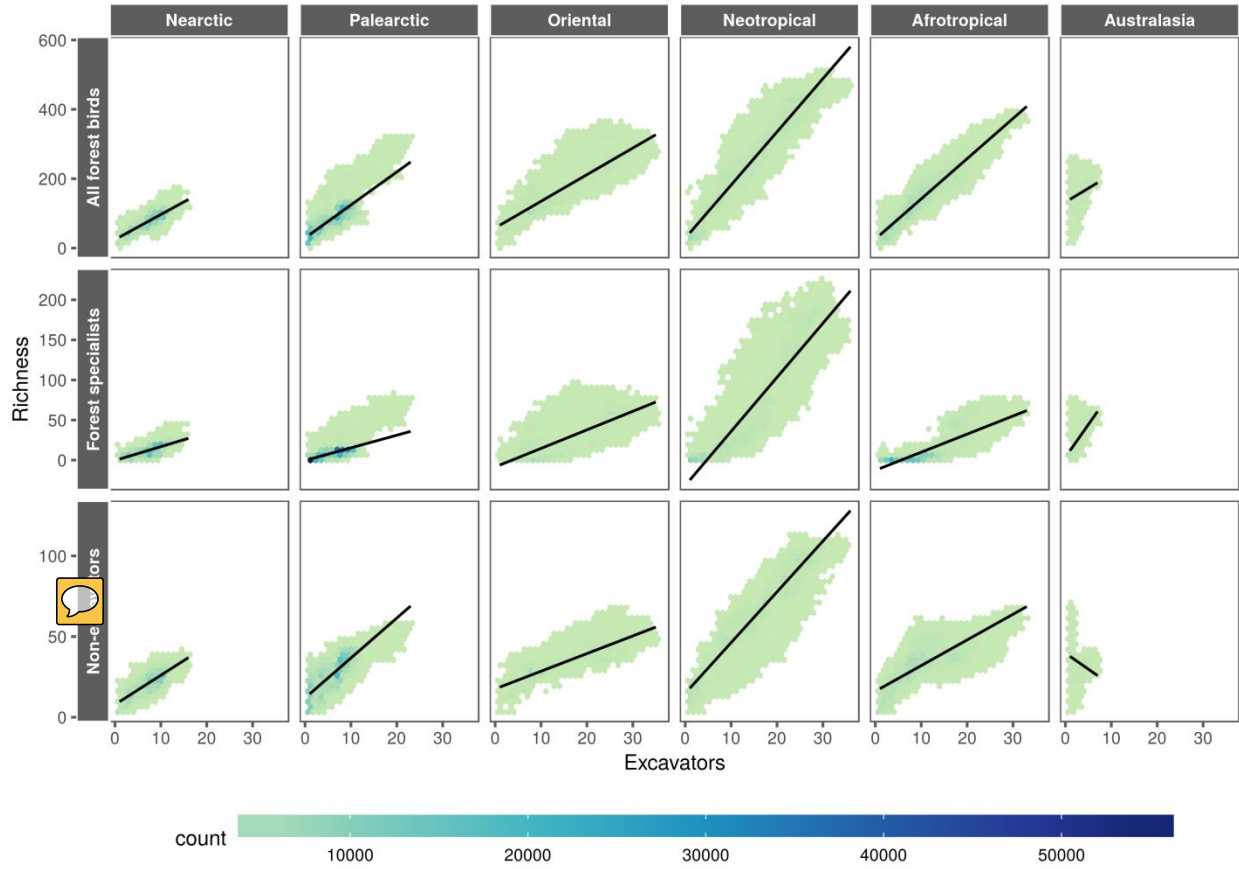

Figure 2.

659  
660  
661  
662  
663  
664  
665  
666  
667  
668  
669  
670  
671  
672  
673  
674  
675  
676  
677  
678  
679  
680  
681

1  
2  
3 682  
4 683  
5 684  
6 685  
7 686  
8 687  
9 688  
10 689  
11 690  
12 691  
13 692  
14 693  
15 694  
16 695  
17 696  
18 697  
19 698  
20 699  
21 700  
22 701  
23 702  
24  
25  
26  
27  
28  
29  
30  
31  
32  
33  
34  
35  
36  
37  
38  
39  
40  
41  
42  
43  
44  
45  
46  
47  
48  
49  
50  
51  
52  
53  
54  
55  
56  
57  
58  
59  
60

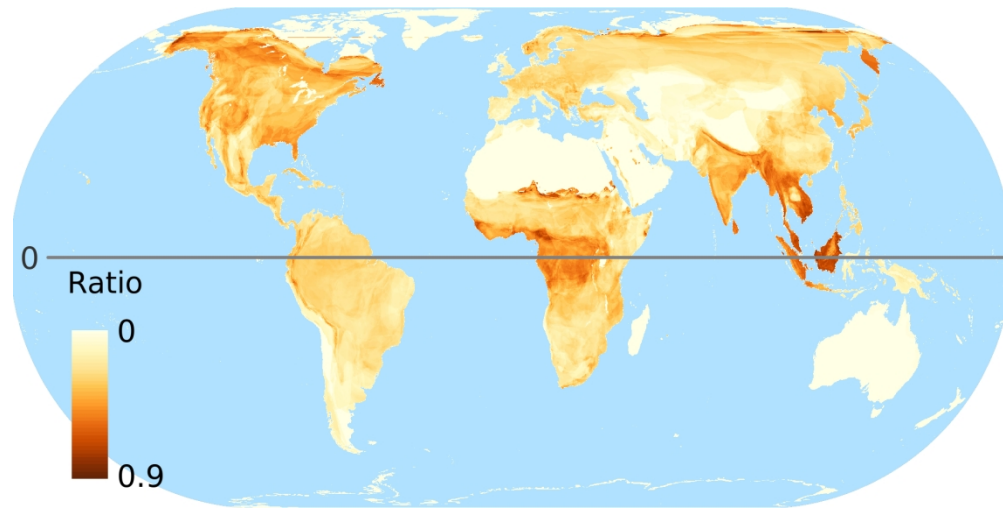

Figure 1. Global map of the relative richness of tree cavity excavators versus secondary cavity-nesting birds (expressed as the ratio excavator / secondary cavity-nester) in 10x10 km grid cells. Low values (light colors) indicate relatively low numbers of excavators as compared to secondary cavity-nesters (or, inversely, relatively high numbers of secondary cavity-nesters) while high values (dark colors) indicate a relatively higher proportion of excavators to secondary cavity-nesters.

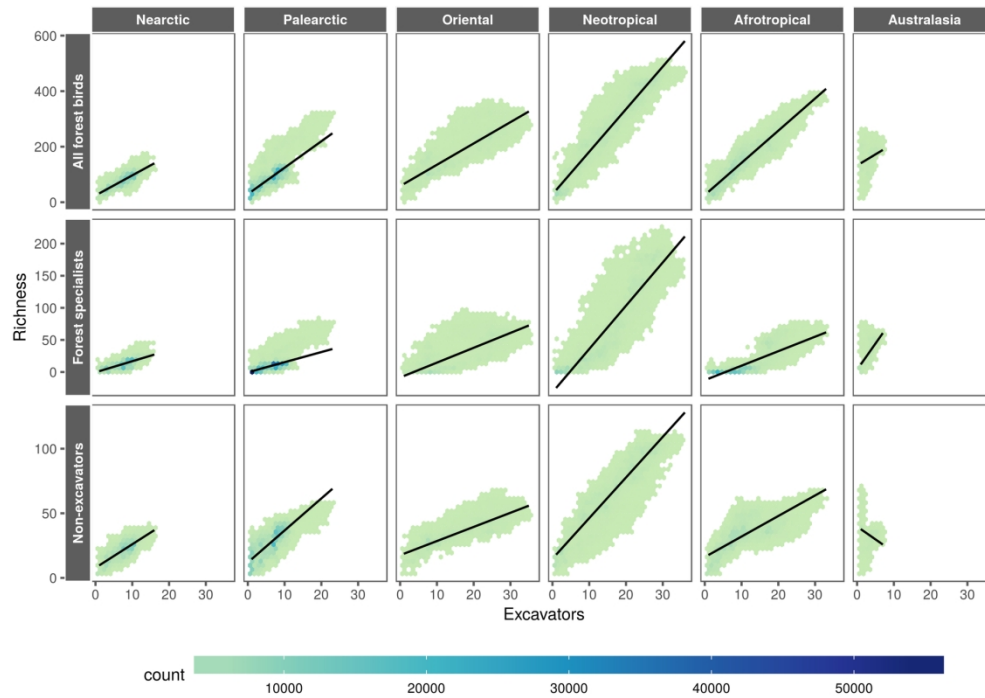

Figure 2. Scatter plots of the correlation between the richness (number of species) of excavators and all forest birds (upper row), all forest specialists (middle row), and all non-excavating cavity-nesters (bottom row) in six zoogeographic regions. Points represent species richness values in 10x10 km grid cells, and the solid line represents the fit of a linear regression model, created using all grid cell values.

167x119mm (300 x 300 DPI)



1  
2  
3 Authors Response letter to editor:  
4

5 I am recommending a "reject/resub" decision because our "revision" turnaround time  
6 may be too short for the authors' needs in revising, and because the reviewers have  
7 raised extensive concerns, despite being encouraging overall about the manuscript.  
8  
9

10 They see issues with how the main problem of the study is set out, the methods, the  
11 evaluation, and the conclusions. They also note a geographic bias that may entail  
12 ecological biases in the relationships of excavators to their ecosystems.  
13

14 If you elect to re-submit, please detail your responses to reviewers' comments and  
15 make clear how you have altered your re-submitted manuscript. Best wishes with your  
16 revisions.  
17  
18  
19  
20

21 Reviewers' Comments to Author:

22 Reviewer: 1  
23  
24

25 General comment:

26 The manuscript entitled "Global and universal relationships between tree-cavity  
27 excavators and forest bird richness." reports on an interesting exploratory study linking  
28 woodpeckers/other tree cavity excavators, secondary cavity users and other forest tree  
29 species at the global and bioregional levels. The results are useful and may inspire new  
30 studies exploring these relationships more in-depth.  
31  
32

33 **RESPONSE: We thank the reviewer for their supportive comments.**  
34

35 My main criticism concerns the quality of reasoning and how and to what extent  
36 different issues are introduced and discussed. Proposing the use of certain group of  
37 species as indicators or other type of indicator species shall rest on solid grounds as  
38 well as need of such indicators should be clearly put forward. I simply miss the  
39 delineation of the conservation/management problem why we need indicators. There  
40 are many articles published on the worldwide decline of primary/intact forests, their  
41 characteristics and, in my opinion, you do not use the opportunity to discuss the  
42 potential role of woodpeckers/other tree cavity excavators (with very intimate linkages to  
43 natural forest characteristics) to support your case. Also, even if you mention their  
44 usefulness in management, there is lacking information on the intensively managed  
45 forests as areas that lose both important characteristics linked to old-growth forests and  
46 forests with high level of naturalness and thereby lose most specialized forest species  
47 often being woodpeckers.  
48  
49  
50

51 **RESPONSE: We thank the reviewer for pointing out these ways to strengthen our**  
52 **text. We have added arguments and citations to strengthen these points**  
53 **throughout the Introduction (e.g., lines 96-98).**  
54  
55  
56  
57  
58  
59  
60

1  
2  
3 Also use of woodpeckers/other excavators as indicators of successful forest restoration  
4 could be mentionaed. There is large body of literature on both above topics and I  
5 suggest that you should add paragraphs pertaining on these issues in both Introduction  
6 and Discussion sections. To limit the length of the article, you may get rid of several  
7 unnecessary repetitions. More suggestions below:

8 Detailed comments:

9 Line 99: Several species use smaller trees or snags too. Possibly add "often" or  
10 "usually".  
11  
12

13 **RESPONSE: We agree with the reviewer that there are many exceptions, for**  
14 **which we followed the suggestion to add 'often' to soften the generalization.**  
15  
16

17 Line 109: Woodpeckers (cavity excavators) are most often resident species what could  
18 additionally strengthen your reasoning on strong linkages to forest environments and  
19 their quality.  
20

21 **RESPONSE: We thank the reviewer for this valid point, and have incorporated a**  
22 **sentence to illustrate this in the second paragraph of our introduction.**  
23  
24  
25

26 Lines 127-133: Please consult Wesolowski and Martin (2018) and extend the discussion  
27 on mechanism a bit more. I am lacking a clear statement on two possible, non-  
28 excluding each other mechanisms of expected relationships as very nicely stated way  
29 down in Discussion (Lines 312-314).  
30

31 **RESPONSE: We thank the reviewer for this valid point. We agree that this is a key**  
32 **element of our manuscript that should be clarified much earlier in the text, and**  
33 **have a such included lines to address this topic in the very beginning of the**  
34 **Introduction.**  
35  
36

37 RESULTS: Could you add a summary table with numbers of species in different groups  
38 in different bioregions? It would provide some nice background for further discussions of  
39 results. You have those numbers already!  
40  
41

42 **RESPONSE: We understand that this might make it much easier to follow some of**  
43 **the reasoning, plus it would benefit authors who would like to build on our**  
44 **analyses. We have therefore followed your advice and added a supplementary**  
45 **table (Table S1) summarizing these data.**  
46  
47

48 Lines 224-231: I do not understand how you can model the relationship between  
49 woodpeckers and the three other groups in Australasia, where, as you state below,  
50 there is no woodpeckers or even other strong excavators are largely lacking.  
51

52 **RESPONSE: Thank you for pointing this out, this is indeed a mistake. We have**  
53 **removed the 'woodpecker part' for Australasia and have added text to make this**  
54 **clear in methods as well ('We repeated all of these analyses for woodpeckers as a**  
55  
56  
57  
58  
59  
60

1  
2  
3 **subset of the excavators, with the notable exception of Australasia where**  
4 **woodpeckers are absent.’)**  
5

6 DISCUSSION: a bit confusing use of words “excavators/woodpeckers” (Line 244) and  
7 “excavators” (Line 275). Please check if necessary to use both of them!  
8  
9

10 **RESPONSE: We agree that this is a bit confusing and have simplified this, by**  
11 **simply using excavator/woodpecker when an argument or explanation concerns**  
12 **both groups equally and ‘excavator’ or ‘woodpecker’ by itself if it is particular to**  
13 **only one of these groups (e.g., when evidence does not extend beyond**  
14 **woodpeckers or when discussing specific results (e.g., ratios)).**  
15  
16

17 Lines 239-243: Worthy to mention that forests in some bioregions supply decay-formed  
18 cavities in high numbers (particularly non-managed forests) and some other not (e.g.  
19 boreal forest in Europe – see Andersson et al. (2018): Andersson J., Domingo Gomez  
20 E., Michon S., Roberge J.-M. (2018) Tree cavity densities and characteristics in  
21 managed and unmanaged Swedish boreal forest. Scandinavian Journal of Forest  
22 Research, 33 (3), pp. 233-244. It would add the management angle in discussion about  
23 the role of woodpeckers/excavators for other species.  
24  
25

26 **RESPONSE: We have added more text on this (esp. lines 304-309) including the**  
27 **reference suggested. We absolutely agree that this is a key element of the story,**  
28 **yet we aimed not to add too much to an already rather lengthy manuscript.**  
29  
30

31 Lines 272-273: Please refer to studies on the global species richness of woodpeckers  
32 e.g. Mikusinski, G. 2006. Woodpeckers (Picidae) - distribution, conservation and  
33 research in a global perspective. Annales Zoologici Fennici 43: 86–95.  
34  
35

36 **RESPONSE: We have added this reference.**  
37

38 Lines 289-294: Refer also to the “primeval” Bialowieza Forest case in temperate zone  
39 being in stark contrast to managed forests (i.e. higher predation risk and subsequently  
40 preference for decay-formed cavities among secondary users. See: Wesolowski and  
41 Martin (2018) and references therein.  
42  
43

44 **RESPONSE: We have added a section on this, including additional references.**  
45  
46

47 Lines 299-304: Please refer to papers by Wesolowski here: Wesolowski T.  
48 2011. "Lifespan" of woodpecker-made holes in a primeval temperate forest: A thirty year  
49 study. Forest Ecology and Management, 262 (9) , pp. 1846-1852.  
50  
51

52 **RESPONSE: We added this reference.**  
53  
54

55 Reviewer 2:  
56  
57  
58  
59  
60

1  
2  
3 What is the difference between ‘global’ and ‘universal’. There is nothing in the introduction, nor  
4 in the discussion, justifying the usage of these two words. I suggest to delete ‘universal’  
5

6 **RESPONSE: We thank the reviewer for this remark, it made it clear to us that we needed**  
7 **to clarify these terms. When we use the term ‘global’ we imply that these relationships can**  
8 **be found in nearly every region of the world, with ‘universal’ we mean that they are of**  
9 **similar nature (strong and positive).**  
10

11  
12 **We clarify these terms in both the Introduction and the Discussion (e.g., by adding that**  
13 **‘Around the world, we can find relationships of a universal nature (strong and positive)**  
14 **between excavator and forest bird richness.’).**  
15

16 I see this paragraph as mostly unnecessary, with some of this information that can be fused  
17 with the second paragraph  
18

19 **RESPONSE: We understand that this start of the Introduction could be stronger, highlighting both the**  
20 **problem (need for indicators) and the opportunity (excavators/woodpeckers could make great**  
21 **indicators). We have reworked the introduction to accommodate these changes.**  
22

23  
24 **The reviewer mentions multiple inconsistencies in citations/references, we have now adopted the**  
25 **‘Open Biology/Royal Society Open Science’ style and all issues should be resolved.**  
26

27 I am not aware of this. I’ve seen some parrot species burrowing their own cavities in termitaria and  
28 cliffs, or ‘arranging’ cavities already done by woodpeckers or fungi. But I have not seen/heard about  
29 parrots excavating ‘brand new’ cavities in trees. Please, could you add a reference for that?  
30  
31

32  
33 **RESPONSE: Although not common, parrots especially in Australasia may excavate in trunks that are in**  
34 **advanced stages of decay, without there having been a previous cavity, see e.g., Courtney, J. 2010. An**  
35 **Observation of Nesting Behaviour in Marshall's Fig-Parrot 'Cyclopsitta diophthalma marshalli'.**  
36 **Australian Field Ornithology, Vol. 27, No. 4, Dec 149-152.**  
37

38  
39 .....So, unless you have a better argumentation for this association at a global scale, I suggest to delete  
40 this part.  
41

42 **RESPONSE: We have, in this new version, followed up on your suggestion and removed this statement**  
43 **that the response of woodpeckers can be indicative of that of forest birds in general.**  
44

45 This is not what Cockle et al. (2011) found. According to the map in the Figure 2a, you can see that the  
46 pattern that you mention (excavated cavities as main source for non-excavator birds) is only strong in  
47 North America, very weak in Europe (only 1 out of 4 studies showed that pattern), and opposite in South  
48 America and Australia, this is, non-excavator birds mainly used decay formed cavities (there is no study  
49 in Africa). After Cockle et al. (2011), Ruggera et al. (2016) quoted “Therefore, in the PF woodpeckers do  
50 not seem to play a key role in provisioning cavities to the nest-web, a pattern also shown for other  
51 South American and some European forests, and contrary to the findings in North America (Cockle et al.,  
52 2011a,b; Pereira et al., 2009; Wesolowski, 2007).” Please, be careful when citing other authors, and put  
53 strictly what they have found.  
54  
55  
56  
57  
58  
59  
60

1  
2  
3 **RESPONSE: We agree that we may have overstated the importance of excavators for the provision of**  
4 **cavities, and have altered our language accordingly (e.g., stating that ‘cavity formation by excavation**  
5 **is an importance source of nest holes for species in many regions of the world’). However, Cockle et**  
6 **al. has shown that woodpeckers are an important provider of cavities in farmlands and altered forests**  
7 **in Argentina. Thus, even in South America, woodpeckers may provide a larger role in the provisioning**  
8 **of tree cavities than currently recognized.**

- 9  
10  
11
  - Please, see the previous comment on this pattern. Actually, it seems that woodpeckers play a

12 considerably smaller role than that you stated, as cavity providers in many non-disturbed

13 ecosystems. If my previous comment is correct, how is this prediction held?

14

15 **RESPONSE: We think this new version of our manuscript does a better job at highlighting the two**  
16 **mechanisms by which excavators are indicators: due to their associations with particular forest**  
17 **elements and their role in facilitating the presence of other species through the provision of nest**  
18 **cavities. We therefore think this prediction is still valid, but we did alter the text to recognize this**  
19 **point:**

20  
21  
22 **“Nevertheless, we might predict that these birds could be reliable indicators of avian diversity and**  
23 **richness not only at stand or landscape-levels (8, 17), but also across large regions at a global scale,**  
24 **not only for the cavities that excavators supply but also due to excavators’ associations with forest**  
25 **elements that are indicative of heterogeneous forests with a high degree of naturalness.”**

26  
27 I see necessary to call to this group with something that recalls that are cavity users, because both forest  
28 specialist species and forest birds in general include also non-excavator bird species. An option can be  
29 ‘secondary cavity-nesters’

30

31  
32 **RESPONSE: We have followed this useful suggestion and have changed non-excavator to ‘secondary**  
33 **cavity-nester’ throughout the text.**

34

35 Here or in Methods: it’s necessary to clarify if these categories are mutually exclusive. For example,  
36 some secondary cavity-nesters are forest specialists, and of course, are also forest birds in general.  
37 These species are considered in the three categories or only in the ‘non-excavator’ category? How this  
38 nested data set would eventually influence your results?

39

40  
41 **RESPONSE: We added a sentence in the Methods to explain that some of these numbers are indeed**  
42 **nested, with for example a forest specialist also being counted as a forest bird. We can see how it**  
43 **could be interesting to know (for example) details on the relationship between excavators and forest**  
44 **specialists that do not nest in cavities, which we do not provide at this point. One reason for this is**  
45 **that sample size for many grid cells would become too low for our models to converge, particularly**  
46 **when we would count forest specialists that do not breed in cavities as a separate group (e.g., there**  
47 **are relatively few forest specialists in the Nearctic that are not also cavity-nesters).**

48  
49 **Another reason is that we aimed to know whether excavators make useful indicators and**  
50 **management surrogates. For this we wanted to know how indicative excavators are of larger and**  
51 **more inclusive suites of forest-associated birds, not of very specific subgroups (e.g., forest-associated**  
52 **species that do not breed in cavities and that do not exclusively use forest habitat).**

53  
54  
55 What about the other two bird groups?

56  
57  
58  
59  
60

1  
2  
3 **RESPONSE: We have altered this text to make clear we predict that spatial variation in forest**  
4 **characteristics, management regimes, and bird communities will lead to differences in relationships**  
5 **between excavators and forest birds.**  
6

- 7
- 8 • I suggest to deeply restructure the introduction: 1) a first paragraph that talks in general about  
9 the relationship of excavators with other birds (fusion of the first two paragraphs); 2) Exclusive  
10 paragraphs for each excavator relationship with each of the other 3 groups of birds. In each  
11 paragraph express what is known and what is the relationship predicted by the authors, and  
12 how they think that these relationships may vary in relation to the biogeographic regions  
13 considered. Another option is that the geographical variations of the relationships are expressed  
14 together in a separate paragraph. On the other hand, I think that it must necessarily be  
15 emphasized and made clear, what is the novelty provided by this study, in comparison with  
16 other studies cited in the same introduction and that address comparisons very similar to those  
17 of this study (eg Drever et al. 2008, Mikusinski et al 2001, Virkkala 2006).  
18  
19

20 **RESPONSE: We thank both Reviewer 1 and 2 for this suggestion for restructuring, and have adopted**  
21 **these suggestions. We have given more attention to the novelty of our study in the very first**  
22 **paragraph of our new version (Larger scale, testing for general patterns across all major biogeographic**  
23 **areas), and have further regrouped and organized the paragraphs in the introduction.**  
24  
25

- 26 • I find necessary to clearly define the categories of bird groups you use. I tried to do this by copy-  
27 and-paste some information you wrote below. However, I don't know if I did it correct, and the  
28 definition of 'excavator' group is missing. Please, check it and correct it. Yet, something is not  
29 clear to me, Can a given bird species be part of more than one group? If the answer is yes, how  
30 that influences on results?  
31

32 **RESPONSE: We have added some text to clarify this in the methods and provided clear definitions of**  
33 **all bird groups used (see also our response to an earlier query above.**  
34  
35

- 36 • I find necessary to clarify some 'ecological' issues (i.e. not statistical) in methods. 1) Did you  
37 include the whole area of each biogeographic zone? or 2) only the forest areas in each one of  
38 them? If (1): How do you think the different amount of area/forest area of each biogeographic  
39 zone can influence your results? How non-forest excavators (as some woodpeckers) can  
40 influence your results? or did you exclude them? Another question: given the consideration of  
41 Palearctic and Oriental regions, what does the AUSTRALASIA region includes? what part of Asia?  
42  
43

44 **RESPONSE: We thank the reviewer for this question. We have added text to explain this in the**  
45 **Methods: "We did not restrict our analyses to forested regions, wanting to avoid making subjective**  
46 **decisions on the classification of a grid cell to a specific vegetation/habitat type. Yet, to make sure we**  
47 **did look for possible relationships between these forest-associated species in regions they actually**  
48 **occur, we did remove cells with zero excavators/woodpeckers and cells where the numbers of**  
49 **secondary cavity-nesters, forest specialists, or all forest birds were lower than that of**  
50 **excavators/woodpeckers from further analyses. "**  
51

52  
53 **That said, we are not sure how the amount of area/forest area would influence our results, but we**  
54 **have aimed to circumvent that issue as much as possible by randomly selecting (1000 times) 1000 grid**  
55  
56  
57  
58  
59  
60

1  
2  
3 cells per region, thereby comparing similar surface (though not necessarily forest, but see above)  
4 areas per region.  
5

6 **Australasia encompasses the following regions, following our adaptation of the classification of van**  
7 **der Hoek et al. 2017. Diversity and Distributions, which is in turn based on that of the Handbook of**  
8 **the Birds of the World (Del Hoyo et al.): American Samoa, Australia, Bismarck Archipelago, Admiralty**  
9 **Islands, Cook Islands, Easter Island, Federated States Micronesia, Fiji, French Polynesia, Guam and the**  
10 **Marianas, Johnston Island, Kiribati, Macquarie Island, Marshall Islands, Nauru, New Caledonia, New**  
11 **Guinea, New Zealand, Niue, Norfolk Island, Papua New Guinea, Pitcairn Islands, Samoa, Solomon**  
12 **Archipelago, Tokelau, Tonga, Tuvalu, Vanuatu, Wake Island, Wallis and Futuna. Practically, we can say**  
13 **that most excavators in this region are from (Papua) New Guinea and surrounding islands.**  
14  
15

- 16  
17  
18
- 19 • What did you specifically model? which were the variables?

20 **RESPONSE: The gls models are more clearly explained now: “ This implied the use of gls models with**  
21 **excavator richness as a predictor variable, the richness of one of the categories of forest-associated**  
22 **birds as a response variable, and a variable exponential spatial covariance structure...”**  
23

- 24
- 25 • I am not an specialist in this kind of analyses, and I could not fully understand it. Given that  
26 many readers of this kind of papers are not specialists either, I find very important to better  
27 explain this methodological part. What are the predicted and what the observed data? What  
28 does tell us the regression slopes and what the mean spearman rho? Nevertheless, at this point,  
29 I have the impression that you modeled the richness of non-excavators and forest birds, relative  
30 the presence of excavators (explanatory variable), i.e. in a causal manner (= gls models).  
31 However, in the introduction this relationship was mostly raised in a correlational manner, this  
32 is, that both excavators and the other forest bird groups show similar responses to forest  
33 structure and disturbances. Exceptions to this correlational relationship are, for example, the  
34 FEW cases (in terms of global areas) in which excavators are essential for nonexcavators by  
35 providing new cavities or food resources (sap and insects in excavator perforations). In short,  
36 you are analysing a relationship that you mostly posted as correlational, with regression models.  
37 Please, if my reasoning is incorrect, just ignore it, but explain better the methodology.  
38  
39  
40

41 **RESPONSE: We have added some clarification (see e.g., the answer above) that may help understand**  
42 **these methods better.**  
43

44 **That said, it is correct that a gls model is basically an ordinary linear regression model with some**  
45 **different assumptions (or some assumptions not met; in this case related to spatial autocorrelation).**  
46 **However, whereas the reasoning behind a correlation vs. a regression differ, the statistics are, in this**  
47 **particular case, the same. A correlation can indeed encompass any relationship between two**  
48 **variables, without assuming cause and effect, whereas a linear regression can only be that: a linear**  
49 **relationship where we assume that X predicts Y. When the correlation is linear though, this becomes**  
50 **one and the same in terms of output (though not interpretation, which we therefore have been**  
51 **careful with, see our Discussion). In other words, when in this particular case both tests address the**  
52 **‘null hypothesis that the two variables are not linearly related. If run on the same data, a correlation**  
53  
54  
55  
56  
57  
58  
59  
60

test and slope test provide the same test statistic and p-value.' (see e.g., <http://sites.utexas.edu/sos/guided/inferential/numeric/bivariate/cor/>).

So why then this regression and not a correlation, if they provide the same outcome but correlations are easier to interpret? Largely because we would be unable to incorporate a measure to address spatial autocorrelation into a correlation test.

- given that in Fig. 1 you detailed ellipses for each of the six zoogeographic region. I'd say that you can leave only the figure 2 and nothing would be lost

**RESPONSE:** We have followed this suggestion and removed the first of the two figures, leaving only the multi-paneled one. That said, we opted to add one map that shows global distributions of excavators relative to secondary cavity-nesters, a map which we deem to be illustrative of the spatial variation and clustering (e.g., between zoogeographic regions) that we discuss in our manuscript.

- It seems like sometimes your reasoning is associative/correlative (e.g. both excavators and other groups of forest birds have similar responses to disturbances), other times it is explanatory (e.g. the excavator richness determines the richness of other non excavator cavity-users by providing new cavities), and here it is predictive: the addition of 1 excavator species implies the addition of X forest bird species, ignoring any other type of causes, such as phylogenetic, biogeographical, etc. You must decide which of these visions you are going to explore, or clearly establish that all of them will be analysed, with their respective methodologies and theoretical support.

**RESPONSE:** Although regressions provide both explanatory and predictive outcomes we understand that our language here is confusing, and our statements may be misinterpreted as meaning one can simply predict from a given number of excavators how many other forest birds there are at that location (which is, of course, not that simple as you rightly point out). Yet, whether the tested relationships are associative (similar habitat needs etc.) or causative (birds use the cavities created by excavators), the fact of the matter is that they are linear. But, in some regions, this relationship is stronger than in others. We should have focused on this and not the steepness of the slopes; and we have therefore removed these parts from the Results and Discussion sections.

That said, we explore whether there are relationships between excavators and other forest birds (the GLS models themselves), but also aimed to see if this could then be used to determine to what extent excavator richness is indicative of that of other species (the matching with the test data set and derivation of Spearman rho's). We hope that this approach is clearer from our revised manuscript.

- Commented [MOU25]: What exactly does the Rho (=strength) mean in this context? low values of Rho mean that the relationships are not very reliable? for example in australasian region. And more important, what would be the joint interpretation of the slopes, the percentage of models with p greater than 0.5 and the rho?

**RESPONSE:** Rho would here give us an idea how 'perfect' the linear relationships are (with rho = 1 being perfect with all grid cells falling on one line), whereas the slope (which we now removed from further discussion (see above) but present in the Results section to be complete in our presentation of model statistics) would tell us how many other forest birds (other than excavators) there are likely to be in a given location (grid cell) relative to the number of excavators (this does thus present an idea of



1  
2  
3 **'what richness' a certain number of excavators would possibly indicate). The % of models with a  $p < 0.05$  gives us an idea whether these relationships are significant or not, given we had to iterate over**  
4 **many (1000) models, this would be a measure of reliability of the relationships given the combination**  
5 **of both the correlation coefficient and the sample size (which here is always 1000).**  
6  
7

8 **Low values of rho do not necessarily mean that that the relationships are not very reliable, but rather**  
9 **that they would not be strong enough to be able to 'use richness of excavators' to predict how many**  
10 **other forest birds are in a given location (here grid cell). Thus low values of rho would, in this case,**  
11 **show that excavators are rather poor indicators of other forest birds, even though the relationships**  
12 **might be real and significant.**  
13  
14

- 15 • Commented [MOU27]: I would like to read what are those differences to take into account from  
16 a practical point of view and Commented [MOU28]: The comment on nest-webs here, in the  
17 first paragraph of Discussion, is out of context. Besides, variation among nestwebs... in relation  
18 to what? Are you trying to relate the association of excavators and other forest birds with  
19 variations in nestweb characteristics? it's far from clear, and you are leaving out a key aspect:  
20 the diversity, persistence and characteristics of trees with cavities  
21  
22

23 **RESPONSE: We have made some substantial changes to our text and hope to now provide a clearer**  
24 **line of argumentation.**  
25

- 26 • However, in several other nestwebs (for example in South America [Cockle et al. 2012, Ruggera  
27 et al. 2016] and India [Manikandan & Balasubramanian 2018]), most non excavator birds mainly  
28 use decay-formed cavities in living trees. Only 10-25% of interactions (including excavator  
29 interactions) are made with snags. So, the evidence to date (even in the Neotropics, where your  
30 results showed the strongest association between excavators and non-excavators), would not  
31 be explained by the number of snags or the amount of woodpecker-excavated cavities. Also,  
32 you need to better explain why forest specialist birds would benefit from the presence of  
33 'certain levels (how much?) of availability of decaying and dead wood'  
34  
35  
36

37 **RESPONSE: We have made substantial changes to the text in the Discussion, incorporating suggestions**  
38 **by both reviewers, which means that we now provide a clearer insight in the differences in the**  
39 **importance of decay vs. excavated cavities in the different regions. With that, we anticipate to have**  
40 **resolved these issues as well.**  
41

- 42 • differences in relation to what of the nestwebs? you need to be more specific. You need to  
43 better explain this: how speciation and other macro-scale processes across the globe influence  
44 on the results you found. Explanations generally are biased to nestwebs. However, you have  
45 other bird groups that not necessarily are cavity-nesters. Also, you don't necessarily have to  
46 invoke networks (of which there are relatively few reports worldwide) to talk about  
47 cavitynesters (of which there are comparatively many more reports around the world)  
48  
49

50 **RESPONSE: We thank the reviewer for this comment. We have made substantial changes to our text,**  
51 **reflecting better that both direct facilitation through nest-webs and indirect associations play a role in**  
52 **shaping the observed relationships. As a result of these changes, we have also paid more attention to**  
53 **the role of differences in community composition etc. in shaping these relationships.**  
54  
55  
56  
57  
58  
59  
60

- Australasia region doesn't lack Piciformes. As you say a few words later, SE Asia has a high diversity of Piciformes. So, be careful when you explain Australasia results as a unique region (see comment also about AUSTRALASIA in methods). In fact, I would like to find a better explanation of the results of the Australasian region, since it had the most contrasting results with the rest of the regions.

**RESPONSE: There is a difference between the Oriental and Australasian zoogeographic regions that may have gone unnoticed to the reviewer. Most of Indonesia and other SE Asian countries falls within the Oriental region, with the Wallace line separating this region from the Australasian region (e.g., Papua/New Guinea) where some excavators exist but Piciformes are notably absent (see also e.g., Mikusiński, G. (2006, January). Woodpeckers: distribution, conservation, and research in a global perspective. In *Annales Zoologici Fennici* (pp. 86-95). Finnish Zoological and Botanical Publishing Board.). That said, we do agree that the results we found for the Australasian region deserved more attention, and have thus extended on this in the text.**

- what differences? you have not established what are the differences along the neotropical region in terms of climatic variables, tree species composition, tree availability and their formation agents. Also, include in this comparison the work by Ruggera et al. 2016, how their results fit in the explanation your trying to develop?

**RESPONSE: In our revised version you will find references to Ruggera et al. as well as more comprehensive explanation of the differences found across and within regions.**

- then, if non-excavators do not 'need' excavators as cavity-forming agents, why did they show the greatest association in richness in the Neotropics?

**RESPONSE: We anticipate that we have now explained this better, focusing on the fact that indirect associations (shared forest elements etc.) are more important than direct facilitation (cavities) in explaining these relationships.**

- Commented [MOU40]: Altamirano et al. 2017 wrote: 'Among SCNs, ten species (40%) were obligate and 15 (60%) were non obligate cavity nesters. Non obligate cavity nesters included six (24%) facultative, five (20%) marginal, and four (16%) incidental SCN'. If we include also PCN, facultative cavity nesters are 20%. Commented [MOU41]: how are they influenced? Again, I lost the point. You began talking about 'spatial variation in the relationships between excavators and other forest birds within zoogeographic regions', but then you focused (again) only on excavators and non-excavators, especially in the Neotropics.

**RESPONSE: We have changed these parts of text substantially, hopefully addressing these issues and providing more clarity.**

- I believe that this is a central point, that it should be better developed in the introduction, and that the methodology should be chosen according to that. It is not the same to analyze something in a correlative way, that in an explanatory or predictive way

**RESPONSE: Yes, we agree. We have made an effort to provide more attention to these two different mechanisms (direct facilitation and indirect association) by which relationships between excavators and other forest birds may be formed.**

1  
2  
3  
4  
5  
6  
7  
8  
9  
10  
11  
12  
13  
14  
15  
16  
17  
18  
19  
20  
21  
22  
23  
24  
25  
26  
27  
28  
29  
30  
31  
32  
33  
34  
35  
36  
37  
38  
39  
40  
41  
42  
43  
44  
45  
46  
47  
48  
49  
50  
51  
52  
53  
54  
55  
56  
57  
58  
59  
60

## Appendix D

We thank the Editor and reviewers for the chance to submit a revised version of our manuscript, and for the many constructive comments we received. As per request from the editor and reviewers, we have redone some analyses (specifically we now present non-overlapping 'response groups' of forest birds), use ecological language rather than the statistical aspects of the correlations (slopes etc.), and discuss in more detail the results as they pertain to evidence for the two main drivers of possible relationships between excavators and forest birds.

We provide more detailed responses below, and hope you will find this renewed version sufficiently improved to merit publication.

Ps. We would like to point out that most changes we made can also be found in the track change version of our new manuscript, though the final version without track changes has a few more grammar, writing, and outline changes and should thus be considered as the final version.

Response to the reviewers are preceded by an \*

- 1) work on the predictions, making them more precise, with more ecological language, and that revolve around the two main causes that the authors propose as the main drivers determining the relationships of excavators and forest birds: the sharing of habitat requirements, and the provision of excavated cavities. How these causes spatially vary based on geographic, climatic and historical characteristics in each region, will determine the predictions that will be tested.

\*We thank the reviewer for the comments and have made substantial changes to the Introduction (especially the prediction part). We have reduced our attention to secondary topics, such the analyses of the relationships that include woodpeckers (which are now in supplementary materials) and statistical elements (such as the steepness of slopes), and instead focus more on the two drivers mentioned in this comment. Where possible, we aimed to also strengthen our discussion of differences across regions, though we are admittedly limited in our knowledge of the more tropical regions (e.g., the Afrotropics), for which there is but little relevant literature available.

- 2) rethink the overlapping of the bird categories, assessing which is the best option to determine which of the aforementioned factors (i.e. sharing of habitat requirements and cavity provisions), are the most likely drivers of the proposed relationships. As I comment in the text, the definition of the categories is inconsistent with the methodology used. And, if I understood well the methodology, I also have the impression that the overlapping of categories used may be influencing the results, inflating the relationships between excavators and forest birds, since in this last category are also included many SCNs and forest specialists. I have seen your response to a related comment I made in the previous version. I guess that a good possibility is that the only categories that overlap are 2 (SCN) and 3 (forest specialists). That way, you can see relationships that supposedly may be due more exclusively to provision of cavities (relationships of excavator with 2 would be stronger than with 3), or more related to sharing habitat requirements (relationships of excavator with 3 would be stronger than with 2). Also, leaving category 4 without overlapping can lead to different results and interpretations I think could be more interesting.

\*We agree that this decision, to use nested categories, might limit our ability to separate relationships that are more shaped by the provision of cavities from those relationships that rely solely on mutually shared preferences for certain habitat elements etc. We therefore opted to re-run all the analyses for groups that do not have any overlaps. For example, in this revised manuscript version, the group of forest specialists does not include any secondary cavity-nesters, etc.

The results of these new analyses are largely in line with those we obtained previously, but there are some changes that we have more extensively discussed in Results and Discussion. Notably though, the relationships between excavators and forest birds that do not nest in cavities are now particularly strong (in most cases, stronger than those between excavators and secondary cavity-nesters). In other words, we [still] see that excavators are mainly indicators of other birds probably due to their mutual association with habitat elements etc., rather than the provision of cavities.

3) The discussion needs a lot of work. I would suggest that you focus on the differences between the zoogeographic regions, which is the main objective of the paper and what has been evaluated. The differences that may exist within each region should be minimized to the maximum, and only mentioned when strictly necessary. The discussion still has a great bias to try to explain the relationships between excavators and SCN, and there is a considerably smaller space in trying to explain the relationships with forest birds that do not nest in cavities. Finally, relationships in the Australasia region, which showed a different pattern from the rest (even in sign), were not explained, and these results are practically ignored when proposed, from the title, and the first and last paragraph of the discussion, that relationships are common to all zoogeographic regions.

\*We did a major rewrite of the discussion to reflect our revised strong and consistent results. We agree that the differences between the zoogeographic regions are important, though we personally think another topic is the main objective of this paper: that excavators can be indicators of other birds at global scales. Yet, we see that we need to minimize our attention to within regions variation, and have done so, and understand that we need to emphasize how the Australasian region differs from others (and attempt to explain why). To that end, and as per your request, we removed some of the analyses that concern Australasia, notably those on woodpeckers which are not found in the region (but which we erroneously, and inaccurately, included in some of the tables and text).

Overall, we re-worked the Discussion, also taking into account the comments below and in the PDF, to provide a simpler but clearer story.

Many other comments have been made in the attached file

Reviewer: 1

Comments to the Author(s)

Line 130: add a bracket at the end of the sentence

\*done

Lines 164-187: I opt for a very short explanation what do you mean by "universal" used in the title of the paper already here.

\*We have removed the word 'universal' from the title following other reviewer comments, but have nevertheless added some text in this paragraph to illustrate that we expect these relationships to be of similar nature across the world.

Lines 268-277: In contrast with added information about not analysing woodpeckers in Australasia (lines 236-238), you report it here and in Table 2. It is confusing to me.

\*This text has been altered, and there is no reporting of results for Australia left in this part of the manuscript.

Line 293: I have a hard time finding the paper by Tikkanen et al. 2006 as supporting your claim here. Possibly cite several paper based on single-species woodpecker studies or use some of those:

JM Roberge, P Angelstam, MA Villard. 2008. Specialised woodpeckers and naturalness in hemiboreal forests—deriving quantitative targets for conservation planning. *Biological conservation*, 2008

or

Angelstam, P., & Mikusiński, G. 1994: Woodpecker assemblages in natural and managed boreal and hemiboreal forest - a review. *Annales Zoologici Fennici* 31: 157-172.

\*We think the suggestions are very valid references here, but we think Tikkanen et al. 2006's reference is a perfect fit here, and is actually very easy to find (Google 'Red-listed boreal forest species of Finland: associations with forest structure, tree species, and decaying wood. ' provides it right away). That said, we do see that especially Roberge and Angelstam would be a good fit here as well, and have included that reference accordingly.

Lines 392-394: I suggest adding further argument here i.e. that woodpeckers are highly responsive to playbacks (both calls and particularly drumming) that, if applied in right season are very effective survey tool and cover relatively large areas. See e.g. Kumar, R. and Singh, P. (2010), Determining woodpecker diversity in the sub-Himalayan forests of northern India using call playbacks. *Journal of Field Ornithology*, 81: 215-222. doi:10.1111/j.1557-9263.2009.00267.x or Jeremy A. Baumgardt, Joel D. Sauder, and Kerry L. Nicholson (2014) Occupancy Modeling of Woodpeckers: Maximizing Detections for Multiple Species With Multiple Spatial Scales. *Journal of Fish and Wildlife Management*: December 2014, Vol. 5, No. 2, pp. 198-207.

\*We again thank the reviewer for this valuable recommendation. We have added such text at this point as well as the Baumgardt et al. 2014 reference.

Table 2: remove data concerning the woodpeckers (see my comment above)

\*We have changed Table 2 to be a new supplementary table (Table S2).

There is one important paper dealing with woodpeckers at the global scale that is relevant to your study but omitted namely: Vergara-Tabares, D. L., M.Lammertink, E. G.Verga, A.Schaaf, and J.Nori (2018). Gone with the forest: Assessing global woodpecker conservation from land use patterns. *Diversity and Distributions* 24:640–651.

Please consider mentioning the results of this paper in the Introduction or Discussion. It is particularly interesting from the management perspective and the human influence on forest qualities.

\*We were aware of this paper but previously did not see a particular text location where this reference would fit well. But, in this revised version, we found that this reference fits very well in the Discussion and strengthens our story.

\*A few specific responses to comments made to the PDF (other changes can be found in the document version with track changes):

- After reading your response to my comment on the title, I must kindly say that I still disagree with the use of the word 'universal'. First, because the meaning of the word itself is more a synonym for global, than what you want to express; and second, because what you found is not universal (in the sense that you want to give it), the Australasia region does not have the same relationships, either in strength or in sign, as the other regions.

\*We have removed the word universal from the title following this recommendation.

- Even when I understand your point here, when you say 'natural', in my opinion this is a long-standing misuse of the word. Bird-excavated cavities are also 'natural'. I suggest changing those terms, maybe write directly 'fungal formation'?

\*We agree with this observation and have altered the text to say 'fungal formation'.

- I don't see a clear and direct link between the first two sentences of the paragraph. Moreover, as I mentioned in the previous version, nest-webs involve only one of the subsets of birds that you are trying to associate with excavators. I suggest deleting the first sentence, and slightly modifying the second to be the beginning of the paragraph

\*We have made considerable changes in the text in this section.

- Taking into account these arguments, how do you explain that in the Neotropical region, where the relationship between excavators and SCN found is the strongest association between excavators and SCN in the world, SCN do not rely heavily on excavated cavities?

\*We refocused on the relatively more important role of indirect association, rather than direct facilitation, in shaping the relationships between excavators and other forest birds. As a result, we largely changed the text in the Discussion, including providing explanations related to the relative 'natural state' of forests in the Neotropics as compared to other regions, the larger number of niches available in the Neotropics, etc. We kindly refer to the altered Discussion for all details.

**Appendix E****ROYAL SOCIETY  
OPEN SCIENCE****Global relationships between tree-cavity excavators and  
forest bird richness**

|                               |                                                                                                                                                                                                                                                                        |
|-------------------------------|------------------------------------------------------------------------------------------------------------------------------------------------------------------------------------------------------------------------------------------------------------------------|
| Journal:                      | <i>Royal Society Open Science</i>                                                                                                                                                                                                                                      |
| Manuscript ID                 | RSOS-192177.R1                                                                                                                                                                                                                                                         |
| Article Type:                 | Research                                                                                                                                                                                                                                                               |
| Date Submitted by the Author: | 31-Jan-2020                                                                                                                                                                                                                                                            |
| Complete List of Authors:     | van der Hoek, Yntze; The Dian Fossey Gorilla Fund International, Karisoke Research Center<br>Gaona, Gabriel; Justus Liebig Universität Giessen Graduiertenzentrum Ciach, Michal; University of Agriculture in Krakow<br>Martin, Kathy; University of British Columbia, |
| Subject:                      | ecology < BIOLOGY                                                                                                                                                                                                                                                      |
| Keywords:                     | Facilitator species, Indicator species, Species interactions, Picidae, Management surrogates, Secondary cavity-nesting birds                                                                                                                                           |
| Subject Category:             | Ecology, Conservation, and Global Change Biology                                                                                                                                                                                                                       |
|                               |                                                                                                                                                                                                                                                                        |

SCHOLARONE™  
Manuscripts



**Author-supplied statements**

Relevant information will appear here if provided.

***Ethics***

*Does your article include research that required ethical approval or permits?:*

This article does not present research with ethical considerations

*Statement (if applicable):*

CUST\_IF\_YES\_ETHICS :No data available.

***Data***

*It is a condition of publication that data, code and materials supporting your paper are made publicly available. Does your paper present new data?:*

Yes

*Statement (if applicable):*

Links to the data and R scripts to reproduce analyses presented in Global and universal relationships between tree-cavity excavators and forest bird richness can be found in Appendix S1.

***Conflict of interest***

I/We declare we have no competing interests

*Statement (if applicable):*

CUST\_STATE\_CONFLICT :No data available.

***Authors' contributions***

This paper has multiple authors and our individual contributions were as below

*Statement (if applicable):*

YH and GVG carried out the data analysis, and led the design of the study and writing of the manuscript; MC and KM critically revised the manuscript. All authors contribute to the writing of the final manuscript, gave final approval for publication and agree to be held accountable for the work performed therein.

1  
2  
3 We thank the Editor and reviewers for the chance to submit a revised version of our manuscript,  
4 and for the many constructive comments we received. As per request from the editor and  
5 reviewers, we have redone some analyses (specifically we now present non-overlapping  
6 'response groups' of forest birds), use ecological language rather than the statistical aspects of  
7 the correlations (slopes etc.), and discuss in more detail the results as they pertain to evidence  
8 for the two main drivers of possible relationships between excavators and forest birds.  
9

10 We provide more detailed responses below, and hope you will find this renewed version  
11 sufficiently improved to merit publication.  
12

13 Ps. We would like to point out that most changes we made can also be found in the track  
14 change version of our new manuscript, though the final version without track changes has a few  
15 more grammar, writing, and outline changes and should thus be considered as the final version.  
16  
17  
18

19 Response to the reviewers are preceded by an \*  
20

- 21 1) work on the predictions, making them more precise, with more ecological language, and  
22 that revolve around the two main causes that the authors propose as the main drivers  
23 determining the relationships of excavators and forest birds: the sharing of habitat  
24 requirements, and the provision of excavated cavities. How these causes spatially vary  
25 based on geographic, climatic and historical characteristics in each region, will  
26 determine the predictions that will be tested.  
27  
28

29 \*We thank the reviewer for the comments and have made substantial changes to the  
30 Introduction (especially the prediction part). We have reduced our attention to secondary  
31 topics, such the analyses of the relationships that include woodpeckers (which are now  
32 in supplementary materials) and statistical elements (such as the steepness of slopes),  
33 and instead focus more on the two drivers mentioned in this comment. Where possible,  
34 we aimed to also strengthen our discussion of differences across regions, though we are  
35 admittedly limited in our knowledge of the more tropical regions (e.g., the Afrotropics),  
36 for which there is but little relevant literature available.  
37  
38

- 39 2) rethink the overlapping of the bird categories, assessing which is the best option to  
40 determine which of the aforementioned factors (i.e. sharing of habitat requirements and  
41 cavity provisions), are the most likely drivers of the proposed relationships. As I  
42 comment in the text, the definition of the categories is inconsistent with the methodology  
43 used. And, if I understood well the methodology, I also have the impression that the  
44 overlapping of categories used may be influencing the results, inflating the relationships  
45 between excavators and forest birds, since in this last category are also included many  
46 SCNs and forest specialists. I have seen your response to a related comment I made in  
47 the previous version. I guess that a good possibility is that the only categories that  
48 overlap are 2 (SCN) and 3 (forest specialists). That way, you can see relationships that  
49 supposedly may be due more exclusively to provision of cavities (relationships of  
50 excavator with 2 would be stronger than with 3), or more related to sharing habitat  
51 requirements (relationships of excavator with 3 would be stronger than with 2). Also,  
52 leaving category 4 without overlapping can lead to different results and interpretations I  
53 think could be more interesting.  
54  
55  
56  
57  
58  
59  
60

1  
2  
3 \*We agree that this decision, to use nested categories, might limit our ability to separate  
4 relationships that are more shaped by the provision of cavities from those relationships that  
5 rely solely on mutually shared preferences for certain habitat elements etc. We therefore  
6 opted to re-run all the analyses for groups that do not have any overlaps. For example, in  
7 this revised manuscript version, the group of forest specialists does not include any  
8 secondary cavity-nesters, etc.  
9

10 The results of these new analyses are largely in line with those we obtained previously, but  
11 there are some changes that we have more extensively discussed in Results and  
12 Discussion. Notably though, the relationships between excavators and forest birds that do  
13 not nest in cavities are now particularly strong (in most cases, stronger than those between  
14 excavators and secondary cavity-nesters). In other words, we [still] see that excavators are  
15 mainly indicators of other birds probably due to their mutual association with habitat  
16 elements etc., rather than the provision of cavities.  
17  
18  
19  
20

21  
22 3) The discussion needs a lot of work. I would suggest that you focus on the differences  
23 between the zoogeographic regions, which is the main objective of the paper and what has  
24 been evaluated. The differences that may exist within each region should be minimized to  
25 the maximum, and only mentioned when strictly necessary. The discussion still has a great  
26 bias to try to explain the relationships between excavators and SCN, and there is a  
27 considerably smaller space in trying to explain the relationships with forest birds that do not  
28 nest in cavities. Finally, relationships in the Australasia region, which showed a different  
29 pattern from the rest (even in sign), were not explained, and these results are practically  
30 ignored when proposed, from the title, and the first and last paragraph of the discussion, that  
31 relationships are common to all zoogeographic regions.  
32

33 \*We did a major rewrite of the discussion to reflect our revised strong and consistent results.  
34 We agree that the differences between the zoogeographic regions are important, though we  
35 personally think another topic is the main objective of this paper: that excavators can be  
36 indicators of other birds at global scales. Yet, we see that we need to minimize our attention  
37 to within regions variation, and have done so, and understand that we need to emphasize  
38 how the Australasian region differs from others (and attempt to explain why). To that end,  
39 and as per your request, we removed some of the analyses that concern Australasia,  
40 notably those on woodpeckers which are not found in the region (but which we erroneously,  
41 and inaccurately, included in some of the tables and text).  
42  
43

44 Overall, we re-worked the Discussion, also taking into account the comments below and in  
45 the PDF, to provide a simpler but clearer story.  
46

47  
48 Many other comments have been made in the attached file  
49

50 Reviewer: 1  
51

52 Comments to the Author(s)  
53

54 Line 130: add a bracket at the end of the sentence  
55  
56  
57  
58  
59  
60

1  
2  
3 \*done  
4

5 Lines 164-187: I opt for a very short explanation what do you mean by "universal" used in  
6 the title of the paper already here.  
7

8 \*We have removed the word 'universal' from the title following other reviewer comments, but  
9 have nevertheless added some text in this paragraph to illustrate that we expect these  
10 relationships to be of similar nature across the world.  
11

12  
13 Lines 268-277: In contrast with added information about not analysing woodpeckers in  
14 Australasia (lines 236-238), you report it here and in Table 2. It is confusing to me.  
15

16 \*This text has been altered, and there is no reporting of results for Australia left in this part of  
17 the manuscript.  
18

19 Line 293: I have a hard time finding the paper by Tikkanen et al. 2006 as supporting your  
20 claim here. Possibly cite several paper based on single-species woodpecker studies or use  
21 some of those:  
22

23 JM Roberge, P Angelstam, MA Villard. 2008. Specialised woodpeckers and naturalness in  
24 hemiboreal forests—deriving quantitative targets for conservation planning. *Biological*  
25 *conservation*, 2008  
26

27 or

28 Angelstam, P., & Mikusiński, G. 1994: Woodpecker assemblages in natural and managed  
29 boreal and hemiboreal forest - a review. *Annales Zoologici Fennici* 31: 157-172.  
30

31 \*We think the suggestions are very valid references here, but we think Tikkanen et al.  
32 2006's reference is a perfect fit here, and is actually very easy to find (Google 'Red-listed  
33 boreal forest species of Finland: associations with forest structure, tree species, and decaying wood.  
34 ' provides it right away). That said, we do see that especially Roberge and Angelstam would be a  
35 good fit here as well, and have included that reference accordingly.  
36  
37  
38

39 Lines 392-394: I suggest adding further argument here i.e. that woodpeckers are highly  
40 responsive to playbacks (both calls and particularly drumming) that, if applied in right  
41 season are very effective survey tool and cover relatively large areas. See e.g. Kumar, R.  
42 and Singh, P. (2010), Determining woodpecker diversity in the sub-Himalayan forests of  
43 northern India using call playbacks. *Journal of Field Ornithology*, 81: 215-222.  
44 doi:10.1111/j.1557-9263.2009.00267.x or Jeremy A. Baumgardt, Joel D. Sauder, and Kerry  
45 L. Nicholson (2014) Occupancy Modeling of Woodpeckers: Maximizing Detections for  
46 Multiple Species With Multiple Spatial Scales. *Journal of Fish and Wildlife Management*:  
47 December 2014, Vol. 5, No. 2, pp. 198-207.  
48  
49

50 \*We again thank the reviewer for this valuable recommendation. We have added such text  
51 at this point as well as the Baumgardt et al. 2014 reference.  
52

53 Table 2: remove data concerning the woodpeckers (see my comment above)  
54  
55  
56  
57  
58  
59  
60

1  
2  
3 \*We have changed Table 2 to be a new supplementary table (Table S2).  
4

5 There is one important paper dealing with woodpeckers at the global scale that is relevant to  
6 your study but omitted namely: Vergara-Tabares, D. L., M.Lammertink, E. G.Verga,  
7 A.Schaaf, and J.Nori (2018). Gone with the forest: Assessing global woodpecker  
8 conservation from land use patterns. Diversity and Distributions 24:640–651.

9 Please consider mentioning the results of this paper in the Introduction or Discussion. It is  
10 particularly interesting from the management perspective and the human influence on forest  
11 qualities.  
12  
13

14 \*We were aware of this paper but previously did not see a particular text location where this reference  
15 would fit well. But, in this revised version, we found that this reference fits very well in the Discussion  
16 and strengthens our story.  
17

18 \*A few specific responses to comments made to the PDF (other changes can be found in the document  
19 version with track changes):  
20

- 21 • After reading your response to my comment on the title, I must kindly say that I still disagree  
22 with the use of the word 'universal'. First, because the meaning of the word itself is more a  
23 synonym for global, than what you want to express; and second, because what you found is not  
24 universal (in the sense that you want to give it), the Australasia region does not have the same  
25 relationships, either in strength or in sign, as the other regions.  
26  
27

28 \*We have removed the word universal from the title following this recommendation.  
29

- 30 • Even when I understand your point here, when you say 'natural', in my opinion this is a long-  
31 standing misuse of the word. Bird-excavated cavities are also 'natural'. I suggest changing those  
32 terms, maybe write directly 'fungal formation'?  
33

34 \*We agree with this observation and have altered the text to say 'fungal formation'.  
35

- 36 • I don't see a clear and direct link between the first two sentences of the paragraph. Moreover,  
37 as I mentioned in the previous version, nest-webs involve only one of the subsets of birds that  
38 you are trying to associate with excavators. I suggest deleting the first sentence, and slightly  
39 modifying the second to be the beginning of the paragraph  
40  
41

42 \*We have made considerable changes in the text in this section.  
43

- 44 • Taking into account these arguments, how do you explain that in the Neotropical region, where  
45 the relationship between excavators and SCN found is the strongest association between  
46 excavators and SCN in the world, SCN do not rely heavily on excavated cavities?  
47

48 \*We refocused on the relatively more important role of indirect association, rather than direct  
49 facilitation, in shaping the relationships between excavators and other forest birds. As a result, we  
50 largely changed the text in the Discussion, including providing explanations related to the relative  
51 'natural state' of forests in the Neotropics as compared to other regions, the larger number of  
52 niches available in the Neotropics, etc. We kindly refer to the altered Discussion for all details.  
53  
54  
55  
56  
57  
58  
59  
60

1  
2  
3 | 1 Title: Global ~~and universal~~ relationships between tree-cavity excavators and forest bird richness

4 2  
5 3 Running title: Excavator and forest bird relationships

6 4  
7 5 Yntze van der Hoek<sup>1,2\*</sup>, Gabriel V. Gaona<sup>1</sup>, Michał Ciach<sup>3</sup> and Kathy Martin<sup>4,5</sup>

8 6  
9 7 <sup>1</sup> Universidad Regional Amazónica Ikiam, Vía Muyuna, Kilómetro 7, Tena, Ecuador.

10 8 <sup>2</sup> The Dian Fossey Gorilla Fund International, Musanze, Rwanda.

11 9 <sup>3</sup> Department of Forest Biodiversity, Institute of Forest Ecology and Silviculture, Faculty of  
12 10 Forestry, University of Agriculture, al. 29 Listopada 46, 31-425 Kraków, Poland.

13 11 <sup>4</sup> Department of Forest and Conservation Sciences, University of British Columbia, 2424 Main  
14 12 Mall, Vancouver, British Columbia V6T 1Z4 Canada.

15 13 <sup>5</sup> Environment and Climate Change Canada, 5421 Robertson Road, R.R. 1, Delta, British  
16 14 Columbia V4K 3N2, Canada.

17 15  
18 16 \*Corresponding author: yntzevanderhoek@gmail.com  
19 17  
20 18  
21 19  
22 20  
23 21  
24 22  
25 23  
26 24  
27 25  
28 26  
29 27  
30 28  
31 29  
32 30  
33 31  
34 32  
35 33  
36 34  
37 35  
38 36  
39 37  
40 38  
41 39  
42 40  
43 41  
44 42  
45 43  
46 44  
47 45  
48 46  
49 47  
50 48  
51 49  
52 50  
53 51  
54 52  
55 53  
56 54  
57 55  
58 56  
59 57  
60 58

**Abstract**

Global monitoring of biodiversity and ecosystem change can be aided by the effective use of indicators. Tree-cavity excavators, the majority of which are woodpeckers (Picidae), are known to be useful indicators of the health or naturalness of forest ecosystems and by the diversity of forest birds. They are indicators of the latter due to their associations with particular forest elements and because of their role in facilitating other species through the provision of nest cavities. Here, we investigated whether these positive correlations between excavators and other forest birds are also found at global scales. We used global distribution maps to extract richness estimates of tree-cavity nesting and forest-associated birds, which we grouped by zoogeographic regions. We then created generalized least squares (gls) models to assess the relationships between these groups of birds. We show that richness of tree-cavity excavating birds correlates positively with that of cavity-nesters and forest birds at global scales, but with variation across zoogeographic regions. As many excavators are relatively easy to detect, play keystone roles at local scales, and are effective management targets, we propose that excavators are useful for biodiversity monitoring across multiple spatial scales and geographic regions, especially in the tropics.

**Keywords**

Facilitator species, Indicator species, Management surrogates, Picidae, Species interactions, Woodpeckers

## 93 Introduction

94 Forests worldwide are facing increasing anthropogenic pressures, with both a rapid decline in the  
95 surface area of natural forests and a decrease in the naturalness of forests as a result [1, 2]. In  
96 turn, these reductions of high-quality forest habitats have led to a loss of forest-associated  
97 biodiversity [3-5]. To monitor these changes in forest ecosystems and their denizens, we often  
98 look at specialized animals that require the availability of specific habitat structures and  
99 processes across long temporal and large spatial scales [6], such as birds that respond not only to  
100 a loss in overall forest cover but also to a change in forest health, quality, and integrity [7-10].  
101 Excavators such as woodpeckers, barbets, nuthatches, trogons and certain parrot species—among  
102 which woodpeckers are the most numerous group [11]—may be especially effective indicators  
103 due to their associations with particular forest elements and their role in facilitating the presence  
104 of other species through the provision of nest cavities. Indeed, there is empirical evidence that  
105 their presence can be indicative of the state of both the forest (e.g., the presence of large trees  
106 [12], heterogeneous forest structure [13], or a high level of naturalness [14-18]) as well as the  
107 richness and abundance of other forest-associated species [19-21]. However, we may question  
108 whether excavators are universally effective indicators, at least of biodiversity, in all geographic  
109 regions or forest types. For example, excavators are better predictors of richness and abundance  
110 of other forest resident birds in deciduous versus coniferous forests of certain parts of hemiboreal  
111 Europe [15].

112 If relationships between excavators and other forest-associated biota are universally  
113 positive in nature, and common not only at stand- and landscape-scales but hold across large  
114 geographic regions, then excavators could form a unique group of indicators that may be  
115 effective across multiple locations and spatial scales [22]. To find species that are effective as  
116 both indicator and management surrogates across multiple regions would be especially useful in  
117 the largely understudied tropics where comprehensive biodiversity assessments are costly and  
118 logistically challenging [23]. The first signs are promising as the overwhelming majority of tree-  
119 cavity excavators are forest or woodland birds and general patterns of woodpecker richness  
120 correlate positively with the amount of forest cover at the global scale [24]. Moreover, many  
121 excavators are regarded as habitat specialists and tend to have highly specific habitat  
122 requirements, ~~requirements~~ which are usually only met in forests with high degrees of  
123 naturalness and low levels of disturbances (e.g., logging). In fact, restoration efforts have  
124 effectively made use of woodpeckers to indicate that restoration has successfully reached a  
125 certain level of naturalness [25, 26]. This group of birds often utilizes large, live or decaying  
126 trees, or coarse woody debris, for nesting, roosting, and feeding, and the availability of dead  
127 wood is in particular found to be important [27-29]. This role of excavators as indicators of the  
128 naturalness of ecosystems, whereby their presence correlates strongly with other aspects of  
129 biodiversity, is enhanced by the fact that the majority of species are forest residents, which  
130 arguably makes them more responsive to local changes in habitat quality (see e.g., [30]).

131 Excavators are not only reliable indicators of other forest birds by means of their mutual  
132 associations with forest characteristics, but correlations between both groups of birds are also  
133 partially determined by species interactions. Taken together, these ‘nest-webs’ [31] of interacting  
134 species are structured by the availability and acquisition of tree-cavities formed by two major  
135 processes: ‘~~funga~~natural formation’, in which fungi decompose wood over an extended period,  
136 or animal excavation [32, 33]. Since most excavators—at least the majority of woodpeckers—  
137 excavate a new nest cavity each year, this mode of cavity creation steadily provides a large  
138 number of potential sheltered roosting and nesting sites ~~available to~~for secondary-users: both for



1  
2  
3 139 vertebrates [33] and invertebrates [34, 35]. As a result, cavity formation by excavation is an  
4 140 important, and often more rapid, -source of nest holes for species in many regions of the world,  
5 141 especially North America [33]. However, decay-formed cavities have shown to beare likely to be  
6 142 more important nest sites in other regions, especially the tropics, and it is very likely that the  
7 143 relative importance of both processes of cavity formation—and thus the strength of the  
8 144 relationship between excavator richness and secondary cavity-nester richness—varies globally  
9 145 [33]. ~~Finally, it is worth noting that excavators play additional roles (beyond the direct provision~~  
10 146 ~~of cavities) that may facilitate other species. For example, as excavators perforate the bark of~~  
11 147 ~~trees they may expose insects or sap for other species to forage on [36, 37].~~ In addition,  
12 148 excavators can aid in the dispersal of fungi, which in turn enhances processes of wood softening  
13 149 and the formation of decay-formed cavities [368]. Finally, it is worth noting that excavators play  
14 150 additional roles (beyond the direct provision of cavities) that may facilitate other species that are  
15 151 not necessarily cavity-nesters. For example, as excavators perforate the bark of trees they may  
16 152 expose insects or sap for other species to forage on [368].

17 153 Local studies of cavity-nesting birds and their interactions are largely biased towards  
18 154 temperate zones, and only a few authors have explored global variation in nest-web  
19 155 characteristics or addressed how such variation should be taken into account when considering  
20 156 cavity-nester communities in forest conservation or management (e.g., [33, 39]). Nevertheless,  
21 157 ~~we might predict that these birds~~Excavators ~~couldare arguably be~~reliable indicators of forest-  
22 158 ~~birdavian~~ diversity and richness ~~not only~~ at stand or landscape-levels [9, 19], ~~but it is unclear if~~  
23 159 ~~this, but also across large regions at a global scale, if not for the cavities that excavators supply~~  
24 160 ~~but for the associations of excavators with forest elements that are indicative of heterogeneous~~  
25 161 ~~forests with a high degree of naturalness. scales up across larger regions or holds across the~~  
26 162 ~~globe given, for example, indications that the interactions between cavity-nesting birds may vary~~  
27 163 ~~spatially (e.g., [11]) or the notion that certain dominant groups of excavators (woodpeckers in~~  
28 164 ~~particular) vary in richness across zoogeographic regions [11].~~ Therefore, the aim of the present  
29 165 study is to investigate whether there are consistent patterns in the relationships between avian  
30 166 tree-cavity excavators (hereafter: excavators) and species richness of non-excavating tree-cavity  
31 167 nesters (hereafter: secondary cavity-nesters), forest specialist species, and forest birds in general,  
32 168 across the globe. If previously observed relationships between cavity-excavators and other forest  
33 169 birds scale up from local forest stands [17] or ecosystems [19] to zoogeographic or global levels,  
34 170 then this strengthens the potential of tree cavity-excavators as both indicators and management  
35 171 surrogates.

36 172 Given the important, and potential indicator, role of excavators in forest ecosystems  
37 173 across the world, we predicted a global tendency for that secondary cavity-nester, forest  
38 174 specialist, forest generalist and overall for bird (specialists + generalists) richness generally  
39 175 witot increase with-in correlation the number of excavators present in the ecosystem, regardless  
40 176 of the ecosystem or location. However, we also predicted that the nature (e.g., the strength and  
41 177 slope of correlations) of the relationships between excavators and richness of other forest birds  
42 178 will vary across zoogeographic regions, reflecting differences in forest characteristics (e.g.,  
43 179 deciduous vs. coniferous forests), forest management practices (e.g., forests being more or less  
44 180 intensively managed), and bird communities (e.g., the relative richness of different groups of  
45 181 forest-associated birds), as previously discussed in e.g., [33]. In particular, we predicted that  
46 182 correlations between excavators and other birdssecondary cavity-nesters ld be particularly  
47 183 strong, but with relatively shallow regression slopes, in regions with relatively high intensities of  
48 184 forest management (vs. unmanaged natural forests) and low overall an diversity and slow

185 processes of decay-related tree-cavity formation. In such regions these predominantly temperate  
 186 and boreal regions, particularly such as the Nearctic and Palearctic, relationships between  
 187 excavators and other forest birds and secondary cavity-nesters would be that are driven by mutual  
 188 associations with particular forest elements but would be enhanced by direct interactions through  
 189 the provision of nest cavities, as a lack of available decay-formed cavities may increase the  
 190 dependence of secondary-cavity nesters on excavated cavities. We predicted relatively shallow  
 191 regression slopes in these regions (Nearctic, Palearctic), as there is a relatively low ratio between  
 192 the numbers of excavators and secondary cavity-nesters [11]. In contrast, for regions that  
 193 largely span the tropics, such as the Neotropics, Afrotropics, and Oriental regions, we also  
 194 predicted predict weaker, though still positive, correlations between excavators and secondary  
 195 cavity-nesters other forest birds, but as these relationships would be driven mainly by mutual  
 196 associations with particular forest elements and less by direct interactions through the provision  
 197 of nest cavities—decay-formed cavities being more prevalent here. As a result, we also predict  
 198 that relationships between excavators and secondary cavity-nesters stronger than those  
 199 between excavators and non-cavity-nesting forest birds (specialists or generalists) in the Nearctic  
 200 and Palearctic, but that there is no such clear pattern in of differences in strength of correlations  
 201 for the tropical regions. For Australasia, where the largest group of excavators (woodpeckers) is  
 202 notably absent, we predict relationships between the present excavators, often weaker excavators  
 203 that require softer or rotting wood (see [11] for species), and other groups of birds to be  
 204 relatively weak and to be solely based on certain shared habitat preferences. Finally, for all  
 205 regions, we predict that relationships between excavators and secondary cavity-nesters and  
 206 between excavators and forest specialists stronger than those between excavators and forest  
 207 generalists, as the latter group includes species that are unlikely to have either direct interactions  
 208 or mutually shared habitat preferences with excavators. In fact, many generalist forest birds may  
 209 have traits (e.g., ground-nesting behaviour and a preference for early-successional forests with  
 210 small trees) that can lead to habitat requirements opposite from those required by  
 211 excavators—we predicted these correlations to be weaker. However, as these regions are  
 212 more diverse, we also predicted that there would be relatively higher numbers of forest birds per  
 213 excavator, resulting in steeper regression slopes.

## 214 **Material and Methods**

215 We used published global distribution maps of tree-cavity nesting birds [11] and forest birds  
 216 [410] to extract richness estimates per 10×10 km grid cell (Table 1). Maps for both tree-cavity  
 217 nesters and forest birds were based on the same species range maps provided by BirdLife  
 218 International and NatureServe [421]. We selected and classified focal bird species following [11,  
 219 410] as 1) excavators (species that are known to often or always excavate their own nesting  
 220 cavities), 2) secondary cavity-nesters: birds which are known to nest in tree cavity but which  
 221 never or rarely excavate their own cavity, 3) forest specialists: birds that exclusively use forest  
 222 habitat, and 4) for birds: birds that use forest habitat but also at least one other type of habitat.  
 223 We note that some species were counted in more than one category (e.g., a species that is a  
 224 ‘forest specialist’ is per definition also counted as a ‘forest bird’). However, excavators were  
 225 never counted in any other category.

226 We used only range polygons where a species’ presence was classified as ‘Extant’ or  
 227 ‘Probably extant’, and assigned ‘presence’ to all grid cells that overlapped with range polygons.  
 228 Next, we created generalized least squares (gls) models to assess the linear relationships between  
 229 excavators and other categories of forest-associated birds. To take biogeographical differences  
 230

1  
2  
3 231 into account, we proceeded to separate trends across the globe, and created gls models for the six  
4 232 zoogeographic regions separately: Nearctic, Palearctic, Neotropical, Afrotropical, Oriental, and  
5 233 Australasia. We did not restrict our analyses to forested regions, wanting to avoid making  
6 234 subjective decisions on the classification of a grid cell to a specific vegetation/habitat type. Yet,  
7 235 to make sure we did look for possible relationships between these forest-associated species in  
8 236 regions they actually occur, we removed cells with zero excavators/~~woodpeckers~~ and cells where  
9 237 the numbers of secondary cavity-nesters, forest specialists, or all forest birds were lower than  
10 238 that of excavators/~~woodpeckers~~ from further analyses.

11 239 Our data were spatially structured (i.e., high and low richness of birds in different  
12 240 categories (excavators etc.) was spatially clustered) across and within zoogeographic regions, as  
13 241 demonstrated by the global distribution of the relative number of cavity excavators to non-  
14 242 excavating cavity-nesting birds (expressed as the ratio of excavator / non-excavating cavity-  
15 243 nester; Fig. 1). Thus, we followed similar protocols to adjust for spatial autocorrelation as per  
16 244 Storch et al. [432]. This implied the use of gls models with excavator richness as a predictor  
17 245 variable, the richness of one of the categories of forest-associated birds as a response variable,  
18 246 and a variable exponential spatial covariance structure, as these models had the best fit in  
19 247 preliminary tests, which reduced—rather than eliminated—the influence of spatial  
20 248 autocorrelation on our models. In these tests, exponential gls models consistently had the lowest  
21 249 Akaike’s Information Criterion (AIC) value compared to a set of models, including an ordinary  
22 250 least squares model with no spatial structure, and gls models with Gaussian, linear, rational  
23 251 quadratics and spherical spatial covariance structures.

24 252 Even though gls models work well with large datasets, we found that gls models fitted on  
25 253 all data failed to converge (using the R package “nlme” [443]). To circumvent this computational  
26 254 problem, we first grouped grid cells by zoogeographic region. We thereafter ran 1000 models on  
27 255 bootstrap permutations of 1000 randomly selected grid cells (see [24, 454]). Of these 1000 model  
28 256 iterations, we subsequently calculated the mean ( $\pm$ SD), minimum and maximum coefficients of  
29 257 the regression slope. As gls models do not provide a measure of the strength of relationships, we  
30 258 proceeded with a different measure of the strength of each correlation: fitting each exponential  
31 259 gls model to a different, non-overlapping, test data set of 1000 randomly selected grid cells. We  
32 260 then proceeded to calculate the Spearman rho coefficient of the correlation between predicted  
33 261 and observed data, for all 1000 models per zoogeographic region. Finally, we calculated the  
34 262 mean Spearman rho of all significant models per zoogeographic region. We repeated all of these  
35 263 analyses for woodpeckers as a subset of the excavators, with the notable exception of [analyses](#)  
36 264 [for](#) Australasia where woodpeckers are absent. All data, R scripts, and initial results needed to  
37 265 reproduce our analyses presented here are deposited online (Appendix S1).  
38 266

## 39 267 Results

40 268 Using gls modelling to assess the global patterns for the relationships between excavator richness  
41 269 and that of secondary cavity-nesters, forest specialists, and all forest birds, we found positive  
42 270 relationships between [all pairs of comparisons](#). However, these relationships differed in relative  
43 271 strength and [characteristics \(e.g., steepness of regression slope\)](#)-depending on the group of birds  
44 272 and zoogeographic region analysed (Fig. 2, Table 21; [see Table S1 for an overview of the](#)  
45 273 [number of species per group per region](#))).

46 274 [In terms of variation across zoogeographic regions, the relationships between excavators](#)  
47 275 [and all other groups of forest-associated birds were typified by particularly steep regression](#)  
48 276 [slopes in the Neotropics, where the presence of one additional excavator species in a grid cell](#)

277 implied an increase of more than two additional secondary cavity-nesters, ten forest bird species,  
 278 or four forest specialists. In contrast, regression slopes were less steep in predominantly  
 279 temperate and boreal regions such as the Nearctic and Palearctic, where an increase of one  
 280 excavator species signified an increase of approximately one secondary cavity-nester species,  
 281 four to five forest birds, or one forest specialist. More importantly, and similar to variation in the  
 282 slopes of the regressions, we found differences in the strength (as represented by Spearman's  
 283 rho) of these relationships, with ~~aga~~ We found in stronger relationships (higher Spearman rho) in  
 284 the predominantly tropical Afrotropical, Oriental, and Neotropical regions than in the  
 285 comparably more temperate/boreal Nearctic and Palearctic regions, and particularly weak  
 286 relationships in Australasia (Table 1).

287 Although ~~t~~The relationships between excavators and the other three groups of cavity-  
 288 nesting and forest-associated birds were generally similar in nature (positive), without clear  
 289 evidence for our prediction that the relationship between excavators and ~~it~~ cavity-nesters  
 290 would be stronger than that between excavators and larger groups of forest-associated birds that  
 291 include non-cavity-nesters (forest specialists or all forest birds). Instead, we found that there  
 292 were some differences in the relative strength of these relationships (between excavators and the  
 293 three groups of forest-associated birds) ~~d~~ed largely across zoogeographic regions. For  
 294 example, excavator richness was a particularly strong predictor of secondary cavity-nester  
 295 richness and of all forest birds in the ~~l~~entral region ( $\rho = 0.88$  and  $0.86$ , respectively), and  
 296 slightly less so for forest specialists ( $\rho = 0.727$ ), whereas excavator richness in the Afrotropics  
 297 showed a strong relationship with forest specialists ( $\rho = 0.83$ ), forest generalists ( $\rho = 0.91$ )  
 298 and all forest birds taken together ( $\rho = 0.934$ ) and with forest specialists ( $\rho = 0.88$ ), but a  
 299 somewhat weaker association with secondary cavity-nesters ( $\rho = 0.79$ ). Finally, we note that  
 300 excavators in ~~Nevertheless, despite the complete absence of woodpeckers from Australasia~~  
 301 (which include no woodpeckers) showed a moderately strong ~~this region, we did find a weak~~ ( $\rho$   
 302  $= 0.7369$ ) but ~~often~~ and significant ( $p < 0.05$  in 10097 percent of model iterations) positive  
 303 relationship between richness of excavators and with forest specialists, and none with secondary  
 304 cavity-nesters or more generalist forest ~~s~~s.

305 We repeated all analyses for woodpeckers as a subset of excavators and found nearly  
 306 identical results, ~~which is why we opted to list results of these analyses in supplementary Table~~  
 307 ~~S2 and limit our further discussion of these analyses.~~ with again significant positive relationships  
 308 between woodpeckers and other groups of cavity-nesting or forest-associated birds in all regions  
 309 but Australasia, and with steeper regression slopes and stronger relationships in the  
 310 predominantly tropical Neotropical, Oriental and Afrotropical regions as compared to more  
 311 shallow slopes and weaker associations in the Nearctic and Palearctic (Table 2). The relative  
 312 strength of the relationships between woodpeckers and the three other groups of cavity-nesting  
 313 and forest-associated birds again depended on the zoogeographic region (in similar ways as for  
 314 entire group of excavators) such that woodpeckers were strong predictors of the richness of other  
 315 birds as excavators in general, with the notable exception of Australasia. ~~Nevertheless, despite~~  
 316 ~~the complete absence of woodpeckers from this region, we did find a weak~~ ( $\rho = 0.69$ ) but  
 317 ~~often significant~~ ( $p < 0.05$  in 97 percent of model iterations) positive relationship between  
 318 richness of excavators and forest specialists.

## 319 Discussion

320 We found strong positive relationships between excavators/~~woodpeckers~~ and secondary cavity-  
 321 nesters, ~~forest specialists, forest generalists and forest birds in general~~ and forest specialists at

1  
2  
3 323 global and zoogeographic scales, although these relationships differed in both strength and  
4 324 characteristics (regression slopes) across zoogeographic regions. Moreover, we found that it  
5 325 depended on the region whether relationships between excavators and secondary cavity-nesters  
6 326 were stronger or weaker than those between excavators and non-cavity-nesting forest birds. This  
7 327 indicates that both direct facilitation of nest-cavities and indirect associations with forest  
8 328 elements and shared habitat preferences are likely to play a role in shaping these relationships,  
9 329 but that the relative importance of both depends on the region under consideration. Our results  
10 330 imply that excavators and woodpeckers (a predominant subset of excavators) hold potential as  
11 331 indicators and management surrogates across most of the world [465], with the possible  
12 332 exception of the Australasian region, but also that we need to take differences among  
13 333 zoogeographic regions (e.g., in the composition of local and regional nest-webs with regards to  
14 334 ~~the relative numbers of excavators and secondary cavity-nesters as seen in Fig. 1~~) into account if  
15 335 we are to adopt these as surrogates for conservation or management.

16 336 ~~Many excavators, woodpeckers included, have strong preferences for specific forest~~  
17 337 ~~elements, such as dead and decaying trees or particularly large trees (see e.g., [28]). In turn, these~~  
18 338 ~~elements, and the processes that drive their presence and abundance, are of great importance to~~  
19 339 ~~habitat formation and create additional niche space to support many groups of organisms [46].~~  
20 340 ~~Therefore, we can expect that forests that meet the habitat requirements of excavators (e.g.,~~  
21 341 ~~certain levels of availability of decaying and dead wood) provide high-quality habitat for many~~  
22 342 ~~other wildlife species. This may explain the higher richness of forest birds in areas occupied by~~  
23 343 ~~high numbers of excavators/woodpeckers. For non-excavating species that utilize tree cavities~~  
24 344 ~~for their nests, this relationship may be enhanced by the fact that excavators/woodpeckers create~~  
25 345 ~~or facilitate potential nest substrates [31]. In other words, the strong habitat preferences of many~~  
26 346 ~~excavators/woodpeckers, as well as the facilitatory role excavators play in providing nest~~  
27 347 ~~substrates, make these birds potentially effective indicators of many forest-associated species~~  
28 348 ~~and, by extension, of high-quality forests (i.e., natural, old-growth; [17, 18].~~

29 349 We did not find support for the prediction that relationships between excavators and  
30 350 secondary-cavity nesters are relatively stronger than those between excavators and secondary  
31 351 cavity-nesters in temperate and boreal regions (Holarctic and Palearctic), which would reflect the  
32 352 additional importance of cavity facilitation in these regions, nor that the reverse was true in all  
33 353 predominantly tropical regions. In general, we would predict excavated cavities to be less  
34 354 important for secondary-cavity nesters in the tropics as high rates of precipitation and  
35 355 temperature lead to relatively rapid formation of cavities through fungal activity [54] and lower  
36 356 persistence (i.e., longevity) of excavated cavities [33,55]. This, in turn, should lead to relatively  
37 357 higher use of decay-formed cavities by secondary cavity-nesters in the tropics [33, 55], and less  
38 358 dependence on excavators for the supply of nest-cavities. For example, even woodpeckers,  
39 359 occasionally use decay-formed cavities in Neotropical temperate rainforests where tree decay is  
40 360 the key driver of nest-web structure [55]. Indeed, we see that the relationship between excavators  
41 361 and secondary cavity-nesters is not stronger (Neotropics) or even weaker (Afrotropics) than  
42 362 those between excavators and non-cavity-nesting forest birds (specialists or generalists), in two  
43 363 of the more tropical regions. But we also found that the relationship between excavators and  
44 364 secondary cavity-nester was relatively strong in the Oriental region, stronger in fact than those  
45 365 between excavators and any other group of forest birds. This may be the result of the specific  
46 366 characteristics of the forests or avifaunal communities in this region, but is also likely to be  
47 367 influenced by relatively high logging rates in the Oriental region. Logging reduces the  
48 368 availability of large dead trees, which in turn diminishes substrate availability for excavators as

well as the opportunity for cavities to form via decay [1], potentially making secondary cavity-nesters more dependent on excavated cavities. In contrast to our predictions, relationships between excavators and secondary cavity-nesters and between excavators and forest specialists were not necessarily stronger (though this was the case in the Neotropical region) than those between excavators and forest generalists. We do not have a clear explanation for this finding, though we argue that forest specialists are not necessarily closer linked than forest generalists to forest elements (e.g., snags) also preferred by excavators and that both forest generalists and excavators might share landscapes where forest specialists are hard to find, for example open landscapes with scattered trees [2]. Finally, we found that regardless of the relationship, all relationships between excavators and other bird groups were stronger in the more tropical (especially the Afrotropical and Neotropical) regions, with the exception of Australasia (see below), than in the temperate and boreal regions. Arguably, excavators are particularly strong indicators of other bird groups in these tropical regions as these regions still contain vast tracts of unlogged and unmanaged forest, a topic for further research.

Relationships between excavators and groups of forest-associated birds were less evident in Australasia, which is a region that differs largely from all others in both avifauna (e.g., there are no woodpeckers here but there is a relatively high richness of cavity-nesters [11]) and forest structure and dynamics (e.g., cavity densities in Australasian forests are among the highest globally [54]). Specifically, we found a moderately strong relationship between excavators and non-cavity-nesting forest specialists in Australasia, but no such relationships between excavators and secondary-cavity nesters or forest birds with broader habitat requirements (i.e. forest generalists). This, we reason, indicates that the excavators in this region (which notably excludes woodpeckers) show a preference for forest conditions (e.g., the provision of trees that are in advanced stages of decay, given that many of these excavators are weaker excavators that require softer or rotting wood; see [11] for species) that are shared by many forest specialists. In contrast, secondary cavity-nesters in Australasia may depend on elements not formed, or particularly required, by excavators (e.g., large trees of a certain age [3] that contain many dead branches and have accumulated multiple decay-formed cavities [4]).

[2] We detected relative differences in strengths among the relationships between excavators/woodpeckers and secondary cavity-nesters, forest birds, and forest specialists across zoogeographic regions. These differences were most likely to stem from the same variation among species and ecosystem characteristics discussed above (e.g., the distribution and relative importance of cavity-forming agents), and indicate that richness of excavators/woodpeckers may be a better indicator of richness of other cavity and forest-associated species in one region than in another. In addition, the relative strength of relationships between excavators and other forest birds might reflect whether excavators are indicative of the richness of other species due to shared associations with particular forest elements (indirect association), due to their direct facilitation of nest cavities (direct facilitation), or whether both factors play a role. For example, we found that relationships between excavator and forest bird or forest specialist richness in the Afrotropics are relatively strong, whereas the relationship between excavators and secondary cavity-nesters is comparatively weaker. This might indicate that, in the Afrotropics, excavators are especially strong predictors of other groups of forest-associated birds through their mutual habitat requirements, rather than through their direct facilitation of tree-cavities. In contrast, excavators are relatively stronger predictors of secondary cavity-nesters in the Oriental region, which might lead to hypotheses that excavators play a more direct, nest-web structuring role through the provision of cavities in the Oriental region.

415 Beyond variation in the strength of relationships between regions we also found that  
 416 regressions differed in slopes, both across regions and across the different relationships tested.  
 417 For example, the steep slopes we found for correlations between excavators/woodpeckers and  
 418 other non-cavity-nesting forest birds in the predominantly tropical Neotropical regions  
 419 (Neotropics, Oriental, Afrotropical) contrast with the more shallow slopes in the temperate/boreal  
 420 Palaearctic and Nearctic regions (Palearctic, Neartic). And, within the Neotropical region, the  
 421 relationship between excavators and secondary cavity-nesters showed shallower slopes than that  
 422 between excavators and non-cavity-nesting forest birds. These differences mainly in slopes  
 423 mainly reflect differences in richness between regions and between group of forest birds, with  
 424 relatively steeper slopes representing a relatively larger increase in richness of a particular group  
 425 of birds per increase in the number of excavators. In turn, we may look at macro-scale  
 426 processes (e.g., as outlined by Gaston [487]), such as speciation events, are likely to account for  
 427 some of these differences among zoogeographic regions. First, that drive these differences in  
 428 overall richness of birds [498], including cavity-nesting birds [11], and other possible factors  
 429 (e.g., also of trees as potential substrates for cavities may also differ across regions [49]).  
 430 differs both among and within zoogeographic regions, likely inducing differences in tree-cavity-  
 431 nesting assemblages [33].

433 However, variation in species composition and associated variation in functional richness  
 434 (i.e., the variety of functional traits varies across spatial and environmental gradients, as has been  
 435 shown, for example, for dietary guilds [44]), is likely to contribute most to spatial variation in  
 436 nest-web assemblages across global scales. Specifically, with regards to nest-webs, species with  
 437 the ability to excavate cavities are not randomly distributed across the world. For example, the  
 438 Australasian region lacks the presence of Piciformes, the Order to which nearly 75% of  
 439 excavators belong [11], whereas speciation processes have led to a relatively high diversity of  
 440 Piciformes in Southeast Asia [50, 51].

441 The observed spatial variation in the relationships between excavators and other forest  
 442 birds within zoogeographic regions may stem mainly from local differences in habitat and  
 443 vegetation characteristics (e.g., tree species composition and climatic variables [52]) as well as  
 444 spatial variation in tree cavity availability and their formation agents [53], rather than from  
 445 speciation processes. Such differences would, for example, explain how in the Neotropics,  
 446 cavity-nesting assemblages studied in the temperate mountain forests of Chile [54] had a 1:6  
 447 ratio of excavators (4 species) to secondary cavity-nesters (25 species) whereas a subtropical  
 448 Atlantic moist forest [32] supported relatively higher numbers of excavators with a 1:3 ratio of  
 449 excavators (9 species) to secondary cavity-nesters (25 species). An important factor to consider  
 450 here is the potential for regional variation in cavity substrate availability (e.g., large trees) and  
 451 the supply of decay-formed cavities due to differences in the onset and rate of decay processes as  
 452 well as forest management (e.g., [55-57]. For example, retention of large trees can, in many  
 453 forests, provide nesting and roosting opportunities for additional species as both opportunities for  
 454 excavation and processes of decay become more prevalent.

455 In addition, we can hypothesize that at least some variation at regional scales stems from  
 456 differences in the propensities for re-use of excavated cavities by secondary cavity-nesters. For  
 457 example, there are signs that non-excavating cavity-nesters may experience higher predation risk  
 458 in excavated versus decay-formed cavities, which may induce a preference for decay-formed  
 459 cavities among secondary users if decay-formed cavities are in sufficient supply (e.g., a pattern  
 460 found in some of the few unmanaged temperate forests in the European parts of the Palearctic;

1  
2  
3  
4 461 [~~58, 59~~]). In turn, the availability of decay-formed cavities may correspond to the  
5 462 aforementioned historical or current forest management practices as well as spatial patterns in  
6 463 climatic factors. For example, proportions of decay-formed cavities used are particularly high in  
7 464 parts of the world with high amounts of precipitation and more active regimes of fungal growth  
8 465 (e.g., most of the wet tropics), with both being lower in anthropogenically-disturbed landscapes  
9 466 than in primary forests [53]. In turn, high availability of decay-formed cavities might allow for a  
10 467 relatively high richness of secondary cavity-nesters, with fewer species dependent on excavators  
11 468 for the supply of nest-cavities. For example, even woodpeckers, commonly considered primary  
12 469 excavators, occasionally use decay-formed cavities in Neotropical temperate rainforests where  
13 470 tree decay is the key driver of nest-web structure [54].

14 471 Finally, we find that relatively higher numbers of secondary cavity-nesters, or cavity-  
15 472 nesters in general, may occur in regions where many species are habitat generalists that utilize  
16 473 other nest substrates than tree cavities (e.g., 40% of cavity nesters in Neotropical temperate  
17 474 forests are facultative users of tree cavities for nesting [54]), as compared to regions where most  
18 475 cavity nesters are obligate tree-cavity users (e.g., over 85% of cavity nesters in temperate  
19 476 Neartic forests [59]). Finally, it is worth noting that cavity availability and use are also likely to  
20 477 be influenced by cavity persistence (longevity), a characteristic that can have considerable spatial  
21 478 variation due to factors such as land-use patterns (e.g., logging), climatic factors (e.g., rainfall),  
22 479 and cavity characteristics (e.g., whether they are located in live or dead trees [60–62]):

23 480 ~~We detected relative differences in strengths among the relationships between~~  
24 481 ~~excavators/woodpeckers and secondary cavity-nesters, forest birds, and forest specialists across~~  
25 482 ~~zoogeographic regions. These differences were most likely to stem from the same variation~~  
26 483 ~~among species and ecosystem characteristics discussed above (e.g., the distribution and relative~~  
27 484 ~~importance of cavity-forming agents), and indicate that richness of excavators/woodpeckers may~~  
28 485 ~~be a better indicator of richness of other cavity and forest-associated species in one region than in~~  
29 486 ~~another. In addition, the relative strength of relationships between excavators and other forest~~  
30 487 ~~birds might reflect whether excavators are indicative of the richness of other species due to~~  
31 488 ~~shared associations with particular forest elements (indirect association), due to their direct~~  
32 489 ~~facilitation of nest cavities (direct facilitation), or whether both factors play a role. For example,~~  
33 490 ~~we found that relationships between excavator and forest bird or forest specialist richness in the~~  
34 491 ~~Afrotropics are relatively strong, whereas the relationship between excavators and secondary~~  
35 492 ~~cavity-nesters is comparatively weaker. This might indicate that, in the Afrotropics, excavators~~  
36 493 ~~are especially strong predictors of other groups of forest-associated birds through their mutual~~  
37 494 ~~habitat requirements, rather than through their direct facilitation of tree cavities. In contrast,~~  
38 495 ~~excavators are relatively stronger predictors of secondary cavity-nesters in the Oriental region,~~  
39 496 ~~which might lead to hypotheses that excavators play a more direct, nest-web structuring role~~  
40 497 ~~through the provision of cavities in the Oriental region.~~

41 498 Some secondary cavity-nesters might use cavities created by multiple excavator species,  
42 499 whereas others predominantly use cavities formed by processes of degradation, damage or insect  
43 500 activity [31, 32, 39]. In addition, certain excavators might be especially abundant or provide  
44 501 cavities that are very commonly reused by several species, whereas others are scarce and leave  
45 502 only a few short-lived cavities that would not be generally available for use by secondary cavity-  
46 503 nesters. Given such complexities among nest-web interactions, it is important to emphasize that  
47 504 we present general global patterns in the composition of tree-cavity-using assemblages (i.e.,  
48 505 communities of linked species that often interact within networks). We lack evidence for direct



causal links between the presence of one species group with another, as well as direct evidence of species interactions at the zoogeographic regional scale.

Around most of the world, we found strong and positive relationships ~~of a universal nature (strong and positive)~~ between excavator and forest bird richness. As such, we deem excavators, ~~of which woodpeckers are an important subset~~, to be useful indicator species for forest bird diversity at multiple-broad spatial scales, as was previously proven at stand- and landscape-scales. They form a small and fairly easy to identify (even by citizen scientists) subset of a larger group of species (forest birds) often studied to understand the effects of anthropogenic disturbances. Moreover, many woodpeckers respond to playbacks, which may therefore become an effective survey tool that allows researchers to fairly easily cover relatively large areas (e.g., [64]). Studies of excavators ~~(or woodpeckers specifically)~~, especially in high biodiversity tropical regions, might provide quick measures of forest quality and biodiversity, which may in turn guide forest management decisions (e.g., improving the retention of large trees). A comprehensive study of all forest birds in some regions like the Amazon or Congo basin (where, notably, there are hotspots of woodpecker richness [65]) would require considerable local expertise and training, which is often difficult to achieve due to social and monetary limitations. Thus, we conclude, excavators have excellent potential as study subjects for conservation monitoring and planning initiatives, in comparative research, and to guide the establishment of region-wide forest conservation strategies, especially in the largely understudied tropical regions of the world.

## 527 **Acknowledgments**

528 We would like to thank Lisa Manne, and Kristina Cockle and two anonymous reviewers for their  
529 critical remarks on drafts of this article.

## 531 **Funding**

532 This research was not externally funded.

## 534 **References**

- 535 1 Allan JR, Venter O, Maxwell S, Bertzky B, Jones K, Shi Y, Watson JE. 2017 Recent increases in human  
536 pressure and forest loss threaten many Natural World Heritage Sites. *Biological conservation*. **206**, 47-  
537 55.
- 538 2 Hansen MC, Stehman SV, Potapov PV. 2010 Quantification of global gross forest cover loss.  
539 *Proceedings of the National Academy of Sciences*. **107**, 8650-8655.
- 540 3 Barlow J, Lennox GD, Ferreira J, Berenguer E, Lees AC, Mac Nally R, Thomson JR, de Barros Ferraz SF,  
541 Louzada J, Oliveira VHF. 2016 Anthropogenic disturbance in tropical forests can double biodiversity loss  
542 from deforestation. *Nature*. **535**, 144.
- 543 4 Gaston KJ, Blackburn TM, Goldewijk KK. 2003 Habitat conversion and global avian biodiversity loss.  
544 *Proceedings of the Royal Society of London. Series B: Biological Sciences*. **270**, 1293-1300.
- 545 5 Betts MG, Wolf C, Pfeifer M, Banks-Leite C, Arroyo-Rodríguez V, Ribeiro DB, Barlow J, Eigenbrod F,  
546 Faria D, Fletcher RJ. 2019 Extinction filters mediate the global effects of habitat fragmentation on  
547 animals. *Science*. **366**, 1236-1239.
- 548 6 Carignan V, Villard M-A. 2002 Selecting indicator species to monitor ecological integrity: a review.  
549 *Environmental monitoring and assessment*. **78**, 45-61.
- 550 7 Canterbury GE, Martin TE, Petit DR, Petit LJ, Bradford DF. 2000 Bird communities and habitat as  
551 ecological indicators of forest condition in regional monitoring. *Conservation Biology*. **14**, 544-558.

- 1  
2  
3 552 8 Venier LA, Pearce JL. 2004 Birds as indicators of sustainable forest management. *The Forestry*  
4 553 *Chronicle*. **80**, 61-66.
- 5 554 9 Martin K, Ibarra JT, Drever M. 2015 Avian surrogates in terrestrial ecosystems: theory and practice. In  
6 555 *Indicators and surrogates of biodiversity and environmental change* (eds D Lindenmayer, P Barton, J  
7 556 Pierson), pp 33-44. Melbourne & London: CSIRO Publishing & CRC Press.
- 8 557 10 Ibarra JT, Martin M, Cockle KL, Martin K. 2017 Maintaining ecosystem resilience: functional  
9 558 responses of tree cavity nesters to logging in temperate forests of the Americas. *Scientific reports*. **7**,  
10 559 4467.
- 11 560 11 van der Hoek Y, Gaona GV, Martin K. 2017 The diversity, distribution and conservation status of the  
12 561 tree-cavity-nesting birds of the world. *Diversity and Distributions*. **23**, 1120-1131.
- 13 562 12 McClelland BR, McClelland PT. 1999 Pileated woodpecker nest and roost trees in Montana: links with  
14 563 old-growth and forest "health". *Wildlife Society Bulletin*. 846-857.
- 15 564 13 Stachura-Skierczyńska K, Kosiński Z. 2016 Do factors describing forest naturalness predict the  
16 565 occurrence and abundance of middle spotted woodpecker in different forest landscapes? *Ecological*  
17 566 *Indicators*. **60**, 832-844.
- 18 567 14 Marchetti M. 2005 *Monitoring and indicators of forest biodiversity in Europe: from ideas to*  
19 568 *operationality*. Joensuu, Finland: European Forest Institute.
- 20 569 15 Roberge J-M, Angelstam P. 2006 Indicator species among resident forest birds—a cross-regional  
21 570 evaluation in northern Europe. *Biological Conservation*. **130**, 134-147.
- 22 571 16 Virkkala R. 2006 Why study woodpeckers? The significance of woodpeckers in forest ecosystems.  
23 572 *Annales Zoologici Fennici*. 82-85.
- 24 573 17 Drever MC, Aitken KE, Norris AR, Martin K. 2008 Woodpeckers as reliable indicators of bird richness,  
25 574 forest health and harvest. *Biological conservation*. **141**, 624-634.
- 26 575 18 Drever MC, Martin K. 2010 Response of woodpeckers to changes in forest health and harvest:  
27 576 Implications for conservation of avian biodiversity. *Forest Ecology and Management*. **259**, 958-966.
- 28 577 19 Mikusiński G, Gromadzki M, Chylarecki P. 2001 Woodpeckers as indicators of forest bird diversity.  
29 578 *Conservation Biology*. **15**, 208-217.
- 30 579 20 Angelstam PK, Bütler R, Lazdinis M, Mikusiński G, Roberge J-M. 2003. Habitat thresholds for focal  
31 580 species at multiple scales and forest biodiversity conservation—dead wood as an example. *Annales*  
32 581 *Zoologici Fennici*. 473-482.
- 33 582 21 Nilsson SG, Hedin J, Niklasson M. 2001 Biodiversity and its assessment in boreal and nemoral forests.  
34 583 *Scandinavian Journal of Forest Research*. **16**, 10-26.
- 35 584 22 Hess GR, Bartel RA, Leidner AK, Rosenfeld KM, Rubino MJ, Snider SB, Ricketts TH. 2006 Effectiveness  
36 585 of biodiversity indicators varies with extent, grain, and region. *Biological Conservation*. **132**, 448-457.
- 37 586 23 Collen B, Ram M, Zamin T, McRae L. 2008 The tropical biodiversity data gap: addressing disparity in  
38 587 global monitoring. *Tropical Conservation Science*. **1**, 75-88.
- 39 588 24 Ilsøe SK, Kissling WD, Fjeldså J, Sandel B, Svenning JC. 2017 Global variation in woodpecker species  
40 589 richness shaped by tree availability. *Journal of Biogeography*. **44**, 1824-1835.
- 41 590 25 Bell D, Hjältén J, Nilsson C, Jørgensen D, Johansson T. 2015 Forest restoration to attract a putative  
42 591 umbrella species, the white-backed woodpecker, benefited saproxylic beetles. *Ecosphere*. **6**, 1-14.
- 43 592 26 Gatica-Saavedra P, Echeverría C, Nelson CR. 2017 Ecological indicators for assessing ecological  
44 593 success of forest restoration: a world review. *Restoration ecology*. **25**, 850-857.
- 45 594 27 Hoyt JS, Hannon SJ. 2002 Habitat associations of black-backed and three-toed woodpeckers in the  
46 595 boreal forest of Alberta. *Canadian Journal of Forest Research*. **32**, 1881-1888.
- 47 596 28 Tikkanen O-P, Martikainen P, Hyvärinen E, Junninen K, Kouki J. 2006. Red-listed boreal forest species  
48 597 of Finland: associations with forest structure, tree species, and decaying wood. *Annales Zoologici*  
49 598 *Fennici*. 373-383.

- 1  
2  
3 599 29 Bütler R, Angelstam P, Ekelund P, Schlaepfer R. 2004 Dead wood threshold values for the three-toed  
4 600 woodpecker presence in boreal and sub-Alpine forest. *Biological Conservation*. **119**, 305-318.
- 5 601 30 McLaren MA, Thompson ID, Baker JA. 1998 Selection of vertebrate wildlife indicators for monitoring  
6 602 sustainable forest management in Ontario. *The Forestry Chronicle*. **74**, 241-248.
- 7 603 31 Martin K, Eadie JM. 1999 Nest webs: A community-wide approach to the management and  
8 604 conservation of cavity-nesting forest birds. *Forest Ecology and Management*. **115**, 243-257.
- 9 605 32 Cockle KL, Martin K, Robledo G. 2012 Linking fungi, trees, and hole-using birds in a Neotropical tree-  
10 606 cavity network: Pathways of cavity production and implications for conservation. *Forest Ecology and*  
11 607 *Management*. **264**, 210-219.
- 12 608 33 Cockle KL, Martin K, Wesolowski T. 2011 Woodpeckers, decay, and the future of cavity-nesting  
13 609 vertebrate communities worldwide. *Frontiers in Ecology and the Environment*. **9**, 377-382.
- 14 610 34 Tylianakis JM, Klein AM, Lozada T, Tscharrntke T. 2006 Spatial scale of observation affects  $\alpha$ ,  $\beta$  and  $\gamma$   
15 611 diversity of cavity-nesting bees and wasps across a tropical land-use gradient. *Journal of Biogeography*.  
16 612 **33**, 1295-1304.
- 17 613 [35 Powell S, Costa AN, Lopes CT, Vasconcelos HL. 2011 Canopy connectivity and the availability of](#)  
18 614 [diverse nesting resources affect species coexistence in arboreal ants. \*Journal of Animal Ecology\*. \*\*80\*\*, 352-](#)  
19 615 [360.](#)
- 20 616 [36 Jankowiak R, Ciach M, Bilański P, Linnakoski R. 2019. Diversity of wood-inhabiting fungi in](#)  
21 617 [woodpecker nest cavities in southern Poland. \*Acta Mycologica\*. \*\*54\*\*, 1126. doi:10.5586/am.1126](#)
- 22 618 [37 Jusino MA, Lindner DL, Banik MT, Rose KR, Walters JR. 2016 Experimental evidence of a symbiosis](#)  
23 619 [between red-cockaded woodpeckers and fungi. \*Proceedings of the Royal Society B: Biological Sciences\*.](#)  
24 620 [283, 20160106.](#)
- 25 621 [38 Bull EL, Jackson JA., 1995 Pileated Woodpecker \(\*Dryocopus pileatus\*\). In: \*The birds of North America\*](#)  
26 622 [\(eds A Poole, F Gill\). Washington DC: The Academy of Natural Sciences & The American Ornithologists'](#)  
27 623 [Union.](#)
- 28 624 [39 Montellano MGN, Blendinger PG, Macchi L. 2013 Sap consumption by the White-fronted](#)  
29 625 [Woodpecker and its role in avian assemblage structure in dry forests. \*The Condor\*. \*\*115\*\*, 93-101.](#)
- 30 626 [40 Ruggera RA, Schaaf AA, Vivanco CG, Politi N, Rivera LO. 2016 Exploring nest webs in more detail to](#)  
31 627 [improve forest management. \*Forest Ecology and Management\*. \*\*372\*\*, 93-100.](#)
- 32 628 [41 Canterbury GE, Martin TE, Petit DR, Petit LJ, Bradford DF. 2000. Bird communities and habitat as](#)  
33 629 [ecological indicators of forest condition in regional monitoring. \*Conservation Biology\*. \*\*14\*\*\(2\), 544-558.](#)
- 34 630 [42 Betts MG, Wolf C, Ripple WJ, Phalan B, Millers KA, Duarte A, Butchart SH, Levi T. 2017 Global forest](#)  
35 631 [loss disproportionately erodes biodiversity in intact landscapes. \*Nature\*. \*\*547\*\*, 441-444.](#)
- 36 632 [43 BirdLife International and NatureServe 2015 \*Bird species distribution maps of the world\*. Cambridge](#)  
37 633 [and Arlington: BirdLife International and NatureServe.](#)
- 38 634 [44 Storch D, Davies RG, Zajíček S, Orme CDL, Olson V, Thomas GH, Ding TS, Rasmussen PC, Ridgely RS,](#)  
39 635 [Bennett PM. 2006 Energy, range dynamics and global species richness patterns: reconciling mid-domain](#)  
40 636 [effects and environmental determinants of avian diversity. \*Ecology Letters\*. \*\*9\*\*, 1308-1320.](#)
- 41 637 [45 Pinheiro J, Bates D, DebRoy S, Sarkar D, Heisterkamp S, Van Willigen B. 2017 Package 'nlme'. \*Linear\*](#)  
42 638 [and \*Nonlinear Mixed Effects Models, version 3-1\*. Available from \[https://cran.r-\]\(https://cran.r-project.org/web/packages/nlme/nlme.pdf\)](#)  
43 639 [project.org/web/packages/nlme/nlme.pdf](#) (accessed January 15, 2018).
- 44 640 [46 Kissling WD, Sekercioglu CH, Jetz W. 2012 Bird dietary guild richness across latitudes, environments](#)  
45 641 [and biogeographic regions. \*Global Ecology and Biogeography\*. \*\*21\*\*, 328-340.](#)
- 46 642 [47 Hunter M, Westgate M, Barton P, Calhoun A, Pierson J, Tulloch A, Beger M, Branquinho C, Caro T,](#)  
47 643 [Gross J. 2016 Two roles for ecological surrogacy: Indicator surrogates and management surrogates.](#)  
48 644 [\*Ecological Indicators\*. \*\*63\*\*, 121-125.](#)

- 1  
2  
3  
4 645 [48 Remm J, Löhmus A. 2011 Tree cavities in forests—the broad distribution pattern of a keystone](#)  
5 [structure for biodiversity. \*Forest Ecology and Management\*. \*\*262\*\*, 579-585.](#)  
6 647 [49 Altamirano TA, Ibarra JT, Martin K, Bonacic C. 2017 The conservation value of tree decay processes as](#)  
7 [a key driver structuring tree cavity nest webs in South American temperate rainforests. \*Biodiversity and\*](#)  
8 [Conservation. \*\*26\*\*, 2453-2472.](#)  
9 650 [50 Styring AR, bin Hussin MZ. 2004. Effects of logging on woodpeckers in a Malaysian rain forest: the](#)  
10 [relationship between resource availability and woodpecker abundance. \*Journal of Tropical Ecology\*.](#)  
11 [20\(5\), 495-504.](#)  
12 653 [51 Fischer J, Stott J, Law BS. 2010. The disproportionate value of scattered trees. \*Biological\*](#)  
13 [Conservation. \*\*143\*\*\(6\), 1564-1567.](#)  
14 654 [52 Lindenmayer DB, Blanchard W, McBurney L, Blair D, Banks S, Likens GE, Franklin JF, Laurance WF,](#)  
15 [Stein JA, Gibbons P. 2012. Interacting factors driving a major loss of large trees with cavities in a forest](#)  
16 [ecosystem. \*PLoS One\*. \*\*7\*\*\(10\).](#)  
17 657 [53 Gibbons P, Lindenmayer DB, Barry SC, Tanton MT. 2002. Hollow selection by vertebrate fauna in](#)  
18 [forests of southeastern Australia and implications for forest management. \*Biological Conservation\*. \*\*103\*\*,](#)  
19 [1-12.](#)  
20 660 [54 Gaston KJ. 2000 Global patterns in biodiversity. \*Nature\*. \*\*405\*\*, 220.](#)  
21 661 [55 Blackburn TM, Gaston KJ. 1996 Spatial patterns in the species richness of birds in the New World.](#)  
22 [Ecography. \*\*19\*\*, 369-376.](#)  
23 662 [56 Currie DJ, Paquin V. 1987 Large-scale biogeographical patterns of species richness of trees. \*Nature\*.](#)  
24 [329, 326-327.](#)  
25 664 [57 Baumgardt JA, Sauder JD, Nicholson KL. 2014. Occupancy modeling of woodpeckers: maximizing](#)  
26 [detections for multiple species with multiple spatial scales. \*Journal of Fish and Wildlife Management\*.](#)  
27 [5\(2\), 198-207.](#)  
28 666 [58 Mikusiński G. 2006 Woodpeckers: distribution, conservation, and research in a global perspective.](#)  
29 [Annales Zoologici Fennici. 86-95.](#)  
30 667 [59 Vergara-Tabares DL, Lammertink M, Verga EG, Schaaf AA, Nori J. 2018. Gone with the forest:](#)  
31 [Assessing global woodpecker conservation from land use patterns. \*Diversity and Distributions\*. \*\*24\*\*, 640-](#)  
32 [51.](#)  
33 671 [35 Powell S, Costa AN, Lopes CT, Vasconcelos HL. 2011 Canopy connectivity and the availability of](#)  
34 [diverse nesting resources affect species coexistence in arboreal ants. \*Journal of Animal Ecology\*. \*\*80\*\*, 352-](#)  
35 [360.](#)  
36 674 [38 Jusino MA, Lindner DL, Banik MT, Rose KR, Walters JR. 2016 Experimental evidence of a symbiosis](#)  
37 [between red-cockaded woodpeckers and fungi. \*Proceedings of the Royal Society B: Biological Sciences\*.](#)  
38 [283, 20160106.](#)  
39 676 [36 Bull EL, Jackson JA., 1995 Pileated Woodpecker \(\*Dryocopus pileatus\*\). In: \*The birds of North America\*](#)  
40 [\(eds A Poole, F Gill\). Washington DC: The Academy of Natural Sciences & The American Ornithologists'](#)  
41 [Union.](#)  
42 678 [37 Montellano MGN, Blendinger PG, Macchi L. 2013 Sap consumption by the White-fronted](#)  
43 [Woodpecker and its role in avian assemblage structure in dry forests. \*The Condor\*. \*\*115\*\*, 93-101.](#)  
44 680 [38 Jusino MA, Lindner DL, Banik MT, Rose KR, Walters JR. 2016 Experimental evidence of a symbiosis](#)  
45 [between red-cockaded woodpeckers and fungi. \*Proceedings of the Royal Society B: Biological Sciences\*.](#)  
46 [283, 20160106.](#)  
47 683 [39 Ruggera RA, Schaaf AA, Vivanco CG, Politi N, Rivera LO. 2016 Exploring nest webs in more detail to](#)  
48 [improve forest management. \*Forest Ecology and Management\*. \*\*372\*\*, 93-100.](#)  
49 685 [40 Betts MG, Wolf C, Ripple WJ, Phalan B, Millers KA, Duarte A, Butchart SH, Levi T. 2017 Global forest](#)  
50 [loss disproportionately erodes biodiversity in intact landscapes. \*Nature\*. \*\*547\*\*, 441-444.](#)  
51 687  
52  
53  
54  
55  
56 691

- 692 41 BirdLife International and NatureServe. 2015 *Bird species distribution maps of the world*. Cambridge  
693 and Arlington: BirdLife International and NatureServe.
- 694 42 Storch D, Davies RG, Zajíček S, Orme CDL, Olson V, Thomas GH, Ding TS, Rasmussen PC, Ridgely RS,  
695 Bennett PM. 2006 Energy, range dynamics and global species richness patterns: reconciling mid-domain  
696 effects and environmental determinants of avian diversity. *Ecology Letters*. **9**, 1308-1320.
- 697 43 Pinheiro J, Bates D, DebRoy S, Sarkar D, Heisterkamp S, Van Willigen B. 2017 Package 'nlme'. *Linear  
698 and Nonlinear Mixed Effects Models, version 3.1*. Available from [https://cran.r-](https://cran.r-project.org/web/packages/nlme/nlme.pdf)  
699 [project.org/web/packages/nlme/nlme.pdf](https://cran.r-project.org/web/packages/nlme/nlme.pdf) (accessed January 15, 2018).
- 700 44 Kissling WD, Sekercioglu CH, Jetz W. 2012 Bird dietary guild richness across latitudes, environments  
701 and biogeographic regions. *Global Ecology and Biogeography*. **21**, 328-340.
- 702 45 Hunter M, Westgate M, Barton P, Calhoun A, Pierson J, Tulloch A, Beger M, Branquinho C, Caro T,  
703 Gross J. 2016 Two roles for ecological surrogacy: Indicator surrogates and management surrogates.  
704 *Ecological Indicators*. **63**, 121-125.
- 705 46 Stokland JN, Siitonen J, Jönsson BG. 2012 *Biodiversity in dead wood*. Cambridge, UK: Cambridge  
706 University Press.
- 707 47 Gaston KJ. 2000 Global patterns in biodiversity. *Nature*. **405**, 220.
- 708 48 Blackburn TM, Gaston KJ. 1996 Spatial patterns in the species richness of birds in the New World.  
709 *Ecography*. **19**, 369-376.
- 710 49 Currie DJ, Paquin V. 1987 Large-scale biogeographical patterns of species richness of trees. *Nature*.  
711 **329**, 326-327.
- 712 50 Benz BW, Robbins MB, Peterson AT. 2006 Evolutionary history of woodpeckers and allies (Aves:  
713 Picidae): placing key taxa on the phylogenetic tree. *Molecular phylogenetics and evolution*. **40**, 389-399.
- 714 51 Mikusiński G. 2006 Woodpeckers: distribution, conservation, and research in a global perspective.  
715 *Annales Zoologici Fennici*. 86-95.
- 716 52 Huston MA. 1999 Local processes and regional patterns: appropriate scales for understanding  
717 variation in the diversity of plants and animals. *Oikos*. **86**, 393-401.
- 718 53 Remm J, Löhmus A. 2011 Tree cavities in forests—the broad distribution pattern of a keystone  
719 structure for biodiversity. *Forest Ecology and Management*. **262**, 579-585.
- 720 54 Altamirano TA, Ibarra JT, Martin K, Bonacic C. 2017 The conservation value of tree decay processes as  
721 a key driver structuring tree cavity nest webs in South American temperate rainforests. *Biodiversity and  
722 Conservation*. **26**, 2453-2472.
- 723 55 Andersson J, Domingo-Gómez E, Michon S, Roberge J-M. 2018 Tree cavity densities and  
724 characteristics in managed and unmanaged Swedish boreal forest. *Scandinavian journal of forest  
725 research*. **33**, 233-244.
- 726 56 Goodburn JM, Lorimer CG. 1998 Cavity trees and coarse woody debris in old-growth and managed  
727 northern hardwood forests in Wisconsin and Michigan. *Canadian Journal of Forest Research*. **28**, 427-  
728 438.
- 729 57 Gutzat F, Dormann CF. 2018 Decaying trees improve nesting opportunities for cavity-nesting birds in  
730 temperate and boreal forests: A meta-analysis and implications for retention forestry. *Ecology and  
731 evolution*. **8**, 8616-8626.
- 732 58 Wesolowski T, Tomialojc L. 2005 Nest sites, nest depredation, and productivity of avian broods in a  
733 primeval temperate forest: do the generalisations hold? *Journal of Avian Biology*. **36**, 361-367.
- 734 59 Wesolowski T, Martin K. 2018 Tree Holes and Hole-Nesting Birds in European and North American  
735 Forests. In *Ecology and Conservation of Forest Birds* (eds G Mikusinski, J-M Roberge, RJ Fuller), pp 79-  
736 134. Cambridge, UK: Cambridge University Press.
- 737 60 Edworthy AB, Wiebe KL, Martin K. 2012 Survival analysis of a critical resource for cavity-nesting  
738 communities: patterns of tree cavity longevity. *Ecological Applications*. **22**, 1733-1742.

61 Cockle KL, Martin K, Bodrati A. 2017 Persistence and loss of tree cavities used by birds in the subtropical Atlantic Forest. *Forest ecology and management*. **384**, 200–207.  
 62 Wesolowski T. 2011 “Lifespan” of woodpecker-made holes in a primeval temperate forest: A thirty year study. *Forest ecology and management*. **262**, 1846–1852.

743  
744

**Table 1. Species richness for forest-associated bird groups found in each of six zoogeographic regions.** In parenthesis the maximum number of species of each group found in a single 10×10 km grid cell in each region.

| <u>Zoographic region</u> | <u>Excavators</u> | <u>Secondary cavity-nesters</u> | <u>Forest specialists<sup>1</sup></u> | <u>Forest generalists<sup>1</sup></u> | <u>All forest birds (specialists + generalists)<sup>1</sup></u> |
|--------------------------|-------------------|---------------------------------|---------------------------------------|---------------------------------------|-----------------------------------------------------------------|
| <u>Nearctic</u>          | <u>42 (16)</u>    | <u>111 (41)</u>                 | <u>93 (36)</u>                        | <u>365 (111)</u>                      | <u>458 (140)</u>                                                |
| <u>Palaearctic</u>       | <u>67 (23)</u>    | <u>181 (58)</u>                 | <u>155 (65)</u>                       | <u>725 (221)</u>                      | <u>880 (276)</u>                                                |
| <u>Oriental</u>          | <u>120 (35)</u>   | <u>241 (67)</u>                 | <u>463 (79)</u>                       | <u>958 (238)</u>                      | <u>1421 (300)</u>                                               |
| <u>Neotropical</u>       | <u>173(36)</u>    | <u>373 (114)</u>                | <u>1078 (200)</u>                     | <u>1764 (277)</u>                     | <u>2842 (436)</u>                                               |
| <u>Afrotropical</u>      | <u>78 (33)</u>    | <u>218 (68)</u>                 | <u>220 (60)</u>                       | <u>911 (287)</u>                      | <u>1131 (331)</u>                                               |
| <u>Australasia</u>       | <u>14 (7)</u>     | <u>178 (70)</u>                 | <u>442 (67)</u>                       | <u>1014 (190)</u>                     | <u>1456 (226)</u>                                               |

748

<sup>1</sup>Note: these numbers do not include secondary cavity-nesters.

750  
751  
752  
753  
754  
755  
756  
757  
758  
759  
760  
761  
762  
763  
764  
765  
766  
767  
768  
769  
770  
771

1  
2  
3 772  
4 773  
5 774  
6 775  
7 776  
8 777  
9 778  
10 779  
11 780  
12 781  
13 782  
14 783  
15 784  
16 785  
17 786  
18 787  
19 788  
20 789  
21 790  
22 791  
23 792  
24 793  
25 794  
26 795  
27 796  
28 797  
29 798  
30 799  
31 800  
32 801  
33 802  
34 803  
35 804  
36 805  
37 806  
38 807  
39 808  
40 809  
41 810  
42 811  
43 812  
44 813  
45 814  
46 815  
47 816  
48 817  
49 818  
50 819  
51 820  
52 821  
53 822  
54 823  
55 824  
56 825  
57 826  
58 827  
59 828  
60 829

**Table 21. Results of generalized least square models of possible correlations between (1) excavator and secondary cavity-nester richness, (2) excavator and forest specialist bird richness, (3) excavator and forest generalistspecialist richness, (4) excavator and forest bird (specialists and generalists) richness.** Each result reflects the mean outcome of 1000 models  with 1000 randomly selected grid cell data points that include an exponential spatial covariance structure. The mean Spearman rho was calculated over the fit of each of 1000 models to a test data set.

| Zoogeographic region | Correlation | Mean Slope (Min. – Max.; SD)           | % of  models with $p < 0.05$ | Mean Spearman rho |
|----------------------|-------------|----------------------------------------|-------------------------------------------------------------------------------------------------------------------|-------------------|
| Nearctic             | 1           | 0.8 (0.4 - 1.3; 0.1)                   | 60                                                                                                                | 0.73              |
|                      | 2           | <del>1.043 (0.733 - 5.913; 0.14)</del> | <del>9763</del>                                                                                                   | <del>0.7184</del> |
|                      | 3           | <del>3.114 (2.012 - 1.645; 0.41)</del> | <del>8971</del>                                                                                                   | <del>0.7671</del> |
|                      | <u>4</u>    | <u>4.2 (2.7 - 5.7; 0.5)</u>            | <u>94</u>                                                                                                         | <u>0.81</u>       |

|              |   |                                                 |                 |        |
|--------------|---|-------------------------------------------------|-----------------|--------|
| Palearctic   | 1 | 1.1 (0.7 - 1.4; 0.1)                            | 84              | 0.78   |
|              | 2 | <del>0.64.9 (0.34.0 - 1.16.7;</del><br>0.34)    | <del>8373</del> | 0.6885 |
|              | 3 | <del>2.91.1 (2.10.8 - 1.74.1;</del><br>0.31)    | <del>823</del>  | 0.8079 |
|              | 4 | 3.5 (2.6 - 5.4; 0.4)                            | 88              | 0.80   |
| Oriental     | 1 | 0.7 (0.6 - 0.9; 0.0)                            | 100             | 0.88   |
|              | 2 | <del>1.15.7 (0.94.9 - 1.36.6;</del><br>0.13)    | 100             | 0.7286 |
|              | 3 | <del>3.51.6 (3.01.3 - 4.01.9;</del><br>0.21)    | 100             | 0.8677 |
|              | 4 | 4.6 (3.9 - 5.5; 0.2)                            | 100             | 0.83   |
| Neotropical  | 1 | 2.4 (1.9 - 3.0; 0.2)                            | 83              | 0.95   |
|              | 2 | <del>3.510.8 (9.1 - 14.0; 0.27)</del>           | <del>732</del>  | 0.957  |
|              | 3 | <del>5.24.2 (3.93.4 - 6.75.2;</del><br>0.52)    | <del>772</del>  | 0.916  |
|              | 4 | 8.8 (7.1 - 11.0; 0.6)                           | 84              | 0.96   |
| Afrotropical | 1 | 1.1 (0.7 - 1.9; 0.2)                            | 76              | 0.79   |
|              | 2 | <del>0.66.8 (0.35.0 - 1.19.8;</del><br>0.19)    | <del>783</del>  | 0.8394 |
|              | 3 | <del>5.80.9 (3.70.6 - 8.11.5;</del><br>0.91)    | <del>8479</del> | 0.9388 |
|              | 4 | 6.4 (4.3 - 9.2; 0.9)                            | 87              | 0.93   |
| Australasian | 1 | 1.8 (1.4 - 2.2; 0.1)                            | 88              | -0.14  |
|              | 2 | <del>1.77.5 (0.92.3 - 2.511.2;</del><br>0.31.3) | 100             | 0.7331 |
|              | 3 | <del>9.21.0 (7.2-0.1 - 11.22.0;</del><br>0.63)  | <del>967</del>  | 0.1969 |
|              | 4 | 11.0 (8.3 - 13.5; 0.8)                          | 99              | 0.50   |

810  
811  
812  
813  
814  
815  
816  
817  
818  
819  
820  
821  
822  
823  
824  
825  
826



827  
828 **Table 2. Results of generalized least square models of possible correlations between (1)**  
829 **woodpecker and secondary cavity-nester richness, (2) woodpecker and forest bird richness,**  
830 **and (3) woodpecker and forest specialist richness.** Each result reflects the mean outcome of  
831 1000 models build with 1000 randomly selected grid cell data points that include an exponential  
832 spatial covariance structure. The mean Spearman rho was calculated over the fit of each of 1000  
833 models to a test data set.

| <b>Zoogeographic region</b> | <b>Correlation</b> | <b>Mean Slope (Min.—Max.; SD)</b> | <b>% of models with <math>P &lt; 0.05</math></b> | <b>Mean Spearman rho</b> |
|-----------------------------|--------------------|-----------------------------------|--------------------------------------------------|--------------------------|
| Nearetic                    | 1                  | 1.0 (0.5—1.6; 0.2)                | 61                                               | 0.70                     |
|                             | 2                  | 5.3 (3.7—8.0; 0.7)                | 67                                               | 0.79                     |
|                             | 3                  | 1.7 (1.1—2.2; 0.1)                | 70                                               | 0.63                     |
| Palearctic                  | 1                  | 1.2 (0.9—2.3; 0.1)                | 81                                               | 0.79                     |
|                             | 2                  | 5.6 (4.3—8.1; 0.6)                | 73                                               | 0.83                     |
|                             | 3                  | 1.3 (0.9—2.0; 0.2)                | 82                                               | 0.73                     |
| Oriental                    | 1                  | 1.0 (0.8—1.3; 0.1)                | 100                                              | 0.88                     |
|                             | 2                  | 7.9 (6.6—9.8; 0.5)                | 100                                              | 0.88                     |
|                             | 3                  | 2.2 (1.7—2.6; 0.1)                | 100                                              | 0.80                     |
| Neotropical                 | 1                  | 3.3 (2.4—4.9; 0.4)                | 68                                               | 0.94                     |
|                             | 2                  | 14.3 (10.8—20.5; 1.6)             | 67                                               | 0.93                     |
|                             | 3                  | 5.2 (3.9—6.6; 0.5)                | 73                                               | 0.88                     |
| Afrotropical                | 1                  | 1.6 (0.9—3.5; 0.4)                | 72                                               | 0.74                     |
|                             | 2                  | 9.9 (6.4—19.6; 1.9)               | 69                                               | 0.86                     |
|                             | 3                  | 1.3 (0.7—3.2; 0.3)                | 80                                               | 0.81                     |
| Australasian                | 1                  | 1.9 (-0.1—4.4; 0.6)               | 81                                               | -0.33                    |
|                             | 2                  | 8.6 (1.2—21.8; 2.4)               | 75                                               | -0.30                    |
|                             | 3                  | 3.9 (-0.2—9.0; 1.2)               | 96                                               | -0.08                    |

834  
835  
836  
837  
838  
839  
840  
841  
842  
843  
844  
845  
846  
847  
848  
849  
850

1  
2  
3 851  
4 852 **Figure legends**

5  
6 853  
7  
8 854 **Figure 1. Global map of the relative richness of tree cavity excavators versus secondary**  
9 **cavity-nesting birds (expressed as the ratio excavator / secondary cavity-nester) in 10x10**  
10 **km grid cells.** Low values (light colors) indicate relatively low numbers of excavators as  
11 compared to secondary cavity-nesters ~~(or, inversely, relatively high numbers of secondary~~  
12 ~~cavity-nesters)~~ while high values (dark colors) indicate a relatively higher proportion of  
13 excavators to secondary cavity-nesters.  
14 859

15  
16 860  
17  
18 861 **Figure 2. Scatter plots of the correlations between the richness (number of species) of**  
19 **excavators and secondary cavity-nesters all forest birds (upper row), all-forest specialists**  
20 **(second middle row), forest generalists (third row) and all non-cavity-nesting forest birds**  
21 **(specialists and generalists; excavating cavity-nesters (bottom row) in six zoogeographic**  
22 **regions.** Points represent species richness values in 10x10 km grid cells, and the solid line  
23 represents the fit of a linear regression model, created using all grid cell values. Note that nearly  
24 all secondary cavity-nesters are also forest-associated species, but were not included as forest  
25 specialists or generalists.  
26 868

27  
28 869  
29 870  
30 871  
31 872  
32 873  
33 874  
34 875  
35 876  
36 877  
37 878  
38 879  
39 880  
40 881  
41 882  
42 883  
43 884  
44 885  
45 886  
46 887  
47  
48  
49



**Figure 1.**

888  
889  
890  
891  
892  
893  
894  
895  
896  
897  
898  
899  
900  
901  
902  
903  
904  
905  
906  
907  
908  
909  
910  
911  
912  
913

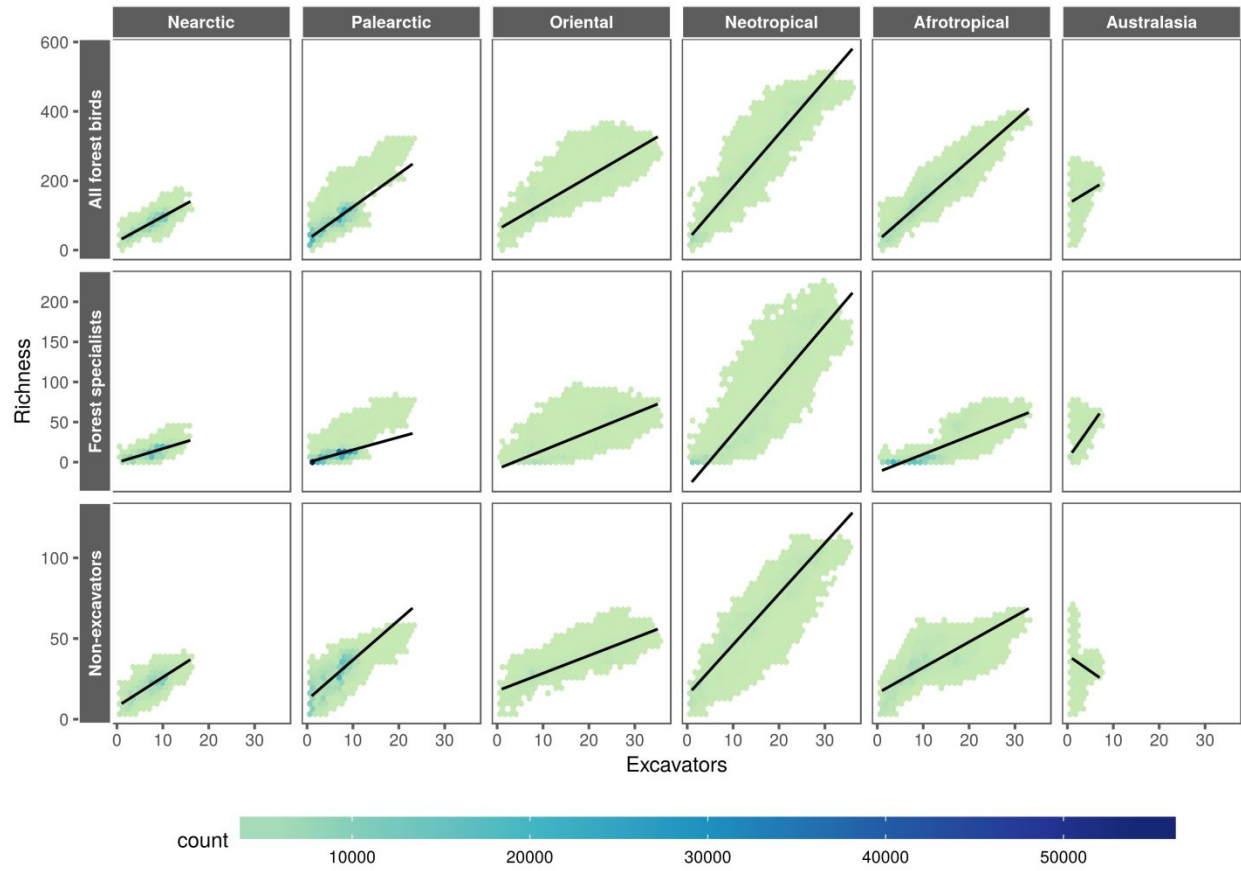

914

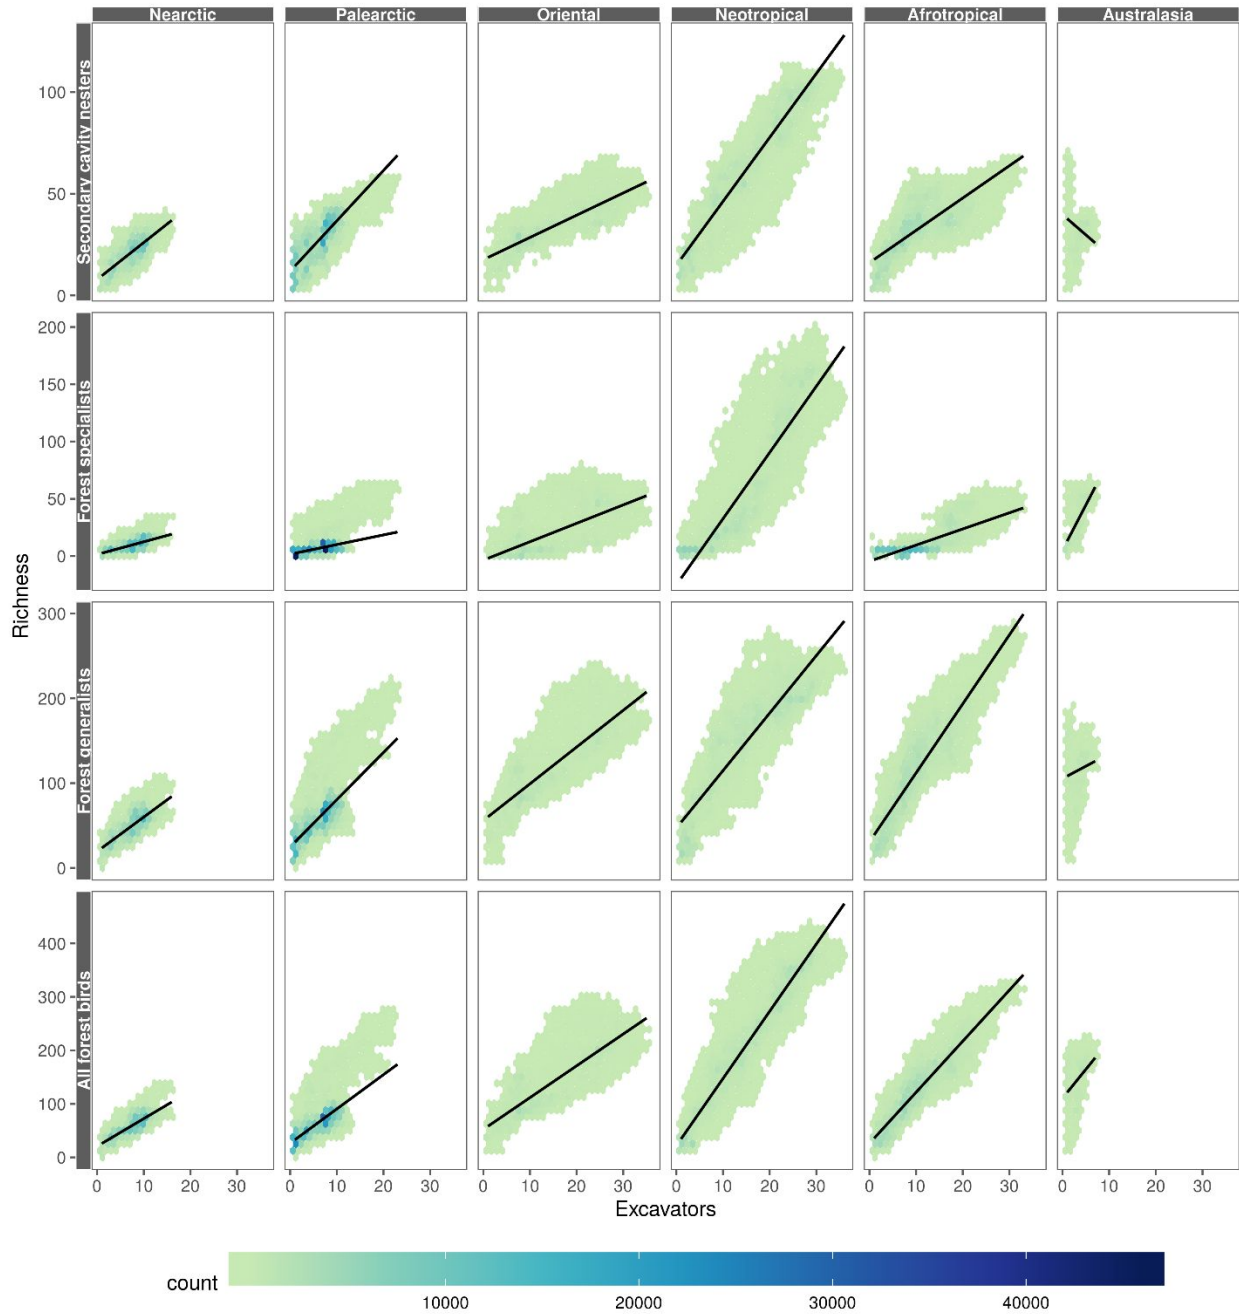

915  
916 **Figure 2.**

917  
918  
919  
920  
921  
922  
923  
924  
925

1  
2  
3  
4  
5  
6  
7  
8  
9  
10  
11  
12  
13  
14  
15  
16  
17  
18  
19  
20  
21  
22  
23  
24  
25  
26  
27  
28  
29  
30  
31  
32  
33  
34  
35  
36  
37  
38  
39  
40  
41  
42  
43  
44  
45  
46  
47  
48  
49  
50  
51  
52  
53  
54  
55  
56  
57  
58  
59  
60926  
927  
928  
929  
930  
931  
932  
933  
934  
935  
936  
937  
938  
939  
940  
941  
942  
943  
944  
945  
946  
947  
948  
949  
950  
951  
952  
953  
954  
955  
956  
957  
958  
959  
960  
961  
962  
963  
964  
965  
966  
967  
968

1. Styring, A.R. and M.Z. bin Hussin, *Effects of logging on woodpeckers in a Malaysian rain forest: the relationship between resource availability and woodpecker abundance*. Journal of Tropical Ecology, 2004. **20**(5): p. 495-504.
2. Fischer, J., J. Stott, and B.S. Law, *The disproportionate value of scattered trees*. Biological Conservation, 2010. **143**(6): p. 1564-1567.
3. Lindenmayer, D.B., et al., *Interacting factors driving a major loss of large trees with cavities in a forest ecosystem*. PLoS One, 2012. **7**(10).
4. Gibbons, P., et al., *Hollow selection by vertebrate fauna in forests of southeastern Australia and implications for forest management*. Biological Conservation, 2002. **103**(1): p. 1-12.

1  
2  
3 1 Title: Global relationships between tree-cavity excavators and forest bird richness  
4 2

5 3 Running title: Excavator and forest bird relationships  
6 4

7 5 Yntze van der Hoek<sup>1,2\*</sup>, Gabriel V. Gaona<sup>1</sup>, Michał Ciach<sup>3</sup> and Kathy Martin<sup>4,5</sup>  
8 6

9 7 <sup>1</sup> Universidad Regional Amazónica Ikiam, Vía Muyuna, Kilómetro 7, Tena, Ecuador.  
10 8

11 9 <sup>2</sup> The Dian Fossey Gorilla Fund International, Musanze, Rwanda.  
12 10

13 11 <sup>3</sup> Department of Forest Biodiversity, University of Agriculture, al. 29 Listopada 46, 31-425  
14 12 Kraków, Poland.

15 13 <sup>4</sup> Department of Forest and Conservation Sciences, University of British Columbia, 2424 Main  
16 14 Mall, Vancouver, British Columbia V6T 1Z4 Canada.

17 15 <sup>5</sup> Environment and Climate Change Canada, 5421 Robertson Road, R.R. 1, Delta, British  
18 16 Columbia V4K 3N2, Canada.  
19 17

20 18 \*Corresponding author: yntzevanderhoek@gmail.com  
21 19  
22 20  
23 21  
24 22  
25 23  
26 24  
27 25  
28 26  
29 27  
30 28  
31 29  
32 30  
33 31  
34 32  
35 33  
36 34  
37 35  
38 36  
39 37  
40 38  
41 39  
42 40  
43 41  
44 42  
45 43  
46 44  
47 45  
48 46  
49 47  
50 48  
51 49  
52 50  
53 51  
54 52  
55 53  
56 54  
57 55  
58 56  
59 57  
60 58

**Abstract**

Global monitoring of biodiversity and ecosystem change can be aided by the effective use of indicators. Tree-cavity excavators, the majority of which are woodpeckers (Picidae), are known to be useful indicators of the health or naturalness of forest ecosystems and the diversity of forest birds. They are indicators of the latter due to their associations with particular forest elements and because of their role in facilitating the occurrence of other species through the provision of nest cavities. Here, we investigated whether these positive correlations between excavators and other forest birds are also found at broad geographical scales. We used global distribution maps to extract richness estimates of tree-cavity nesting and forest-associated birds, which we grouped by zoogeographic regions. We then created generalized least squares models to assess the relationships between these groups of birds. We show that richness of tree-cavity excavating birds correlates positively with that of all forest birds and cavity-nesters at global scales, but with variation across zoogeographic regions. As many excavators are relatively easy to detect, play keystone roles at local scales, and are effective management targets, we propose that excavators are useful for biodiversity monitoring across multiple spatial scales and geographic regions, especially in the tropics.

**Keywords**

Facilitator species, Indicator species, Management surrogates, Secondary cavity-nesting birds, Picidae, Species interactions



## 93 Introduction

94 Forests worldwide are facing increasing anthropogenic pressures, with both a rapid decline in the  
95 surface area of natural forests and a decrease in the naturalness of forests as a result [1, 2]. In  
96 turn, these reductions of high-quality forest habitats have led to a loss of forest-associated  
97 biodiversity [3-5]. To monitor these changes in forest ecosystems and their denizens, we often  
98 look at specialized animals that require the availability of specific habitat structures and  
99 processes across long temporal and large spatial scales [6], such as birds that respond not only to  
100 a loss in overall forest cover but also to a change in forest health, quality, and integrity [7-10].  
101 Excavators such as woodpeckers, barbets, nuthatches, trogons and certain parrot species—among  
102 which woodpeckers are the most numerous group [11]—may be especially effective indicators  
103 due to their associations with particular forest elements and their role in facilitating the presence  
104 of other species through the provision of nest cavities. Indeed, there is empirical evidence that  
105 their presence can be indicative of the state of both the forest (e.g., the presence of large trees  
106 [12], heterogeneous forest structure [13], or a high level of naturalness [14-18]) as well as the  
107 richness and abundance of other forest-associated species [19-21]. However, we may question  
108 whether excavators are universally effective indicators, especially of biodiversity, in all  
109 geographic regions of the globe or all forest types. For example, excavators are better predictors  
110 of richness and abundance of other forest birds residing in deciduous versus coniferous forests of  
111 certain parts of hemiboreal Europe [15].

112 If relationships between excavators and other forest-associated biota are universally  
113 positive in nature, and common not only at stand- and landscape-scales but hold across large  
114 geographic regions, then excavators could form a unique group of indicators that may be  
115 effective across multiple locations and spatial scales [22]. To find species that are effective as  
116 both indicator and management surrogates across multiple regions would be especially useful in  
117 the largely understudied tropics where comprehensive biodiversity assessments are costly and  
118 logistically challenging [23]. The first signs are promising as the overwhelming majority of tree-  
119 cavity excavators are forest or woodland birds and general patterns of woodpecker richness  
120 correlate positively with the amount of forest cover at the global scale [24]. Moreover, many  
121 excavators are regarded as habitat specialists and tend to have highly specific habitat  
122 requirements which are usually met only in forests with high degrees of naturalness and low  
123 levels of human-related disturbances (e.g., logging). In fact, restoration efforts have effectively  
124 made use of woodpeckers to indicate that restoration has successfully reached a certain level of  
125 naturalness [25, 26]. Excavators often utilize large, live or decaying trees, or coarse woody  
126 debris, for nesting, roosting, and foraging, and the availability of large amounts of dead wood is,  
127 in particular, found to be important [27-30]. As a result, we find that excavators are highly  
128 responsive to local changes in forest habitat quantity, quality and the loss of certain forest  
129 elements, and may, therefore, be effective indicators of the naturalness of ecosystems (see e.g.,  
130 [31]).

131 Excavators are not only reliable indicators of other forest birds occurrence by means of  
132 their mutual associations with forest characteristics, but correlations between both groups of  
133 birds are also partially determined by species interactions. Taken together, these ‘nest-webs’ [32]  
134 of interacting species are structured by the availability and acquisition of tree-cavities formed by  
135 two major processes: ‘fungal formation’, in which fungi decompose wood over an extended  
136 period, or animal excavation [33, 34]. Since most excavators—at least the majority of  
137 woodpeckers—excavate a new nest cavity each year, this mode of cavity creation steadily  
138 provides a large number of potential sheltered roosting and nesting sites available to secondary-

1  
2  
3 139 users: both for vertebrates [34] and invertebrates [35, 36], as well as for maintenance of diverse  
4 140 fungal assemblages [37]. As a result, cavity formation by excavation is an important source of  
5 141 nest holes for species in many regions of the world, especially in North America [34]. However,  
6 142 decay-formed cavities have been shown to be more important nest sites in other regions,  
7 143 especially in the tropics [33]. Thus, it is very likely that the relative importance of both processes  
8 144 of cavity formation—and thus the strength of the relationship between excavator richness and  
9 145 secondary cavity-nester richness—varies globally [34]. In addition, excavators can aid in the  
10 146 dispersal of fungi, which in turn enhances processes of wood softening and the formation of  
11 147 decay-formed cavities [38]. It is worth noting that excavators play additional roles (beyond the  
12 148 direct provision of cavities) that may facilitate other species that are not necessarily cavity-  
13 149 nesters. For example, as excavators perforate the bark of trees they may expose insects or sap for  
14 150 other species to forage on [39, 40].

15 151 Excavators have been shown to be reliable indicators of forest-bird diversity and richness  
16 152 at the stand or landscape-levels [9, 19]. It is unclear if this relationship scales up across larger  
17 153 regions or holds across the globe given indications that interactions between cavity-nesting birds  
18 154 may vary spatially (e.g., [41]) as well as the notion that certain dominant groups of excavators  
19 155 (woodpeckers, in particular) vary in richness across zoogeographic regions [11]. The aim of the  
20 156 present study is to investigate whether there are consistent patterns in the relationships between  
21 157 avian tree-cavity excavators (hereafter: excavators) and species richness of non-excavating tree-  
22 158 cavity nesting birds (hereafter: secondary cavity-nesters), or non-cavity nesting forest birds  
23 159 (forest specialist and generalists species), across the globe. If previously observed relationships  
24 160 between cavity-excavators and other forest birds scale up from local forest stands [17] or  
25 161 ecosystems [19] to zoogeographic or global levels, then this strengthens the potential value of  
26 162 tree cavity-excavators as both indicators and management surrogates.

27 163 Given the important potential indicator role of excavators in forest ecosystems across the  
28 164 world, we predict a global tendency for richness of secondary cavity-nesters, forest specialists,  
29 165 forest generalists and overall forest birds (specialists + generalists) to increase in correlation with  
30 166 the number of excavators present in the ecosystem, regardless of the ecosystem or location.  
31 167 However, we also predict that the nature (e.g., the strength and slope of correlations) of the  
32 168 relationships between excavators and richness of other forest birds will vary across  
33 169 zoogeographic regions, reflecting differences in forest characteristics (e.g., deciduous vs.  
34 170 coniferous forests), forest management practices (e.g., forests being more or less intensively  
35 171 managed), and bird communities (e.g., the relative richness of different groups of forest-  
36 172 associated birds), some aspects of which are previously discussed by e.g., Cockle et al. [34]. In  
37 173 particular, we predict that correlations between excavators and secondary cavity-nesters would  
38 174 be particularly strong in regions with relatively low overall avian diversity and slow processes of  
39 175 decay-related tree-cavity formation. In such regions predominantly temperate and boreal regions,  
40 176 particularly the Nearctic and Palearctic, relationships between excavators and secondary cavity-  
41 177 nesters would be driven by mutual associations with particular forest elements but enhanced by  
42 178 direct interactions through the provision of nest cavities, as a lack of available decay-formed  
43 179 cavities may increase the dependence of secondary-cavity nesters on excavated cavities. In  
44 180 contrast, for regions that largely span the tropics, such as the Neotropics, Afrotropics, and  
45 181 Oriental regions, we predict weaker, though still positive, correlations between excavators and  
46 182 secondary cavity-nesters as these relationships would be driven mainly by mutual associations  
47 183 with particular forest elements and less by direct interactions through the provision of nest  
48 184 cavities—decay-formed cavities being more prevalent here. Similarly, we also predict that

185 relationships between excavators and secondary cavity-nesters are stronger than those between  
186 excavators and non-cavity-nesting forest birds (specialists or generalists) in the Nearctic and  
187 Palearctic, but that there is no such clear pattern of differences in strength of correlations for the  
188 tropical regions. For Australasia, where the largest group of excavators (woodpeckers) is notably  
189 absent, we predict relationships between the present excavators, often weaker excavators that  
190 require softer or rotting wood (see [11] for species), and other groups of birds to be relatively  
191 weak and to be based mainly on certain shared habitat preferences. Finally, for all regions, we  
192 predict that relationships between excavators and secondary cavity-nesters and between  
193 excavators and forest specialists are stronger than those between excavators and forest  
194 generalists, as the latter group includes species that are unlikely to have either direct interactions  
195 or mutually shared habitat preferences with excavators. In fact, many generalist forest birds may  
196 have traits (e.g., ground-nesting behaviour and a preference for early-successional forests with  
197 small trees [41]) that can lead to habitat requirements opposite from those required by  
198 excavators.

### 200 **Material and Methods**

201 We used published global distribution maps of tree-cavity nesting birds [11] and forest birds [42]  
202 to extract richness estimates per 10×10 km grid cell (Table 1). Maps for both tree-cavity nesters  
203 and forest birds were based on the same species range maps provided by BirdLife International  
204 and NatureServe [43]. We selected and classified focal bird species following [11, 42] as 1)  
205 excavators (species that are known to often or always excavate their own nesting cavities), 2)  
206 secondary cavity-nesters: birds which are known to nest in tree cavity but which never or rarely  
207 excavate their own cavity, 3) forest specialists: birds that exclusively use forest habitat, and 4)  
208 forest birds: birds that use forest habitat but also at least one other type of habitat. We note that  
209 some species were counted in more than one category (e.g., a species that is a ‘forest specialist’  
210 is per definition also counted as a ‘forest bird’). However, excavators were never counted in any  
211 other category.

212 We used only range polygons where a species’ presence was classified as ‘Extant’ or  
213 ‘Probably extant’, and assigned ‘presence’ to all grid cells that overlapped with range polygons.  
214 Next, we created generalized least squares (gls) models to assess the linear relationships between  
215 excavators and other categories of forest-associated birds. To take biogeographical differences  
216 into account, we proceeded to separate trends across the globe and created gls models for the six  
217 zoogeographic regions separately: Nearctic, Palearctic, Neotropical, Afrotropical, Oriental, and  
218 Australasia. We did not restrict our analyses to forested regions, wanting to avoid making  
219 subjective decisions on the classification of a grid cell to a specific vegetation/habitat type. Yet,  
220 to ensure we looked for possible relationships between these forest-associated species in regions  
221 they actually occur, we removed cells with zero excavators and cells where the numbers of  
222 secondary cavity-nesters, forest specialists, or all forest birds were lower than that of excavators  
223 from further analyses.

224 Our data were spatially structured (i.e., high and low richness of birds in different  
225 categories (excavators etc.) was spatially clustered) across and within zoogeographic regions, as  
226 demonstrated by the global distribution of the relative number of cavity excavators to non-  
227 excavating cavity-nesting birds (expressed as the ratio of excavator / non-excavating cavity-  
228 nester; Fig. 1). Thus, we followed similar protocols to adjust for spatial autocorrelation as per  
229 Storch et al. [44]. This implied the use of gls models with excavator richness as a predictor  
230 variable, the richness of one of the categories of forest-associated birds as a response variable,

231 and a variable exponential spatial covariance structure, as these models had the best fit in  
232 preliminary tests, which reduced—rather than eliminated—the influence of spatial  
233 autocorrelation on our models. In these tests, exponential gls models consistently had the lowest  
234 Akaike’s Information Criterion (AIC) value compared to a set of models, including an ordinary  
235 least squares model with no spatial structure, and gls models with Gaussian, linear, rational  
236 quadratics and spherical spatial covariance structures.

237 Even though gls models work well with large datasets, we found that gls models fitted on  
238 all data failed to converge (using the R package “nlme” [45]). To circumvent this computational  
239 problem, we first grouped grid cells by zoogeographic region. We thereafter ran 1000 models on  
240 bootstrap permutations of 1000 randomly selected grid cells (see [24, 46]). Of these 1000 model  
241 iterations, we subsequently calculated the mean ( $\pm$ SD), minimum and maximum coefficients of  
242 the regression slope. As gls models do not provide a measure of the strength of relationships, we  
243 proceeded with a different measure of the strength of each correlation: fitting each exponential  
244 gls model to a different, non-overlapping, test data set of 1000 randomly selected grid cells. We  
245 then proceeded to calculate the Spearman rho coefficient of the correlation between predicted  
246 and observed data, for all 1000 models per zoogeographic region. Finally, we calculated the  
247 mean Spearman rho of all significant models per zoogeographic region. We repeated all of these  
248 analyses for woodpeckers as a subset of the excavators, with the notable exception of analyses  
249 for Australasia where woodpeckers are absent. All data, R scripts, and initial results needed to  
250 reproduce our analyses presented here are deposited online (Appendix S1).

251

## 252 Results

253 Using gls modelling to assess the global patterns for the relationships between excavator richness  
254 and that of secondary cavity-nesters, forest specialists, and all forest birds, we found positive  
255 relationships between all pairs of comparisons. However, these relationships differed in relative  
256 strength and characteristics (e.g., steepness of regression slope) depending on the group of birds  
257 and zoogeographic region analysed (Fig. 2, Table 2). We found stronger relationships (higher  
258 Spearman rho) in the predominantly tropical Afrotropical, Oriental, and Neotropical regions than  
259 in the comparably more temperate/boreal Nearctic and Palearctic regions, and particularly weak  
260 relationships in Australasia.

261 The relationships between excavators and the other three groups of cavity-nesting and  
262 forest-associated birds were generally similar in nature (positive), without clear evidence for our  
263 prediction that the relationship between excavators and other cavity-nesters would be stronger  
264 than that between excavators and larger groups of forest-associated birds that include non-cavity-  
265 nesters (forest specialists or all forest birds). Instead, we found that differences in the relative  
266 strength of these relationships (between excavators and the three groups of forest-associated  
267 birds) differed largely across zoogeographic regions. For example, excavator richness was a  
268 particularly strong predictor of secondary cavity-nester richness and of all forest birds in the  
269 Oriental region ( $\rho = 0.88$ ), and slightly less so for forest specialists ( $\rho = 0.72$ ), whereas  
270 excavator richness in the Afrotropics showed a strong relationship with forest specialists ( $\rho =$   
271  $0.83$ ), forest generalists ( $\rho = 0.91$ ) and all forest birds taken together ( $\rho = 0.93$ ), but a  
272 somewhat weaker association with secondary cavity-nesters ( $\rho = 0.79$ ). Finally, we note that  
273 excavators in Australasia (which include no woodpeckers) showed a moderately strong ( $\rho =$   
274  $0.73$ ) and significant ( $p < 0.05$  in 100 percent of model iterations) positive relationship with  
275 forest specialists, and none with secondary cavity-nesters or more generalist forest birds.

1  
2  
3 276 We repeated all analyses for woodpeckers as a subset of excavators and found nearly  
4 277 identical results. We list results of these analyses in supplementary Table S1.  
5 278

## 6 279 **Discussion**

7 280 We found strong positive relationships between excavators and secondary cavity-nesters, forest  
8 281 specialists, forest generalists and overall forest birds at all zoogeographic scales, although these  
9 282 relationships differed in both strength and characteristics (regression slopes) across  
10 283 zoogeographic regions. Moreover, we found that it depended on the region whether relationships  
11 284 between excavators and secondary cavity-nesters were stronger or weaker than those between  
12 285 excavators and non-cavity-nesting forest birds, but that relationships between excavators and  
13 286 non-cavity-nesting forest birds were particularly strong in most regions (e.g., the relationship  
14 287 between excavators and all forest birds was the stronger than that between excavators and  
15 288 secondary cavity-nesters in the Nearctic, Palearctic, Neotropical, and Afrotropical regions). This  
16 289 indicates that the influence of direct facilitation of nest-cavities is likely less important than the  
17 290 indirect associations with forest elements and shared habitat preferences in shaping these  
18 291 relationships, but that the relative importance of both depends on the region under consideration.  
19 292 Our results imply that excavators and woodpeckers (a predominant subset of excavators) hold  
20 293 potential as indicator and management surrogates across most of the world [47], with the  
21 294 possible exception of the Australasian region, but also that we need to take differences among  
22 295 zoogeographic regions into account (e.g., in the composition of local and regional nest-webs with  
23 296 regards to the relative numbers of excavators and secondary cavity-nesters as seen in Fig. 1) if  
24 297 we are to adopt these as surrogates for conservation or management.

25 298 We did not find support for the prediction that relationships between excavators and  
26 299 secondary-cavity nesters are relatively stronger in temperate and boreal regions (Nearctic and  
27 300 Palearctic), which would reflect the additional importance of cavity facilitation in these regions  
28 301 as compared to more tropical regions. In general, excavated tree cavities are less likely to be used  
29 302 by secondary-cavity nesters in the tropics as high rates of precipitation and temperature lead to a  
30 303 lower persistence (i.e., longevity) of excavated cavities [34] and to the relatively rapid formation  
31 304 of cavities through fungal activity [48]. This, in turn, leads to relatively higher use of decay-  
32 305 formed cavities by secondary cavity-nesters in the tropics [34, 49], and less dependence on  
33 306 excavators for the supply of nest-cavities. For example, even woodpeckers will occasionally use  
34 307 decay-formed cavities in Neotropical temperate rainforests where tree decay is the key driver of  
35 308 nest-web structure [49]. Indeed, we see that the relationship between excavators and secondary  
36 309 cavity-nesters is equally strong (Neotropics) or even weaker (Afrotropics) than those between  
37 310 excavators and non-cavity-nesting forest birds (specialists or generalists), in two of these mainly  
38 311 tropical regions. But we also found that the relationship between excavators and secondary  
39 312 cavity-nester was relatively strong in the Oriental region, stronger in fact than those between  
40 313 excavators and any other group of forest birds. This may be the result of the specific  
41 314 characteristics of the forests or avifaunal communities in this region but may also be influenced  
42 315 by relatively high logging rates in the Oriental region. Logging reduces the availability of large  
43 316 dead trees, which in turn diminishes substrate availability for excavators as well as the  
44 317 opportunity for cavities to form via decay [50], potentially making secondary cavity-nesters  
45 318 more dependent on excavated cavities.

46 319 In contrast to our predictions, relationships between excavators and secondary cavity-  
47 320 nesters and between excavators and forest specialists were not necessarily stronger (though this  
48 321 was the case in the Neotropical region) than those between excavators and forest generalists. We  
49 322

do not have a clear explanation for this finding, though we argue that forest generalists and excavators might share landscapes where forest specialists are hard to find, for example in open landscapes with scattered trees [51]. Finally, we found that regardless of the relationship, all relationships between excavators and other bird groups were stronger in the more tropical (especially the Afrotropical and Neotropical) regions, with the exception of Australasia (see below), than in the temperate and boreal regions. Arguably, excavators are particularly strong indicators of other bird groups in these tropical regions as these regions still contain vast tracts of unlogged and unmanaged forests, a topic for further research.

Relationships between excavators and all forest-associated bird groups were less evident in Australasia, which is a region that differs largely from all others in both avifauna (e.g., there are no woodpeckers here but there is a relatively high richness of cavity-nesters [11]) and forest structure and dynamics (e.g., cavity densities in Australasian forests are among the highest globally [47]). Specifically, we found a moderately strong relationship between excavators and non-cavity-nesting forest specialists in Australasia, but no such relationships between excavators and secondary-cavity nesters or forest birds with broader habitat requirements (i.e., forest generalists). This could indicate that the excavators in this region (which notably excludes woodpeckers) show a preference for forest conditions (e.g., the provision of trees that are in advanced stages of decay, given that many of these excavators are weaker excavators that require softer or rotting wood; see [11] for species) that are shared by many forest specialists. In contrast, secondary cavity-nesters in Australasia may depend on elements not formed, or particularly required, by excavators (e.g., large trees of a certain age [52] that contain many dead branches and have accumulated multiple decay-formed cavities [53]).

Beyond variation in the strength of relationships between regions we also found that regressions differed in slopes, both across regions and across the different relationships tested. For example, the steep slopes we found for correlations between excavators and non-cavity-nesting forest birds in the predominantly tropical Neotropical region contrast with more shallow slopes in the temperate/boreal Palearctic and Nearctic regions. And, within the Neotropical region, the relationship between excavators and secondary cavity-nesters showed shallower slopes than that between excavators and non-cavity-nesting forest birds. These differences in slopes mainly reflect differences in species richness across regions and groups of forest birds, with relatively steeper slopes representing a relatively larger increase in richness of a particular group of birds per increase in the number of excavators. In turn, we may look at macro-scale processes (e.g., as outlined by Gaston [54]), such as speciation events, that drive these differences across regions in overall richness of birds [55], including cavity-nesting birds [11], and other possible factors (e.g., trees as potential substrates for cavities may also differ across regions [56]).

In conclusion, we found strong and positive relationships between excavator and forest bird richness around most of the world. As such, we deem excavators to be useful indicator species for forest bird diversity at broad spatial scales, as was previously demonstrated at stand- and landscape-scales. Excavators, especially woodpeckers, form a small and fairly easy to identify (even by citizen scientists) subset of a larger group of species (forest birds) often studied to understand the effects of anthropogenic disturbances. Moreover, many woodpeckers respond to playbacks, which may, therefore, become an effective survey tool that allows researchers to survey relatively large areas fairly readily (e.g., [57]). Studies of excavator presence and abundance, especially in high biodiversity tropical regions, might provide quick measures of forest quality and biodiversity, which may in turn guide forest management decisions (e.g.,

1  
2  
3 368 improving the retention of large trees). A comprehensive study of all forest birds in some regions  
4 369 like the Amazon or Congo Basin (where, notably, there are hotspots of woodpecker richness  
5 370 [58,59]) would require considerable local expertise and training, which is often difficult to  
6 371 achieve due to social and monetary limitations. Thus, we conclude, excavators have excellent  
7 372 potential as study subjects for conservation monitoring and planning initiatives (see also [59]  
8 373 with regards to woodpecker conservation itself), in comparative research, and to guide the  
9 374 establishment of region-wide forest conservation strategies, especially in the largely  
10 375 understudied tropical regions of the world.  
11  
12 376

### 13 377 **Ethics statement**

14 378 No field data were obtained nor human or animal subjects used for this study.  
15 379

### 16 380 **Data accessibility**

17 381 Supporting data as well as R scripts can be found on The GitLab repository  
18 382 [https://gitlab.com/gavg712/CB\\_cavity\\_nesters](https://gitlab.com/gavg712/CB_cavity_nesters), the details of which are outlined in Appendix S1.  
19 383

### 20 384 **Competing interests**

21 385 We have no competing interests.  
22 386

### 23 387 **Authors' contributions**

24 388 YH and GVG carried out the data analysis, and led the design of the study and writing of the  
25 389 manuscript; MC and KM critically revised the manuscript. All authors contribute to the writing  
26 390 of the final manuscript, gave final approval for publication and agree to be held accountable for  
27 391 the work performed therein.  
28 392

### 29 393 **Acknowledgments**

30 394 We would like to thank Lisa Manne, and Kristina Cockle and two anonymous reviewers for their  
31 395 critical remarks on drafts of this article.  
32 396

### 33 397 **Funding**

34 398 This research was not externally funded.  
35 399

### 36 400 **References**

- 37 401 1 Allan JR, Venter O, Maxwell S, Bertzky B, Jones K, Shi Y, Watson JE. 2017 Recent increases in human  
38 402 pressure and forest loss threaten many Natural World Heritage Sites. *Biological conservation*. **206**, 47-  
39 403 55.  
40 404 2 Hansen MC, Stehman SV, Potapov PV. 2010 Quantification of global gross forest cover loss.  
41 405 *Proceedings of the National Academy of Sciences*. **107**, 8650-8655.  
42 406 3 Barlow J, Lennox GD, Ferreira J, Berenguer E, Lees AC, Mac Nally R, Thomson JR, de Barros Ferraz SF,  
43 407 Louzada J, Oliveira VHF. 2016 Anthropogenic disturbance in tropical forests can double biodiversity loss  
44 408 from deforestation. *Nature*. **535**, 144.  
45 409 4 Gaston KJ, Blackburn TM, Goldewijk KK. 2003 Habitat conversion and global avian biodiversity loss.  
46 410 *Proceedings of the Royal Society of London. Series B: Biological Sciences*. **270**, 1293-1300.  
47 411 5 Betts MG, Wolf C, Pfeifer M, Banks-Leite C, Arroyo-Rodríguez V, Ribeiro DB, Barlow J, Eigenbrod F,  
48 412 Faria D, Fletcher RJ. 2019 Extinction filters mediate the global effects of habitat fragmentation on  
49 413 animals. *Science*. **366**, 1236-1239.

- 1  
2  
3 414 6 Carignan V, Villard M-A. 2002 Selecting indicator species to monitor ecological integrity: a review.  
4 415 *Environmental monitoring and assessment*. **78**, 45-61.
- 5 416 7 Canterbury GE, Martin TE, Petit DR, Petit LJ, Bradford DF. 2000 Bird communities and habitat as  
6 417 ecological indicators of forest condition in regional monitoring. *Conservation Biology*. **14**, 544-558.
- 7 418 8 Venier LA, Pearce JL. 2004 Birds as indicators of sustainable forest management. *The Forestry*  
8 419 *Chronicle*. **80**, 61-66.
- 9 420 9 Martin K, Ibarra JT, Drever M. 2015 Avian surrogates in terrestrial ecosystems: theory and practice. In  
10 421 *Indicators and surrogates of biodiversity and environmental change* (eds D Lindenmayer, P Barton, J  
11 422 Pierson), pp 33-44. Melbourne & London: CSIRO Publishing & CRC Press.
- 12 423 10 Ibarra JT, Martin M, Cockle KL, Martin K. 2017 Maintaining ecosystem resilience: functional  
13 424 responses of tree cavity nesters to logging in temperate forests of the Americas. *Scientific reports*. **7**,  
14 425 4467.
- 15 426 11 van der Hoek Y, Gaona GV, Martin K. 2017 The diversity, distribution and conservation status of the  
16 427 tree-cavity-nesting birds of the world. *Diversity and Distributions*. **23**, 1120-1131.
- 17 428 12 McClelland BR, McClelland PT. 1999 Pileated woodpecker nest and roost trees in Montana: links with  
18 429 old-growth and forest "health". *Wildlife Society Bulletin*. 846-857.
- 19 430 13 Stachura-Skierczyńska K, Kosiński Z. 2016 Do factors describing forest naturalness predict the  
20 431 occurrence and abundance of middle spotted woodpecker in different forest landscapes? *Ecological*  
21 432 *Indicators*. **60**, 832-844.
- 22 433 14 Marchetti M. 2005 *Monitoring and indicators of forest biodiversity in Europe: from ideas to*  
23 434 *operationality*. Joensuu, Finland: European Forest Institute.
- 24 435 15 Roberge J-M, Angelstam P. 2006 Indicator species among resident forest birds—a cross-regional  
25 436 evaluation in northern Europe. *Biological Conservation*. **130**, 134-147.
- 26 437 16 Virkkala R. 2006 Why study woodpeckers? The significance of woodpeckers in forest ecosystems.  
27 438 *Annales Zoologici Fennici*. 82-85.
- 28 439 17 Drever MC, Aitken KE, Norris AR, Martin K. 2008 Woodpeckers as reliable indicators of bird richness,  
29 440 forest health and harvest. *Biological conservation*. **141**, 624-634.
- 30 441 18 Drever MC, Martin K. 2010 Response of woodpeckers to changes in forest health and harvest:  
31 442 Implications for conservation of avian biodiversity. *Forest Ecology and Management*. **259**, 958-966.
- 32 443 19 Mikusiński G, Gromadzki M, Chylarecki P. 2001 Woodpeckers as indicators of forest bird diversity.  
33 444 *Conservation Biology*. **15**, 208-217.
- 34 445 20 Angelstam PK, Bütler R, Lazdinis M, Mikusiński G, Roberge J-M. 2003. Habitat thresholds for focal  
35 446 species at multiple scales and forest biodiversity conservation—dead wood as an example. *Annales*  
36 447 *Zoologici Fennici*. 473-482.
- 37 448 21 Nilsson SG, Hedin J, Niklasson M. 2001 Biodiversity and its assessment in boreal and nemoral forests.  
38 449 *Scandinavian Journal of Forest Research*. **16**, 10-26.
- 39 450 22 Hess GR, Bartel RA, Leidner AK, Rosenfeld KM, Rubino MJ, Snider SB, Ricketts TH. 2006 Effectiveness  
40 451 of biodiversity indicators varies with extent, grain, and region. *Biological Conservation*. **132**, 448-457.
- 41 452 23 Collen B, Ram M, Zamin T, McRae L. 2008 The tropical biodiversity data gap: addressing disparity in  
42 453 global monitoring. *Tropical Conservation Science*. **1**, 75-88.
- 43 454 24 Ilsøe SK, Kissling WD, Fjeldså J, Sandel B, Svenning JC. 2017 Global variation in woodpecker species  
44 455 richness shaped by tree availability. *Journal of Biogeography*. **44**, 1824-1835.
- 45 456 25 Bell D, Hjältén J, Nilsson C, Jørgensen D, Johansson T. 2015 Forest restoration to attract a putative  
46 457 umbrella species, the white-backed woodpecker, benefited saproxylic beetles. *Ecosphere*. **6**, 1-14.
- 47 458 26 Gatica-Saavedra P, Echeverría C, Nelson CR. 2017 Ecological indicators for assessing ecological  
48 459 success of forest restoration: a world review. *Restoration ecology*. **25**, 850-857.



- 1  
2  
3 460 27 Hoyt JS, Hannon SJ. 2002 Habitat associations of black-backed and three-toed woodpeckers in the  
4 461 boreal forest of Alberta. *Canadian Journal of Forest Research*. **32**, 1881-1888.  
5 462  
6 463 28 Roberge, J. M., Angelstam, P., & Villard, M. A. (2008). Specialised woodpeckers and naturalness in  
7 464 hemiboreal forests—deriving quantitative targets for conservation planning. *Biological conservation*,  
8 465 141(4), 997-1012.  
9 466 29 Tikkanen O-P, Martikainen P, Hyvärinen E, Junninen K, Kouki J. 2006. Red-listed boreal forest species  
10 467 of Finland: associations with forest structure, tree species, and decaying wood. *Annales Zoologici*  
11 468 *Fennici*. 373-383.  
12 469 30 Bütler R, Angelstam P, Ekelund P, Schlaepfer R. 2004 Dead wood threshold values for the three-toed  
13 470 woodpecker presence in boreal and sub-Alpine forest. *Biological Conservation*. **119**, 305-318.  
14 471 31 McLaren MA, Thompson ID, Baker JA. 1998 Selection of vertebrate wildlife indicators for monitoring  
15 472 sustainable forest management in Ontario. *The Forestry Chronicle*. **74**, 241-248.  
16 473 32 Martin K, Eadie JM. 1999 Nest webs: A community-wide approach to the management and  
17 474 conservation of cavity-nesting forest birds. *Forest Ecology and Management*. **115**, 243-257.  
18 475 33 Cockle KL, Martin K, Robledo G. 2012 Linking fungi, trees, and hole-using birds in a Neotropical tree-  
19 476 cavity network: Pathways of cavity production and implications for conservation. *Forest Ecology and*  
20 477 *Management*. **264**, 210-219.  
21 478 34 Cockle KL, Martin K, Wesolowski T. 2011 Woodpeckers, decay, and the future of cavity-nesting  
22 479 vertebrate communities worldwide. *Frontiers in Ecology and the Environment*. **9**, 377-382.  
23 480 35 Tyljanakis JM, Klein AM, Lozada T, Tschardt T. 2006 Spatial scale of observation affects  $\alpha$ ,  $\beta$  and  $\gamma$   
24 481 diversity of cavity-nesting bees and wasps across a tropical land-use gradient. *Journal of Biogeography*.  
25 482 **33**, 1295-1304.  
26 483 36 Powell S, Costa AN, Lopes CT, Vasconcelos HL. 2011 Canopy connectivity and the availability of  
27 484 diverse nesting resources affect species coexistence in arboreal ants. *Journal of Animal Ecology*. **80**, 352-  
28 485 360.  
29 486 37 Jankowiak R, Ciach M, Bilański P, Linnakoski R. 2019. Diversity of wood-inhabiting fungi in  
30 487 woodpecker nest cavities in southern Poland. *Acta Mycologica*. **54**, 1126. doi:10.5586/am.1126  
31 488 38 Jusino MA, Lindner DL, Banik MT, Rose KR, Walters JR. 2016 Experimental evidence of a symbiosis  
32 489 between red-cockaded woodpeckers and fungi. *Proceedings of the Royal Society B: Biological Sciences*.  
33 490 **283**, 20160106.  
34 491 39 Bull EL, Jackson JA., 1995 Pileated Woodpecker (*Dryocopus pileatus*). In: *The birds of North America*  
35 492 (eds A Poole, F Gill). Washington DC: The Academy of Natural Sciences & The American Ornithologists'  
36 493 Union.  
37 494 40 Montellano MGN, Blendinger PG, Macchi L. 2013 Sap consumption by the White-fronted  
38 495 Woodpecker and its role in avian assemblage structure in dry forests. *The Condor*. **115**, 93-101.  
39 496 41 Ruggera RA, Schaaf AA, Vivanco CG, Politi N, Rivera LO. 2016 Exploring nest webs in more detail to  
40 497 improve forest management. *Forest Ecology and Management*. **372**, 93-100.  
41 498 42 Betts MG, Wolf C, Ripple WJ, Phalan B, Millers KA, Duarte A, Butchart SH, Levi T. 2017 Global forest  
42 499 loss disproportionately erodes biodiversity in intact landscapes. *Nature*. **547**, 441-444.  
43 500 43 BirdLife International and NatureServe 2015 *Bird species distribution maps of the world*. Cambridge  
44 501 and Arlington: BirdLife International and NatureServe.  
45 502 44 Storch D, Davies RG, Zajíček S, Orme CDL, Olson V, Thomas GH, Ding TS, Rasmussen PC, Ridgely RS,  
46 503 Bennett PM. 2006 Energy, range dynamics and global species richness patterns: reconciling mid-domain  
47 504 effects and environmental determinants of avian diversity. *Ecology Letters*. **9**, 1308-1320.  
48  
49  
50  
51  
52  
53  
54  
55  
56  
57  
58  
59  
60

- 1  
2  
3 505 45 Pinheiro J, Bates D, DebRoy S, Sarkar D, Heisterkamp S, Van Willigen B. 2017 Package 'nlme'. *Linear*  
4 506 *and Nonlinear Mixed Effects Models, version 3-1*. Available from [https://cran.r-](https://cran.r-project.org/web/packages/nlme/nlme.pdf)  
5 507 [project.org/web/packages/nlme/nlme.pdf](https://cran.r-project.org/web/packages/nlme/nlme.pdf) (accessed January 15, 2018).  
6 508 46 Kissling WD, Sekercioglu CH, Jetz W. 2012 Bird dietary guild richness across latitudes, environments  
7 509 and biogeographic regions. *Global Ecology and Biogeography*. **21**, 328-340.  
8 510 47 Hunter M, Westgate M, Barton P, Calhoun A, Pierson J, Tulloch A, Beger M, Branquinho C, Caro T,  
9 511 Gross J. 2016 Two roles for ecological surrogacy: Indicator surrogates and management surrogates.  
10 512 *Ecological Indicators*. **63**, 121-125.  
11 513 48 Remm J, Löhmus A. 2011 Tree cavities in forests—the broad distribution pattern of a keystone  
12 514 structure for biodiversity. *Forest Ecology and Management*. **262**, 579-585.  
13 515 49 Altamirano TA, Ibarra JT, Martin K, Bonacic C. 2017 The conservation value of tree decay processes as  
14 516 a key driver structuring tree cavity nest webs in South American temperate rainforests. *Biodiversity and*  
15 517 *Conservation*. **26**, 2453-2472.  
16 518 50 Styring AR, bin Hussin MZ. 2004. Effects of logging on woodpeckers in a Malaysian rain forest: the  
17 519 relationship between resource availability and woodpecker abundance. *Journal of Tropical Ecology*.  
18 520 **20**(5), 495-504.  
19 521 51 Fischer J, Stott J, Law BS. 2010. The disproportionate value of scattered trees. *Biological*  
20 522 *Conservation*. **143**(6), 1564-1567.  
21 523 52 Lindenmayer DB, Blanchard W, McBurney L, Blair D, Banks S, Likens GE, Franklin JF, Laurance WF,  
22 524 Stein JA, Gibbons P. 2012. Interacting factors driving a major loss of large trees with cavities in a forest  
23 525 ecosystem. *PLoS One*. **7**(10).  
24 526 53 Gibbons P, Lindenmayer DB, Barry SC, Tanton MT. 2002. Hollow selection by vertebrate fauna in  
25 527 forests of southeastern Australia and implications for forest management. *Biological Conservation*. **103**,  
26 528 1-12.  
27 529 54 Gaston KJ. 2000 Global patterns in biodiversity. *Nature*. **405**, 220.  
28 530 55 Blackburn TM, Gaston KJ. 1996 Spatial patterns in the species richness of birds in the New World.  
29 531 *Ecography*. **19**, 369-376.  
30 532 56 Currie DJ, Paquin V. 1987 Large-scale biogeographical patterns of species richness of trees. *Nature*.  
31 533 **329**, 326-327.  
32 534 57 Baumgardt JA, Sauder JD, Nicholson KL. 2014. Occupancy modeling of woodpeckers: maximizing  
33 535 detections for multiple species with multiple spatial scales. *Journal of Fish and Wildlife Management*.  
34 536 **5**(2), 198-207.  
35 537 58 Mikusiński G. 2006 Woodpeckers: distribution, conservation, and research in a global perspective.  
36 538 *Annales Zoologici Fennici*. 86-95.  
37 539 59 Vergara-Tabares DL, Lammertink M, Verga EG, Schaaf AA, Nori J. 2018. Gone with the forest:  
38 540 Assessing global woodpecker conservation from land use patterns. *Diversity and Distributions*. **24**, 640-  
39 541 51.  
40 542  
41 543  
42 544  
43 545  
44 546  
45 547  
46 548

**Table 1. Species richness for forest-associated bird groups found in each of six zoogeographic regions.** In parenthesis the maximum number of species of each group found in a single 10×10 km grid cell in each region.

| Zoographic region | Excavators | Secondary cavity-nesters | Forest specialists <sup>1</sup> | Forest generalists <sup>1</sup> | All forest birds (specialists + generalists) <sup>1</sup> |
|-------------------|------------|--------------------------|---------------------------------|---------------------------------|-----------------------------------------------------------|
| Nearctic          | 42 (16)    | 111 (41)                 | 93 (36)                         | 365 (111)                       | 458 (140)                                                 |
| Palaearctic       | 67 (23)    | 181 (58)                 | 155 (65)                        | 725 (221)                       | 880 (276)                                                 |
| Oriental          | 120 (35)   | 241 (67)                 | 463 (79)                        | 958 (238)                       | 1421 (300)                                                |
| Neotropical       | 173(36)    | 373 (114)                | 1078 (200)                      | 1764 (277)                      | 2842 (436)                                                |
| Afrotropical      | 78 (33)    | 218 (68)                 | 220 (60)                        | 911 (287)                       | 1131 (331)                                                |
| Australasia       | 14 (7)     | 178 (70)                 | 442 (67)                        | 1014 (190)                      | 1456 (226)                                                |

<sup>1</sup>Note: these numbers do not include secondary cavity-nesters.

583  
584 **Table 2. Results of generalized least square models of possible correlations between (1)**  
585 **excavator and secondary cavity-nester richness, (2) excavator and forest specialist richness,**  
586 **(3) excavator and forest generalist richness, (4) excavator and forest bird (specialists and**  
587 **generalists) richness.** Each result reflects the mean outcome of 1000 models build with 1000  
588 randomly selected grid cell data points that include an exponential spatial covariance structure.  
589 The mean Spearman rho was calculated over the fit of each of 1000 models to a test data set.  
590

| Zoogeographic region | Correlation | Mean Slope (Min. – Max.; SD) | % of models with $P < 0.05$ | Mean Spearman rho |
|----------------------|-------------|------------------------------|-----------------------------|-------------------|
| Nearctic             | 1           | 0.8 (0.4 - 1.3; 0.1)         | 60                          | 0.73              |
|                      | 2           | 1.0 (0.7 - 1.3; 0.1)         | 97                          | 0.71              |
|                      | 3           | 3.1 (2.0 - 4.5; 0.4)         | 89                          | 0.76              |
|                      | 4           | 4.2 (2.7 - 5.7; 0.5)         | 94                          | 0.81              |
| Palearctic           | 1           | 1.1 (0.7 - 1.4; 0.1)         | 84                          | 0.78              |
|                      | 2           | 0.6 (0.3 - 1.1; 0.3)         | 83                          | 0.68              |
|                      | 3           | 2.9 (2.1 - 4.1; 0.3)         | 82                          | 0.80              |
|                      | 4           | 3.5 (2.6 - 5.4; 0.4)         | 88                          | 0.80              |
| Oriental             | 1           | 0.7 (0.6 - 0.9; 0.0)         | 100                         | 0.88              |
|                      | 2           | 1.1 (0.9 - 1.3; 0.1)         | 100                         | 0.72              |
|                      | 3           | 3.5 (3.0 - 4.0; 0.2)         | 100                         | 0.86              |
|                      | 4           | 4.6 (3.9 - 5.5; 0.2)         | 100                         | 0.83              |
| Neotropical          | 1           | 2.4 (1.9 - 3.0; 0.2)         | 83                          | 0.95              |
|                      | 2           | 3.5 (9.1 - 14.0; 0.2)        | 73                          | 0.95              |
|                      | 3           | 5.2 (3.9 - 6.7; 0.5)         | 77                          | 0.91              |
|                      | 4           | 8.8 (7.1 - 11.0; 0.6)        | 84                          | 0.96              |
| Afrotropical         | 1           | 1.1 (0.7 - 1.9; 0.2)         | 76                          | 0.79              |
|                      | 2           | 0.6 (0.3 - 1.1; 0.1)         | 78                          | 0.83              |
|                      | 3           | 5.8 (3.7 - 8.1; 0.9)         | 84                          | 0.93              |
|                      | 4           | 6.4 (4.3 - 9.2; 0.9)         | 87                          | 0.93              |
| Australasian         | 1           | 1.8 (1.4 - 2.2; 0.1)         | 88                          | -0.14             |
|                      | 2           | 1.7 (0.9 - 2.5; 0.3)         | 100                         | 0.73              |
|                      | 3           | 9.2 (7.2 - 11.2; 0.6)        | 96                          | 0.19              |
|                      | 4           | 11.0 (8.3 - 13.5; 0.8)       | 99                          | 0.50              |

591  
592  
593  
594  
595  
596  
597  
598  
599  
600  
601  
602

603

604

605 **Figure legends**

606

607 **Figure 1. Global map of the relative richness of tree cavity excavators versus secondary**  
608 **cavity-nesting birds (expressed as the ratio excavator / secondary cavity-nester) in 10x10**  
609 **km grid cells.** Low values (light colors) indicate relatively low numbers of excavators as  
610 compared to secondary cavity-nesters while high values (dark colors) indicate a relatively higher  
611 proportion of excavators to secondary cavity-nesters.

612

613 **Figure 2. Scatter plots of the correlations between the richness (number of species) of**  
614 **excavators and secondary cavity-nesters all forest birds (upper row), all forest specialists**  
615 **(second row), forest generalists (third row) and all non-cavity-nesting forest birds**  
616 **(specialists and generalists; bottom row) in six zoogeographic regions.** Points represent  
617 species richness values in 10×10 km grid cells, and the solid line represents the fit of a linear  
618 regression model, created using all grid cell values. Note that nearly all secondary cavity-nesters  
619 are also forest-associated species, but were not included as forest specialists or generalists.

620

621

622

623

624

625

626

627

628

629

630

631

632

633

634

635

636



**Figure 1.**

637  
638  
639  
640  
641  
642  
643  
644  
645  
646  
647  
648  
649  
650  
651  
652  
653  
654  
655  
656  
657  
658

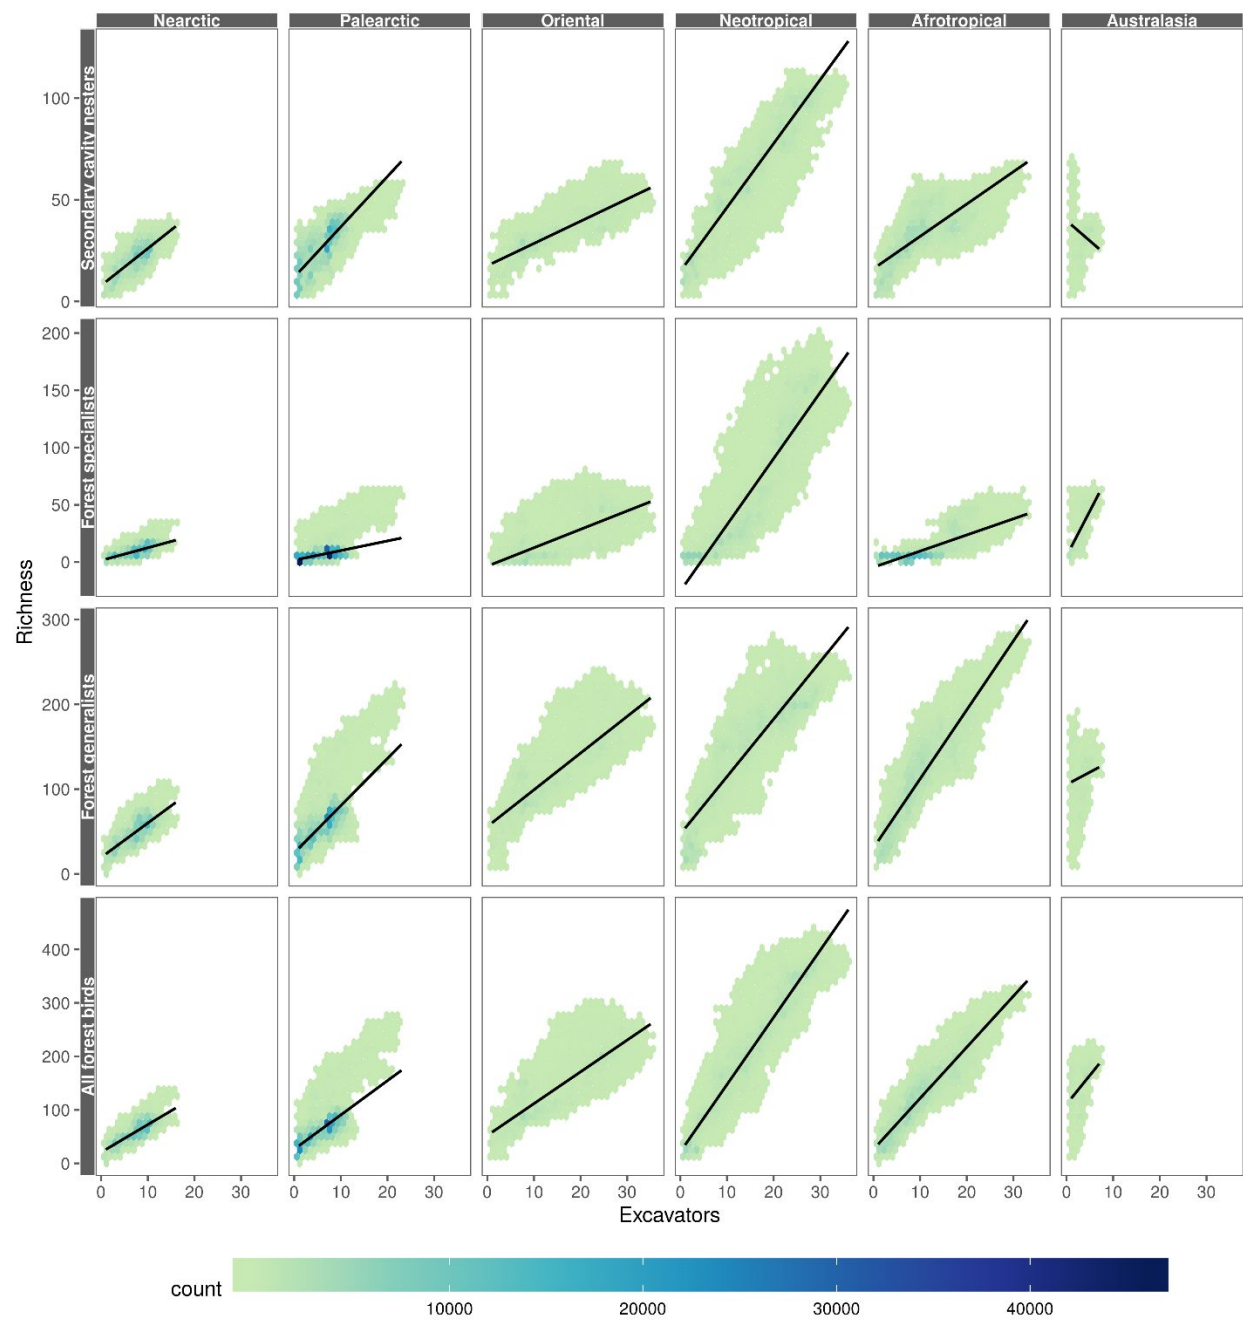

Figure 2.

659  
660  
661  
662  
663  
664  
665  
666  
667  
668  
669

670

1  
2  
3  
4  
5  
6  
7  
8  
9  
10  
11  
12  
13  
14  
15  
16  
17  
18  
19  
20  
21  
22  
23  
24  
25  
26  
27  
28  
29  
30  
31  
32  
33  
34  
35  
36  
37  
38  
39  
40  
41  
42  
43  
44  
45  
46  
47  
48  
49  
50  
51  
52  
53  
54  
55  
56  
57  
58  
59  
60



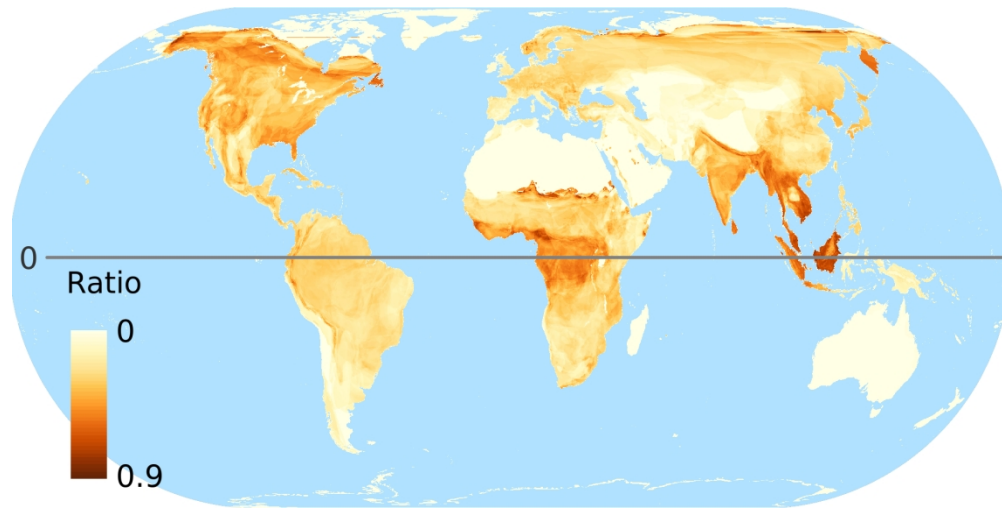

Figure 1. Global map of the relative richness of tree cavity excavators versus secondary cavity-nesting birds (expressed as the ratio excavator / secondary cavity-nester) in 10x10 km grid cells. Low values (light colors) indicate relatively low numbers of excavators as compared to secondary cavity-nesters while high values (dark colors) indicate a relatively higher proportion of excavators to secondary cavity-nesters.

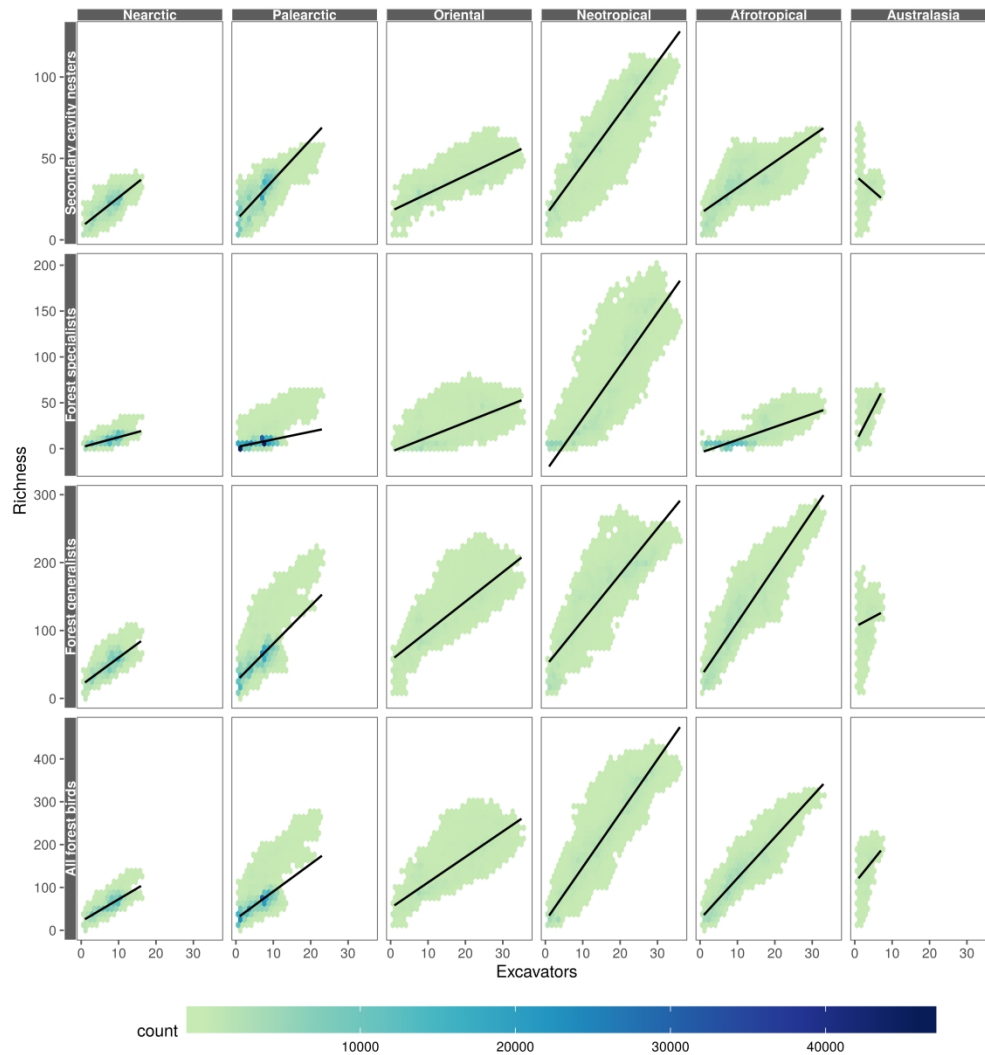

Figure 2. Scatter plots of the correlations between the richness (number of species) of excavators and secondary cavity-nesters all forest birds (upper row), all forest specialists (second row), forest generalists (third row) and all non-cavity-nesting forest birds (specialists and generalists; bottom row) in six zoogeographic regions. Points represent species richness values in 10x10 km grid cells, and the solid line represents the fit of a linear regression model, created using all grid cell values. Note that nearly all secondary cavity-nesters are also forest-associated species, but were not included as forest specialists or generalists.

## Appendix F

We thank both Editor and Reviewers for their suggestions and for giving us the chance to submit another version. We would like to point out that unfortunately the previous 'track-changed version' had some editing issues. The 'clean copy' (i.e. without track changes) was much clearer (some small writing issues only appeared after we had removed the track changes, which made it difficult to keep overview). In the clean copy version, which was, unfortunately, not used as a base for the new reviews, there were also some changes on the references (numbering) and a few different sentences.

We apologize to the Reviewers for not having submitted that comprehensive track-changed document. That said, we see that this time around we could still make some valuable improvements. For that, we thank the reviewers for their comprehensive and insightful comments.

You will find a new version with edits attached. A few larger changes are discussed below.

We identify our responses to reviewer comments with an \* preceding our response.

Reviewer 1:

Lines 185-190: poor English – check and re-write

\*We made changes to this part of the text that will hopefully improve the clarity of our message.

Lines 219-220: provide names of the authors in the text

\*We added these references in parentheses rather: “We selected and classified focal bird species (following [11, 42]) as...”

Line 295: was rho really 0.88 in both cases?

\*This was a mistake, we only wanted to highlight one relationship (between excavators and secondary cavity-nesters,  $\rho=0.88$ ). We have removed the mention of the other relationship.

Line 367: provide valid reference for this claim i.e. on high logging rates in Oriental Region

\*We received the same comment from the other reviewer. We have altered this a bit to focus on the availability of mature forests instead, and have added a reference for that.

Line 373-377: it seems to be against your prediction. Whole sentence is a bit confusing.

\*We have rephrased this, and reordered the paragraphs. We hope that this new version provides more clarity.

Line 386: what dynamics do you mean? Fire dynamics?

\*We understand that this wording is a bit confusing. Rather, we are interested in discussing the 'processes' of cavity formation, tree decay and persistence, etc., for which reason we highlight the example of the 'process' of decay-formation of tree cavities.

Line 514-516: I would explicitly mention high detectability here

\*We have added the words high detectability to this phrase.

Reviewer 2:

-38 and 39?? Please check again cite numbers throughout the manuscript

\*These citations were not updated in the track-change version of the manuscript as Endnote did not update numbering until track-changes were accepted. The citations were correctly numbered in the actual, clean, version that was also submitted and that could be found later on in the PDF. In this new submission, both the track-change and clean versions of the manuscript are updated.

I'd suggest to change the name, because secondary-cavity nesters are also 'forest birds', and are not included in this group... can be confusing

\*We have retained the name secondary-cavity nesters, but now explain in the methods that forest generalists are 'habitat generalist birds that use forest habitat but also at least one other type of habitat, but that this group in our study excludes all tree cavity-nesters.', following the reviewer's suggestion.

-incorrect. In Australasia, excavators and secondary cavity-nesters had a negative relationship (Fig. 2)

\*We understand that this part was confusing. The gls slopes were positive for this relationship, but Spearman rho is negative. However, in general Spearman rho was so low for the relationships between excavators vs. secondary-cavity nesters and excavators vs. forest generalists ( $\leq |0.19|$  for both) that we may question whether there are any relationships at all. We added a statement to explain this in the text. Finally, we also point out that due to computational constraints, the figure depicting the relationships (Figure 2) shows lines representing linear regressions rather than gls models, and that these models might have slightly different outcomes. That said, to avoid further confusion, we removed the regression lines for the two relationships in Australasia that had the negligible relationships.

-Again, the use of 'all forest' is confusing. Besides, apparently you have made a correlation between excavators and specialists + generalists. In the responses to comments on the previous version, you have answered "We therefore opted to re-run all the analyzes for groups that do not have any overlaps", which somewhat contradicts this. In any case, although you in the introduction you mention that this relationship will be assessed, it is not explained in methods, and honestly I don't see the sense of evaluating these two groups together, at least with the information provided in the introduction.

\*We thank the reviewer for his/her patience in pointing out these inconsistencies. We have altered the text to make clear that we have used non-overlapping groups for three of the relationships (and explained in the methods what these groups are, e.g., "forest generalist birds: habitat generalist birds that use forest habitat but also at least one other habitat type for nesting of habitat, again excluding cavity-nesters."). But we have also explained in more detail why we added tests of a fourth relationship, that between excavators and forest specialists + generalists (grouped). We opted to include this because it strengthens the notion that excavators may be effective indicators of not just the narrow group of specialist species, but of the larger forest bird community in general.

-well... you're saying that .96 is stronger than .95. I'd say that is a minimal difference in which the focus of a discussion doesn't have to be focused.

\*In this version we have completely reworked this part of the Discussion, and we no longer make this point. We have followed the reviewer's advice elsewhere, and focus on other discussion points.

-I'd like to see more explanations/discussions on other patterns:

-why relationships between excavators and SCN are mostly weaker than the others relationships across regions? This was one of the relationship more strong that one expect by cavity facilitation

\*We explain this is in more detail now. For example, a part of the new text includes:

“This indicates that the influence of direct facilitation of nest-cavities is potentially less important than the indirect associations with forest elements and shared habitat preferences in shaping these relationships, but that the relative importance of both depends on the region under consideration.” We add to that in other paragraphs, explanations such as “we found weaker relationships between excavators and secondary cavity-nesters than between excavators and forest specialists in both the Neotropical and Afrotropical regions, possibly because at least some secondary-cavity nesters do not share a preference for habitats and forest elements with excavators in this region and because a high reliance on decay-formed cavities releases secondary-cavity nesters from dependency on excavators to provide their cavities [34]. “

2) given the known pattern of the greater dependence of SCN in woodpecker-excavated cavities in Nearctic and Palearctic than in tropical regions, why these relationships showed the opposite pattern? (greater rho in tropics than in north temperate and boreal regions)

\*We address these patterns in more detail now. For example, a part of the new text includes:

“Thus, the fact that the relationships between excavators and secondary-cavity nesters are stronger in all three largely tropical regions (Oriental, Neotropical, and Afrotropical) as compared to the predominantly temperate/boreal Nearctic and Palearctic may not reflect a larger dependency of secondary cavity-nesters on excavators for cavities in the tropics, but is more likely to stem from overall high species richness as well as from strong indirect associations that both groups of birds have with forest elements and shared habitat preferences.”

-Logging is a highly heterogeneous activity in intensity and extension throughout the world, and of relatively recent impact. Therefore, resorting to this explanation to explain a biogeographic scale pattern, where evolutionary time scales and speciation rates are involved, seems inappropriate. Moreover, it is not clear to me how the changes produced by logging could be influencing the data set used in the analyzes. For example, do the maps you used include information on local extinctions across all world’s forests due exclusively to logging?

\*We understand that this might have come across a bit speculative. As we do think that historical deforestation patterns are very different in the Oriental than the Neotropical and Afrotropical regions, due to higher human densities etc., and that this could shape richness patterns, even at larger spatial scales. Therefore, we have altered our discussion to state that there is less mature forest left in this region, a more general statement that, we think, could have influenced the observed patterns.

## Appendix G

\*We thank the Editor(s) and reviewers for their time and intellectual investment, this has surely led to a much-improved manuscript. We understood the need for further editing of the language, and both the first author as well one of the co-authors (a native English speaker with a long and substantial publication record) have made edits that ensure the manuscript is easier to read and avoid of grammatical or other language mistakes.

We do not have a point-by-point rebuttal at this point, but hope that the text is overall improved, and that there are no more errors such as those previously highlighted by the reviewer in lines 312-319 and 363-368.

\*In addition, to the best of our knowledge, we have included all required statements (e.g., on funding etc.). Of course, should we have missed anything, we would be happy to provide further details.

On behalf of the Editors, I am pleased to inform you that your Manuscript RSOS-192177.R2 entitled "Global relationships between tree-cavity excavators and forest bird richness" has been accepted for publication in Royal Society Open Science subject to minor revision in accordance with the referee suggestions. Please find the referees' comments at the end of this email.

The reviewers and Subject Editor have recommended publication, but also suggest some minor revisions to your manuscript. Therefore, I invite you to respond to the comments and revise your manuscript.

- Ethics statement

If your study uses humans or animals please include details of the ethical approval received, including the name of the committee that granted approval. For human studies please also detail whether informed consent was obtained. For field studies on animals please include details of all permissions, licences and/or approvals granted to carry out the fieldwork.

- Data accessibility

It is a condition of publication that all supporting data are made available either as supplementary information or preferably in a suitable permanent repository. The data accessibility section should state where the article's supporting data can be accessed. This section should also include details, where possible of where to access other relevant research materials such as statistical tools, protocols, software etc can be accessed. If the data has been deposited in an external repository this section should list the database, accession number and link to the DOI for all data from the article that has been made publicly available. Data sets that have been deposited in an external repository and have a DOI should also be appropriately cited in the manuscript and included in the reference list.

If you wish to submit your supporting data or code to Dryad (<http://datadryad.org/>), or modify your current submission to dryad, please use the following link:

<http://datadryad.org/submit?journalID=RSOS&manu=RSOS-192177.R2>

- Competing interests

Please declare any financial or non-financial competing interests, or state that you have no competing interests.

- Authors' contributions

All submissions, other than those with a single author, must include an Authors' Contributions section which individually lists the specific contribution of each author. The list of Authors should

meet all of the following criteria; 1) substantial contributions to conception and design, or acquisition of data, or analysis and interpretation of data; 2) drafting the article or revising it critically for important intellectual content; and 3) final approval of the version to be published.

All contributors who do not meet all of these criteria should be included in the acknowledgements.

We suggest the following format:

AB carried out the molecular lab work, participated in data analysis, carried out sequence alignments, participated in the design of the study and drafted the manuscript; CD carried out the statistical analyses; EF collected field data; GH conceived of the study, designed the study, coordinated the study and helped draft the manuscript. All authors gave final approval for publication.

- Acknowledgements

Please acknowledge anyone who contributed to the study but did not meet the authorship criteria.

- Funding statement

Please list the source of funding for each author.

Please note that we cannot publish your manuscript without these end statements included. We have included a screenshot example of the end statements for reference. If you feel that a given heading is not relevant to your paper, please nevertheless include the heading and explicitly state that it is not relevant to your work.

Because the schedule for publication is very tight, it is a condition of publication that you submit the revised version of your manuscript before 19-Jun-2020. Please note that the revision deadline will expire at 00.00am on this date. If you do not think you will be able to meet this date please let me know immediately.

To revise your manuscript, log into <https://mc.manuscriptcentral.com/rsos> and enter your Author Centre, where you will find your manuscript title listed under "Manuscripts with Decisions". Under "Actions," click on "Create a Revision." You will be unable to make your revisions on the originally submitted version of the manuscript. Instead, revise your manuscript and upload a new version through your Author Centre.

When submitting your revised manuscript, you will be able to respond to the comments made by the referees and upload a file "Response to Referees" in "Section 6 - File Upload". You can use this to document any changes you make to the original manuscript. In order to expedite the processing of the revised manuscript, please be as specific as possible in your response to the referees.

When uploading your revised files please make sure that you have:

- 1) A text file of the manuscript (tex, txt, rtf, docx or doc), references, tables (including captions) and figure captions. Do not upload a PDF as your "Main Document".
- 2) A separate electronic file of each figure (EPS or print-quality PDF preferred (either format should be produced directly from original creation package), or original software format)
- 3) Included a 100 word media summary of your paper when requested at submission. Please ensure you have entered correct contact details (email, institution and telephone) in your user account

4) Included the raw data to support the claims made in your paper. You can either include your data as electronic supplementary material or upload to a repository and include the relevant doi within your manuscript

5) All supplementary materials accompanying an accepted article will be treated as in their final form. Note that the Royal Society will neither edit nor typeset supplementary material and it will be hosted as provided. Please ensure that the supplementary material includes the paper details where possible (authors, article title, journal name).

Supplementary files will be published alongside the paper on the journal website and posted on the online figshare repository (<https://figshare.com>). The heading and legend provided for each supplementary file during the submission process will be used to create the figshare page, so please ensure these are accurate and informative so that your files can be found in searches. Files on figshare will be made available approximately one week before the accompanying article so that the supplementary material can be attributed a unique DOI.

Once again, thank you for submitting your manuscript to Royal Society Open Science and I look forward to receiving your revision. If you have any questions at all, please do not hesitate to get in touch.

Kind regards,  
Andrew Dunn  
Royal Society Open Science Editorial Office  
Royal Society Open Science  
[openscience@royalsociety.org](mailto:openscience@royalsociety.org)

on behalf of Prof Kevin Padian (Subject Editor)  
[openscience@royalsociety.org](mailto:openscience@royalsociety.org)

Associate Editor Comments to Author :

The reviewer is broadly satisfied with the scientific content of the paper, though they would prefer that you seek further English language support. Examples of professional services providing such advice may be found at <https://royalsociety.org/journals/authors/benefits/language-editing/>.

Reviewer comments to Author:

Reviewer: 1

Comments to the Author(s)

I am generally pleased with changes included in this version of the manuscript. However, it would be great to carefully read some of the new sentences and improve them linguistically. For example check lines 312-319 and 363-368 (clean version) for missing words.

\*\*\*\*\*

Journal Name: Royal Society Open Science  
Journal Code: RSOS



Online ISSN: 2054-5703

Journal Admin Email: [openscience@royalsociety.org](mailto:openscience@royalsociety.org)

Journal Editor: Andrew Dunn

Journal Editor Email: [openscience@royalsociety.org](mailto:openscience@royalsociety.org)

MS Reference Number: RSOS-192177.R2

Article Status: SUBMITTED

MS Dryad ID: RSOS-192177.R2

MS Title: Global relationships between tree-cavity excavators and forest bird richness

MS Authors: van der Hoek, Yntze; Gaona, Gabriel; Ciach, Michal; Martin, Kathy

Contact Author: Yntze van der Hoek

Contact Author Email: [yntzevanderhoek@gmail.com](mailto:yntzevanderhoek@gmail.com)

Contact Author Address 1: NA

Contact Author Address 2: NA

Contact Author Address 3:

Contact Author City: Musanze

Contact Author State: NA

Contact Author Country: Rwanda

Contact Author ZIP/Postal Code: NA

Keywords: Facilitator species, Indicator species, Species interactions, Picidae, Management surrogates, Secondary cavity-nesting birds

Abstract: Global monitoring of biodiversity and ecosystem change can be aided by the effective use of indicators. Tree-cavity excavators, the majority of which are woodpeckers (Picidae), are known to be useful indicators of the health or naturalness of forest ecosystems and the diversity of forest birds. They are indicators of the latter due to their associations with particular forest elements and because of their role in facilitating the occurrence of other species through the provision of nest cavities. Here, we investigated whether these positive correlations between excavators and other forest birds are also found at broad geographical scales. We used global distribution maps to extract richness estimates of tree-cavity nesting and forest-associated birds, which we grouped by zoogeographic regions. We then created generalized least squares models to assess the relationships between these groups of birds. We show that richness of tree-cavity excavating birds correlates positively with that of secondary cavity nesters, and with other forest birds (generalists and specialists), at global scales, but with variation across zoogeographic regions. As many excavators are relatively easy to detect, play keystone roles at local scales, and are effective management targets, we propose that excavators are useful for biodiversity monitoring across multiple spatial scales and geographic regions, especially in the tropics.

EndDryadContent
